# Supplementary material for: Divergent host genetic architectures drive breed-specific modulation of the caecal microbiome in chickens
Source: Research Square preprint supplement (doi:10.21203/rs.3.rs-5953792/v1), 2025-02-06
Supplement: Supplementary file 1 [file baff3fd412f0ac8b34ef53f3.xlsx]

## Sheet: meta
Sample ID	Ped_ID	Farm_ID	Farm_uni_ID.x	Farm	Breed	w_des	Household_waste	Antibiotic_admin	Supplement	workers_exp_oa	visitors_inside	other_pa	Type_farm	Unit_traffic	ventilation	water_supply	feed_stored	dogs	Breed_strain	OtherBirds
AEC01CM1	Titan_EG0099_10793HD_Plate4_H01.CEL	AEC-01	Farm_AEC-01	1	Cobb400	yes	no	yes	no	no	no	yes	open	no	Natural	Automatic	Within premises	yes	Commercial broiler	no
AEC01CM10	Titan_EG0099_10793HD_Plate4_A03.CEL	AEC-01	Farm_AEC-01	1	Cobb400	yes	no	yes	no	no	no	yes	open	no	Natural	Automatic	Within premises	yes	Commercial broiler	no
AEC01CM2	Titan_EG0099_10793HD_Plate4_A02.CEL	AEC-01	Farm_AEC-01	1	Cobb400	yes	no	yes	no	no	no	yes	open	no	Natural	Automatic	Within premises	yes	Commercial broiler	no
AEC01CM3	Titan_EG0099_10793HD_Plate4_B02.CEL	AEC-01	Farm_AEC-01	1	Cobb400	yes	no	yes	no	no	no	yes	open	no	Natural	Automatic	Within premises	yes	Commercial broiler	no
AEC01CM4	Titan_EG0099_10793HD_Plate4_C02.CEL	AEC-01	Farm_AEC-01	1	Cobb400	yes	no	yes	no	no	no	yes	open	no	Natural	Automatic	Within premises	yes	Commercial broiler	no
AEC01CM5	Titan_EG0099_10793HD_Plate4_D02.CEL	AEC-01	Farm_AEC-01	1	Cobb400	yes	no	yes	no	no	no	yes	open	no	Natural	Automatic	Within premises	yes	Commercial broiler	no
AEC01CM6	Titan_EG0099_10793HD_Plate4_E02.CEL	AEC-01	Farm_AEC-01	1	Cobb400	yes	no	yes	no	no	no	yes	open	no	Natural	Automatic	Within premises	yes	Commercial broiler	no
AEC01CM7	Titan_EG0099_10793HD_Plate4_F02.CEL	AEC-01	Farm_AEC-01	1	Cobb400	yes	no	yes	no	no	no	yes	open	no	Natural	Automatic	Within premises	yes	Commercial broiler	no
AEC01CM8	Titan_EG0099_10793HD_Plate4_G02.CEL	AEC-01	Farm_AEC-01	1	Cobb400	yes	no	yes	no	no	no	yes	open	no	Natural	Automatic	Within premises	yes	Commercial broiler	no
AEC01CM9	Titan_EG0099_10793HD_Plate4_H02.CEL	AEC-01	Farm_AEC-01	1	Cobb400	yes	no	yes	no	no	no	yes	open	no	Natural	Automatic	Within premises	yes	Commercial broiler	no
AEC02CM1	Titan_EG0099_10793HD_Plate4_D09.CEL	AEC-02	Farm_AEC-02	2	Cobb400	yes	no	yes	yes	no	no	no	open	no	Natural	Automatic	Within premises	yes	Commercial broiler	no
AEC02CM10	Titan_EG0099_10793HD_Plate4_E10.CEL	AEC-02	Farm_AEC-02	2	Cobb400	yes	no	yes	yes	no	no	no	open	no	Natural	Automatic	Within premises	yes	Commercial broiler	no
AEC02CM2	Titan_EG0099_10793HD_Plate4_E09.CEL	AEC-02	Farm_AEC-02	2	Cobb400	yes	no	yes	yes	no	no	no	open	no	Natural	Automatic	Within premises	yes	Commercial broiler	no
AEC02CM3	Titan_EG0099_10793HD_Plate4_F09.CEL	AEC-02	Farm_AEC-02	2	Cobb400	yes	no	yes	yes	no	no	no	open	no	Natural	Automatic	Within premises	yes	Commercial broiler	no
AEC02CM4	Titan_EG0099_10793HD_Plate4_G09.CEL	AEC-02	Farm_AEC-02	2	Cobb400	yes	no	yes	yes	no	no	no	open	no	Natural	Automatic	Within premises	yes	Commercial broiler	no
AEC02CM5	Titan_EG0099_10793HD_Plate4_H09.CEL	AEC-02	Farm_AEC-02	2	Cobb400	yes	no	yes	yes	no	no	no	open	no	Natural	Automatic	Within premises	yes	Commercial broiler	no
AEC02CM6	Titan_EG0099_10793HD_Plate4_A10.CEL	AEC-02	Farm_AEC-02	2	Cobb400	yes	no	yes	yes	no	no	no	open	no	Natural	Automatic	Within premises	yes	Commercial broiler	no
AEC02CM7	Titan_EG0099_10793HD_Plate4_B10.CEL	AEC-02	Farm_AEC-02	2	Cobb400	yes	no	yes	yes	no	no	no	open	no	Natural	Automatic	Within premises	yes	Commercial broiler	no
AEC02CM8	Titan_EG0099_10793HD_Plate4_C10.CEL	AEC-02	Farm_AEC-02	2	Cobb400	yes	no	yes	yes	no	no	no	open	no	Natural	Automatic	Within premises	yes	Commercial broiler	no
AEC02CM9	Titan_EG0099_10793HD_Plate4_D10.CEL	AEC-02	Farm_AEC-02	2	Cobb400	yes	no	yes	yes	no	no	no	open	no	Natural	Automatic	Within premises	yes	Commercial broiler	no
AEC03CM1	Titan_EG0100_10793HD_Plate5_D02.CEL	AEC-03	Farm_AEC-03	3	Cobb400	yes	no	yes	yes	yes	no	yes	open	no	Natural	Automatic	Within premises	yes	Commercial broiler	no
AEC03CM10	Titan_EG0100_10793HD_Plate5_E03.CEL	AEC-03	Farm_AEC-03	3	Cobb400	yes	no	yes	yes	yes	no	yes	open	no	Natural	Automatic	Within premises	yes	Commercial broiler	no
AEC03CM2	Titan_EG0100_10793HD_Plate5_E02.CEL	AEC-03	Farm_AEC-03	3	Cobb400	yes	no	yes	yes	yes	no	yes	open	no	Natural	Automatic	Within premises	yes	Commercial broiler	no
AEC03CM3	Titan_EG0100_10793HD_Plate5_F02.CEL	AEC-03	Farm_AEC-03	3	Cobb400	yes	no	yes	yes	yes	no	yes	open	no	Natural	Automatic	Within premises	yes	Commercial broiler	no
AEC03CM4	Titan_EG0100_10793HD_Plate5_G02.CEL	AEC-03	Farm_AEC-03	3	Cobb400	yes	no	yes	yes	yes	no	yes	open	no	Natural	Automatic	Within premises	yes	Commercial broiler	no
AEC03CM5	Titan_EG0100_10793HD_Plate5_H02.CEL	AEC-03	Farm_AEC-03	3	Cobb400	yes	no	yes	yes	yes	no	yes	open	no	Natural	Automatic	Within premises	yes	Commercial broiler	no
AEC03CM6	Titan_EG0100_10793HD_Plate5_A03.CEL	AEC-03	Farm_AEC-03	3	Cobb400	yes	no	yes	yes	yes	no	yes	open	no	Natural	Automatic	Within premises	yes	Commercial broiler	no
AEC03CM7	Titan_EG0100_10793HD_Plate5_B03.CEL	AEC-03	Farm_AEC-03	3	Cobb400	yes	no	yes	yes	yes	no	yes	open	no	Natural	Automatic	Within premises	yes	Commercial broiler	no
AEC03CM8	Titan_EG0100_10793HD_Plate5_C03.CEL	AEC-03	Farm_AEC-03	3	Cobb400	yes	no	yes	yes	yes	no	yes	open	no	Natural	Automatic	Within premises	yes	Commercial broiler	no
AEC03CM9	Titan_EG0100_10793HD_Plate5_D03.CEL	AEC-03	Farm_AEC-03	3	Cobb400	yes	no	yes	yes	yes	no	yes	open	no	Natural	Automatic	Within premises	yes	Commercial broiler	no
AEC04CM1	Titan_EG0103_10793HD_Plate8_B10.CEL	AEC-04	Farm_AEC-04	4	Cobb400	yes	no	yes	no	yes	no	yes	open	no	Artificial	Automatic	Outside premises	yes	Commercial broiler	no
AEC04CM10	Titan_EG0100_10793HD_Plate5_E11.CEL	AEC-04	Farm_AEC-04	4	Cobb400	yes	no	yes	no	yes	no	yes	open	no	Artificial	Automatic	Outside premises	yes	Commercial broiler	no
AEC04CM2	Titan_EG0103_10793HD_Plate8_C10.CEL	AEC-04	Farm_AEC-04	4	Cobb400	yes	no	yes	no	yes	no	yes	open	no	Artificial	Automatic	Outside premises	yes	Commercial broiler	no
AEC04CM3	Titan_EG0100_10793HD_Plate5_H04.CEL	AEC-04	Farm_AEC-04	4	Cobb400	yes	no	yes	no	yes	no	yes	open	no	Artificial	Automatic	Outside premises	yes	Commercial broiler	no
AEC04CM5	Titan_EG0100_10793HD_Plate5_B05.CEL	AEC-04	Farm_AEC-04	4	Cobb400	yes	no	yes	no	yes	no	yes	open	no	Artificial	Automatic	Outside premises	yes	Commercial broiler	no
AEC04CM6	Titan_EG0100_10793HD_Plate5_C05.CEL	AEC-04	Farm_AEC-04	4	Cobb400	yes	no	yes	no	yes	no	yes	open	no	Artificial	Automatic	Outside premises	yes	Commercial broiler	no
AEC04CM7	Titan_EG0100_10793HD_Plate5_D05.CEL	AEC-04	Farm_AEC-04	4	Cobb400	yes	no	yes	no	yes	no	yes	open	no	Artificial	Automatic	Outside premises	yes	Commercial broiler	no
AEC04CM8	Titan_EG0100_10793HD_Plate5_E05.CEL	AEC-04	Farm_AEC-04	4	Cobb400	yes	no	yes	no	yes	no	yes	open	no	Artificial	Automatic	Outside premises	yes	Commercial broiler	no
AEC04CM9	Titan_EG0100_10793HD_Plate5_F05.CEL	AEC-04	Farm_AEC-04	4	Cobb400	yes	no	yes	no	yes	no	yes	open	no	Artificial	Automatic	Outside premises	yes	Commercial broiler	no
AEC05CM1	Titan_EG0099_10793HD_Plate4_H11.CEL	AEC-05	Farm_AEC-05	5	Cobb400	yes	no	yes	no	yes	no	yes	open	no	Natural	Automatic	Within premises	no	Commercial broiler	no
AEC05CM10	Titan_EG0100_10793HD_Plate5_A01.CEL	AEC-05	Farm_AEC-05	5	Cobb400	yes	no	yes	no	yes	no	yes	open	no	Natural	Automatic	Within premises	no	Commercial broiler	no
AEC05CM2	Titan_EG0099_10793HD_Plate4_A12.CEL	AEC-05	Farm_AEC-05	5	Cobb400	yes	no	yes	no	yes	no	yes	open	no	Natural	Automatic	Within premises	no	Commercial broiler	no
AEC05CM3	Titan_EG0099_10793HD_Plate4_B12.CEL	AEC-05	Farm_AEC-05	5	Cobb400	yes	no	yes	no	yes	no	yes	open	no	Natural	Automatic	Within premises	no	Commercial broiler	no
AEC05CM4	Titan_EG0099_10793HD_Plate4_C12.CEL	AEC-05	Farm_AEC-05	5	Cobb400	yes	no	yes	no	yes	no	yes	open	no	Natural	Automatic	Within premises	no	Commercial broiler	no
AEC05CM5	Titan_EG0099_10793HD_Plate4_D12.CEL	AEC-05	Farm_AEC-05	5	Cobb400	yes	no	yes	no	yes	no	yes	open	no	Natural	Automatic	Within premises	no	Commercial broiler	no
AEC05CM6	Titan_EG0099_10793HD_Plate4_E12.CEL	AEC-05	Farm_AEC-05	5	Cobb400	yes	no	yes	no	yes	no	yes	open	no	Natural	Automatic	Within premises	no	Commercial broiler	no
AEC05CM7	Titan_EG0099_10793HD_Plate4_F12.CEL	AEC-05	Farm_AEC-05	5	Cobb400	yes	no	yes	no	yes	no	yes	open	no	Natural	Automatic	Within premises	no	Commercial broiler	no
AEC05CM8	Titan_EG0099_10793HD_Plate4_G12.CEL	AEC-05	Farm_AEC-05	5	Cobb400	yes	no	yes	no	yes	no	yes	open	no	Natural	Automatic	Within premises	no	Commercial broiler	no
AEC05CM9	Titan_EG0100_10793HD_Plate5_E12.CEL	AEC-05	Farm_AEC-05	5	Cobb400	yes	no	yes	no	yes	no	yes	open	no	Natural	Automatic	Within premises	no	Commercial broiler	no
AEC06CM1	Titan_EG0098_10793HD_Plate3_F12.CEL	AEC-06	Farm_AEC-06	6	Cobb400	yes	no	yes	yes	no	no	no	open	no	Natural	Automatic	Within premises	yes	Commercial broiler	no
AEC06CM10	Titan_EG0099_10793HD_Plate4_G01.CEL	AEC-06	Farm_AEC-06	6	Cobb400	yes	no	yes	yes	no	no	no	open	no	Natural	Automatic	Within premises	yes	Commercial broiler	no
AEC06CM2	Titan_EG0098_10793HD_Plate3_G12.CEL	AEC-06	Farm_AEC-06	6	Cobb400	yes	no	yes	yes	no	no	no	open	no	Natural	Automatic	Within premises	yes	Commercial broiler	no
AEC06CM3	Titan_EG0100_10793HD_Plate5_D12.CEL	AEC-06	Farm_AEC-06	6	Cobb400	yes	no	yes	yes	no	no	no	open	no	Natural	Automatic	Within premises	yes	Commercial broiler	no
AEC06CM4	Titan_EG0099_10793HD_Plate4_A01.CEL	AEC-06	Farm_AEC-06	6	Cobb400	yes	no	yes	yes	no	no	no	open	no	Natural	Automatic	Within premises	yes	Commercial broiler	no
AEC06CM6	Titan_EG0099_10793HD_Plate4_C01.CEL	AEC-06	Farm_AEC-06	6	Cobb400	yes	no	yes	yes	no	no	no	open	no	Natural	Automatic	Within premises	yes	Commercial broiler	no
AEC06CM7	Titan_EG0099_10793HD_Plate4_D01.CEL	AEC-06	Farm_AEC-06	6	Cobb400	yes	no	yes	yes	no	no	no	open	no	Natural	Automatic	Within premises	yes	Commercial broiler	no
AEC06CM9	Titan_EG0099_10793HD_Plate4_F01.CEL	AEC-06	Farm_AEC-06	6	Cobb400	yes	no	yes	yes	no	no	no	open	no	Natural	Automatic	Within premises	yes	Commercial broiler	no
AEC07CM1	Titan_EG0099_10793HD_Plate4_B03.CEL	AEC-07	Farm_AEC-07	7	Cobb400	yes	no	yes	no	yes	no	yes	open	no	Natural	Automatic	Within premises	yes	Commercial broiler	yes
AEC07CM10	Titan_EG0099_10793HD_Plate4_C04.CEL	AEC-07	Farm_AEC-07	7	Cobb400	yes	no	yes	no	yes	no	yes	open	no	Natural	Automatic	Within premises	yes	Commercial broiler	yes
AEC07CM2	Titan_EG0099_10793HD_Plate4_C03.CEL	AEC-07	Farm_AEC-07	7	Cobb400	yes	no	yes	no	yes	no	yes	open	no	Natural	Automatic	Within premises	yes	Commercial broiler	yes
AEC07CM3	Titan_EG0099_10793HD_Plate4_D03.CEL	AEC-07	Farm_AEC-07	7	Cobb400	yes	no	yes	no	yes	no	yes	open	no	Natural	Automatic	Within premises	yes	Commercial broiler	yes
AEC07CM4	Titan_EG0099_10793HD_Plate4_E03.CEL	AEC-07	Farm_AEC-07	7	Cobb400	yes	no	yes	no	yes	no	yes	open	no	Natural	Automatic	Within premises	yes	Commercial broiler	yes
AEC07CM5	Titan_EG0099_10793HD_Plate4_F03.CEL	AEC-07	Farm_AEC-07	7	Cobb400	yes	no	yes	no	yes	no	yes	open	no	Natural	Automatic	Within premises	yes	Commercial broiler	yes
AEC07CM6	Titan_EG0099_10793HD_Plate4_G03.CEL	AEC-07	Farm_AEC-07	7	Cobb400	yes	no	yes	no	yes	no	yes	open	no	Natural	Automatic	Within premises	yes	Commercial broiler	yes
AEC07CM7	Titan_EG0099_10793HD_Plate4_H03.CEL	AEC-07	Farm_AEC-07	7	Cobb400	yes	no	yes	no	yes	no	yes	open	no	Natural	Automatic	Within premises	yes	Commercial broiler	yes
AEC07CM8	Titan_EG0099_10793HD_Plate4_A04.CEL	AEC-07	Farm_AEC-07	7	Cobb400	yes	no	yes	no	yes	no	yes	open	no	Natural	Automatic	Within premises	yes	Commercial broiler	yes
AEC07CM9	Titan_EG0099_10793HD_Plate4_B04.CEL	AEC-07	Farm_AEC-07	7	Cobb400	yes	no	yes	no	yes	no	yes	open	no	Natural	Automatic	Within premises	yes	Commercial broiler	yes
AEC08CM1	Titan_EG0099_10793HD_Plate4_H06.CEL	AEC-08	Farm_AEC-08	8	Cobb400	yes	no	yes	yes	yes	no	yes	open	no	Natural	Automatic	Outside premises	yes	Commercial broiler	no
AEC08CM10	Titan_EG0099_10793HD_Plate4_A08.CEL	AEC-08	Farm_AEC-08	8	Cobb400	yes	no	yes	yes	yes	no	yes	open	no	Natural	Automatic	Outside premises	yes	Commercial broiler	no
AEC08CM2	Titan_EG0099_10793HD_Plate4_A07.CEL	AEC-08	Farm_AEC-08	8	Cobb400	yes	no	yes	yes	yes	no	yes	open	no	Natural	Automatic	Outside premises	yes	Commercial broiler	no
AEC08CM3	Titan_EG0099_10793HD_Plate4_B07.CEL	AEC-08	Farm_AEC-08	8	Cobb400	yes	no	yes	yes	yes	no	yes	open	no	Natural	Automatic	Outside premises	yes	Commercial broiler	no
AEC08CM4	Titan_EG0099_10793HD_Plate4_C07.CEL	AEC-08	Farm_AEC-08	8	Cobb400	yes	no	yes	yes	yes	no	yes	open	no	Natural	Automatic	Outside premises	yes	Commercial broiler	no
AEC08CM5	Titan_EG0099_10793HD_Plate4_D07.CEL	AEC-08	Farm_AEC-08	8	Cobb400	yes	no	yes	yes	yes	no	yes	open	no	Natural	Automatic	Outside premises	yes	Commercial broiler	no
AEC08CM6	Titan_EG0099_10793HD_Plate4_E07.CEL	AEC-08	Farm_AEC-08	8	Cobb400	yes	no	yes	yes	yes	no	yes	open	no	Natural	Automatic	Outside premises	yes	Commercial broiler	no
AEC08CM7	Titan_EG0099_10793HD_Plate4_F07.CEL	AEC-08	Farm_AEC-08	8	Cobb400	yes	no	yes	yes	yes	no	yes	open	no	Natural	Automatic	Outside premises	yes	Commercial broiler	no
AEC08CM8	Titan_EG0099_10793HD_Plate4_G07.CEL	AEC-08	Farm_AEC-08	8	Cobb400	yes	no	yes	yes	yes	no	yes	open	no	Natural	Automatic	Outside premises	yes	Commercial broiler	no
AEC08CM9	Titan_EG0099_10793HD_Plate4_H07.CEL	AEC-08	Farm_AEC-08	8	Cobb400	yes	no	yes	yes	yes	no	yes	open	no	Natural	Automatic	Outside premises	yes	Commercial broiler	no
AEC09CM1	Titan_EG0100_10793HD_Plate5_F03.CEL	AEC-09	Farm_AEC-09	9	Cobb400	yes	no	yes	yes	no	no	no	open	no	Natural	Automatic	Within premises	yes	Commercial broiler	no
AEC09CM10	Titan_EG0100_10793HD_Plate5_G04.CEL	AEC-09	Farm_AEC-09	9	Cobb400	yes	no	yes	yes	no	no	no	open	no	Natural	Automatic	Within premises	yes	Commercial broiler	no
AEC09CM2	Titan_EG0100_10793HD_Plate5_G03.CEL	AEC-09	Farm_AEC-09	9	Cobb400	yes	no	yes	yes	no	no	no	open	no	Natural	Automatic	Within premises	yes	Commercial broiler	no
AEC09CM3	Titan_EG0100_10793HD_Plate5_H03.CEL	AEC-09	Farm_AEC-09	9	Cobb400	yes	no	yes	yes	no	no	no	open	no	Natural	Automatic	Within premises	yes	Commercial broiler	no
AEC09CM4	Titan_EG0100_10793HD_Plate5_A04.CEL	AEC-09	Farm_AEC-09	9	Cobb400	yes	no	yes	yes	no	no	no	open	no	Natural	Automatic	Within premises	yes	Commercial broiler	no
AEC09CM5	Titan_EG0100_10793HD_Plate5_B04.CEL	AEC-09	Farm_AEC-09	9	Cobb400	yes	no	yes	yes	no	no	no	open	no	Natural	Automatic	Within premises	yes	Commercial broiler	no
AEC09CM6	Titan_EG0100_10793HD_Plate5_C04.CEL	AEC-09	Farm_AEC-09	9	Cobb400	yes	no	yes	yes	no	no	no	open	no	Natural	Automatic	Within premises	yes	Commercial broiler	no
AEC09CM7	Titan_EG0100_10793HD_Plate5_D04.CEL	AEC-09	Farm_AEC-09	9	Cobb400	yes	no	yes	yes	no	no	no	open	no	Natural	Automatic	Within premises	yes	Commercial broiler	no
AEC09CM8	Titan_EG0100_10793HD_Plate5_E04.CEL	AEC-09	Farm_AEC-09	9	Cobb400	yes	no	yes	yes	no	no	no	open	no	Natural	Automatic	Within premises	yes	Commercial broiler	no
AEC10CM1	Titan_EG0099_10793HD_Plate4_D04.CEL	AEC-10	Farm_AEC-10	10	Cobb400	yes	no	yes	yes	no	no	no	open	no	Natural	Automatic	Within premises	yes	Commercial broiler	no
AEC10CM2	Titan_EG0099_10793HD_Plate4_E04.CEL	AEC-10	Farm_AEC-10	10	Cobb400	yes	no	yes	yes	no	no	no	open	no	Natural	Automatic	Within premises	yes	Commercial broiler	no
AEC10CM3	Titan_EG0099_10793HD_Plate4_F04.CEL	AEC-10	Farm_AEC-10	10	Cobb400	yes	no	yes	yes	no	no	no	open	no	Natural	Automatic	Within premises	yes	Commercial broiler	no
AEC10CM4	Titan_EG0098_10793HD_Plate3_E02.CEL	AEC-10	Farm_AEC-10	10	Cobb400	yes	no	yes	yes	no	no	no	open	no	Natural	Automatic	Within premises	yes	Commercial broiler	no
AEC10CM5	Titan_EG0099_10793HD_Plate4_H04.CEL	AEC-10	Farm_AEC-10	10	Cobb400	yes	no	yes	yes	no	no	no	open	no	Natural	Automatic	Within premises	yes	Commercial broiler	no
AEC10CM6	Titan_EG0099_10793HD_Plate4_A05.CEL	AEC-10	Farm_AEC-10	10	Cobb400	yes	no	yes	yes	no	no	no	open	no	Natural	Automatic	Within premises	yes	Commercial broiler	no
AEC10CM7	Titan_EG0099_10793HD_Plate4_B05.CEL	AEC-10	Farm_AEC-10	10	Cobb400	yes	no	yes	yes	no	no	no	open	no	Natural	Automatic	Within premises	yes	Commercial broiler	no
AEC10CM8	Titan_EG0099_10793HD_Plate4_C05.CEL	AEC-10	Farm_AEC-10	10	Cobb400	yes	no	yes	yes	no	no	no	open	no	Natural	Automatic	Within premises	yes	Commercial broiler	no
AEC10CM9	Titan_EG0103_10793HD_Plate8_G12.CEL	AEC-10	Farm_AEC-10	10	Cobb400	yes	no	yes	yes	no	no	no	open	no	Natural	Automatic	Within premises	yes	Commercial broiler	no
AEC11CM1	Titan_EG0099_10793HD_Plate4_F10.CEL	AEC-11	Farm_AEC-11	11	Cobb400	yes	no	no	no	yes	no	yes	open	no	Natural	Automatic	Outside premises	yes	Commercial broiler	no
AEC11CM10	Titan_EG0099_10793HD_Plate4_G11.CEL	AEC-11	Farm_AEC-11	11	Cobb400	yes	no	no	no	yes	no	yes	open	no	Natural	Automatic	Outside premises	yes	Commercial broiler	no
AEC11CM2	Titan_EG0099_10793HD_Plate4_G10.CEL	AEC-11	Farm_AEC-11	11	Cobb400	yes	no	no	no	yes	no	yes	open	no	Natural	Automatic	Outside premises	yes	Commercial broiler	no
AEC11CM3	Titan_EG0099_10793HD_Plate4_H10.CEL	AEC-11	Farm_AEC-11	11	Cobb400	yes	no	no	no	yes	no	yes	open	no	Natural	Automatic	Outside premises	yes	Commercial broiler	no
AEC11CM4	Titan_EG0099_10793HD_Plate4_A11.CEL	AEC-11	Farm_AEC-11	11	Cobb400	yes	no	no	no	yes	no	yes	open	no	Natural	Automatic	Outside premises	yes	Commercial broiler	no
AEC11CM5	Titan_EG0099_10793HD_Plate4_B11.CEL	AEC-11	Farm_AEC-11	11	Cobb400	yes	no	no	no	yes	no	yes	open	no	Natural	Automatic	Outside premises	yes	Commercial broiler	no
AEC11CM6	Titan_EG0099_10793HD_Plate4_C11.CEL	AEC-11	Farm_AEC-11	11	Cobb400	yes	no	no	no	yes	no	yes	open	no	Natural	Automatic	Outside premises	yes	Commercial broiler	no
AEC11CM7	Titan_EG0099_10793HD_Plate4_D11.CEL	AEC-11	Farm_AEC-11	11	Cobb400	yes	no	no	no	yes	no	yes	open	no	Natural	Automatic	Outside premises	yes	Commercial broiler	no
AEC11CM8	Titan_EG0099_10793HD_Plate4_E11.CEL	AEC-11	Farm_AEC-11	11	Cobb400	yes	no	no	no	yes	no	yes	open	no	Natural	Automatic	Outside premises	yes	Commercial broiler	no
AEC11CM9	Titan_EG0099_10793HD_Plate4_F11.CEL	AEC-11	Farm_AEC-11	11	Cobb400	yes	no	no	no	yes	no	yes	open	no	Natural	Automatic	Outside premises	yes	Commercial broiler	no
AEC12CM1	Titan_EG0099_10793HD_Plate4_B08.CEL	AEC-12	Farm_AEC-12	12	Cobb400	yes	no	yes	yes	no	no	no	open	no	Natural	Automatic	Within premises	yes	Commercial broiler	no
AEC12CM10	Titan_EG0099_10793HD_Plate4_C09.CEL	AEC-12	Farm_AEC-12	12	Cobb400	yes	no	yes	yes	no	no	no	open	no	Natural	Automatic	Within premises	yes	Commercial broiler	no
AEC12CM2	Titan_EG0099_10793HD_Plate4_C08.CEL	AEC-12	Farm_AEC-12	12	Cobb400	yes	no	yes	yes	no	no	no	open	no	Natural	Automatic	Within premises	yes	Commercial broiler	no
AEC12CM3	Titan_EG0099_10793HD_Plate4_D08.CEL	AEC-12	Farm_AEC-12	12	Cobb400	yes	no	yes	yes	no	no	no	open	no	Natural	Automatic	Within premises	yes	Commercial broiler	no
AEC12CM4	Titan_EG0099_10793HD_Plate4_E08.CEL	AEC-12	Farm_AEC-12	12	Cobb400	yes	no	yes	yes	no	no	no	open	no	Natural	Automatic	Within premises	yes	Commercial broiler	no
AEC12CM5	Titan_EG0099_10793HD_Plate4_F08.CEL	AEC-12	Farm_AEC-12	12	Cobb400	yes	no	yes	yes	no	no	no	open	no	Natural	Automatic	Within premises	yes	Commercial broiler	no
AEC12CM6	Titan_EG0099_10793HD_Plate4_G08.CEL	AEC-12	Farm_AEC-12	12	Cobb400	yes	no	yes	yes	no	no	no	open	no	Natural	Automatic	Within premises	yes	Commercial broiler	no
AEC12CM7	Titan_EG0099_10793HD_Plate4_H08.CEL	AEC-12	Farm_AEC-12	12	Cobb400	yes	no	yes	yes	no	no	no	open	no	Natural	Automatic	Within premises	yes	Commercial broiler	no
AEC12CM8	Titan_EG0099_10793HD_Plate4_A09.CEL	AEC-12	Farm_AEC-12	12	Cobb400	yes	no	yes	yes	no	no	no	open	no	Natural	Automatic	Within premises	yes	Commercial broiler	no
AEC12CM9	Titan_EG0099_10793HD_Plate4_B09.CEL	AEC-12	Farm_AEC-12	12	Cobb400	yes	no	yes	yes	no	no	no	open	no	Natural	Automatic	Within premises	yes	Commercial broiler	no
AEC13CM10	Titan_EG0099_10793HD_Plate4_G06.CEL	AEC-13	Farm_AEC-13	13	Cobb400	yes	no	yes	no	no	no	no	open	no	Natural	Automatic	Outside premises	yes	Commercial broiler	no
AEC13CM2	Titan_EG0099_10793HD_Plate4_G05.CEL	AEC-13	Farm_AEC-13	13	Cobb400	yes	no	yes	no	no	no	no	open	no	Natural	Automatic	Outside premises	yes	Commercial broiler	no
AEC13CM3	Titan_EG0099_10793HD_Plate4_H05.CEL	AEC-13	Farm_AEC-13	13	Cobb400	yes	no	yes	no	no	no	no	open	no	Natural	Automatic	Outside premises	yes	Commercial broiler	no
AEC13CM4	Titan_EG0099_10793HD_Plate4_A06.CEL	AEC-13	Farm_AEC-13	13	Cobb400	yes	no	yes	no	no	no	no	open	no	Natural	Automatic	Outside premises	yes	Commercial broiler	no
AEC13CM5	Titan_EG0099_10793HD_Plate4_B06.CEL	AEC-13	Farm_AEC-13	13	Cobb400	yes	no	yes	no	no	no	no	open	no	Natural	Automatic	Outside premises	yes	Commercial broiler	no
AEC13CM6	Titan_EG0099_10793HD_Plate4_C06.CEL	AEC-13	Farm_AEC-13	13	Cobb400	yes	no	yes	no	no	no	no	open	no	Natural	Automatic	Outside premises	yes	Commercial broiler	no
AEC13CM7	Titan_EG0099_10793HD_Plate4_D06.CEL	AEC-13	Farm_AEC-13	13	Cobb400	yes	no	yes	no	no	no	no	open	no	Natural	Automatic	Outside premises	yes	Commercial broiler	no
AEC13CM8	Titan_EG0099_10793HD_Plate4_E06.CEL	AEC-13	Farm_AEC-13	13	Cobb400	yes	no	yes	no	no	no	no	open	no	Natural	Automatic	Outside premises	yes	Commercial broiler	no
AEC13CM9	Titan_EG0099_10793HD_Plate4_F06.CEL	AEC-13	Farm_AEC-13	13	Cobb400	yes	no	yes	no	no	no	no	open	no	Natural	Automatic	Outside premises	yes	Commercial broiler	no
AEC14CM1	Titan_EG0100_10793HD_Plate5_B01.CEL	AEC-14	Farm_AEC-14	14	Cobb400	yes	no	yes	no	no	no	no	open	yes	Artificial	Automatic	Within premises	yes	Commercial broiler	no
AEC14CM10	Titan_EG0100_10793HD_Plate5_C02.CEL	AEC-14	Farm_AEC-14	14	Cobb400	yes	no	yes	no	no	no	no	open	yes	Artificial	Automatic	Within premises	yes	Commercial broiler	no
AEC14CM2	Titan_EG0100_10793HD_Plate5_C01.CEL	AEC-14	Farm_AEC-14	14	Cobb400	yes	no	yes	no	no	no	no	open	yes	Artificial	Automatic	Within premises	yes	Commercial broiler	no
AEC14CM3	Titan_EG0100_10793HD_Plate5_D01.CEL	AEC-14	Farm_AEC-14	14	Cobb400	yes	no	yes	no	no	no	no	open	yes	Artificial	Automatic	Within premises	yes	Commercial broiler	no
AEC14CM4	Titan_EG0100_10793HD_Plate5_E01.CEL	AEC-14	Farm_AEC-14	14	Cobb400	yes	no	yes	no	no	no	no	open	yes	Artificial	Automatic	Within premises	yes	Commercial broiler	no
AEC14CM5	Titan_EG0100_10793HD_Plate5_F01.CEL	AEC-14	Farm_AEC-14	14	Cobb400	yes	no	yes	no	no	no	no	open	yes	Artificial	Automatic	Within premises	yes	Commercial broiler	no
AEC14CM6	Titan_EG0100_10793HD_Plate5_G01.CEL	AEC-14	Farm_AEC-14	14	Cobb400	yes	no	yes	no	no	no	no	open	yes	Artificial	Automatic	Within premises	yes	Commercial broiler	no
AEC14CM7	Titan_EG0100_10793HD_Plate5_H01.CEL	AEC-14	Farm_AEC-14	14	Cobb400	yes	no	yes	no	no	no	no	open	yes	Artificial	Automatic	Within premises	yes	Commercial broiler	no
AEC14CM8	Titan_EG0100_10793HD_Plate5_A02.CEL	AEC-14	Farm_AEC-14	14	Cobb400	yes	no	yes	no	no	no	no	open	yes	Artificial	Automatic	Within premises	yes	Commercial broiler	no
AEC14CM9	Titan_EG0100_10793HD_Plate5_B02.CEL	AEC-14	Farm_AEC-14	14	Cobb400	yes	no	yes	no	no	no	no	open	yes	Artificial	Automatic	Within premises	yes	Commercial broiler	no
AEC15CM1	Titan_EG0098_10793HD_Plate3_D11.CEL	AEC-15	Farm_AEC-15	15	Cobb400	yes	no	yes	yes	no	no	no	open	no	Natural	Automatic	Within premises	yes	Commercial broiler	no
AEC15CM10	Titan_EG0098_10793HD_Plate3_E12.CEL	AEC-15	Farm_AEC-15	15	Cobb400	yes	no	yes	yes	no	no	no	open	no	Natural	Automatic	Within premises	yes	Commercial broiler	no
AEC15CM3	Titan_EG0098_10793HD_Plate3_F11.CEL	AEC-15	Farm_AEC-15	15	Cobb400	yes	no	yes	yes	no	no	no	open	no	Natural	Automatic	Within premises	yes	Commercial broiler	no
AEC15CM4	Titan_EG0098_10793HD_Plate3_G11.CEL	AEC-15	Farm_AEC-15	15	Cobb400	yes	no	yes	yes	no	no	no	open	no	Natural	Automatic	Within premises	yes	Commercial broiler	no
AEC15CM5	Titan_EG0098_10793HD_Plate3_H11.CEL	AEC-15	Farm_AEC-15	15	Cobb400	yes	no	yes	yes	no	no	no	open	no	Natural	Automatic	Within premises	yes	Commercial broiler	no
AEC15CM6	Titan_EG0098_10793HD_Plate3_A12.CEL	AEC-15	Farm_AEC-15	15	Cobb400	yes	no	yes	yes	no	no	no	open	no	Natural	Automatic	Within premises	yes	Commercial broiler	no
AEC15CM7	Titan_EG0098_10793HD_Plate3_B12.CEL	AEC-15	Farm_AEC-15	15	Cobb400	yes	no	yes	yes	no	no	no	open	no	Natural	Automatic	Within premises	yes	Commercial broiler	no
AEC15CM8	Titan_EG0098_10793HD_Plate3_C12.CEL	AEC-15	Farm_AEC-15	15	Cobb400	yes	no	yes	yes	no	no	no	open	no	Natural	Automatic	Within premises	yes	Commercial broiler	no
AEC15CM9	Titan_EG0098_10793HD_Plate3_D12.CEL	AEC-15	Farm_AEC-15	15	Cobb400	yes	no	yes	yes	no	no	no	open	no	Natural	Automatic	Within premises	yes	Commercial broiler	no
AECK01CM1	Titan_EG0097_10793HD_Plate2_H02.CEL	AECK-01-K	Farm_AECK-01	1	Kada	yes	no	yes	yes	no	no	no	open	no	Natural	Automatic	Outside premises	yes	Kadaknath	no
AECK01CM10	Titan_EG0097_10793HD_Plate2_A04.CEL	AECK-01-C	Farm_AECK-01	1	Cobb400	yes	no	yes	yes	no	no	no	open	no	Natural	Automatic	Outside premises	yes	Commercial broiler	no
AECK01CM2	Titan_EG0097_10793HD_Plate2_A03.CEL	AECK-01-K	Farm_AECK-01	1	Kada	yes	no	yes	yes	no	no	no	open	no	Natural	Automatic	Outside premises	yes	Kadaknath	no
AECK01CM3	Titan_EG0097_10793HD_Plate2_B03.CEL	AECK-01-K	Farm_AECK-01	1	Kada	yes	no	yes	yes	no	no	no	open	no	Natural	Automatic	Outside premises	yes	Kadaknath	no
AECK01CM4	Titan_EG0097_10793HD_Plate2_C03.CEL	AECK-01-K	Farm_AECK-01	1	Kada	yes	no	yes	yes	no	no	no	open	no	Natural	Automatic	Outside premises	yes	Kadaknath	no
AECK01CM5	Titan_EG0097_10793HD_Plate2_D03.CEL	AECK-01-K	Farm_AECK-01	1	Kada	yes	no	yes	yes	no	no	no	open	no	Natural	Automatic	Outside premises	yes	Kadaknath	no
AECK01CM6	Titan_EG0097_10793HD_Plate2_E03.CEL	AECK-01-C	Farm_AECK-01	1	Cobb400	yes	no	yes	yes	no	no	no	open	no	Natural	Automatic	Outside premises	yes	Commercial broiler	no
AECK01CM7	Titan_EG0097_10793HD_Plate2_F03.CEL	AECK-01-C	Farm_AECK-01	1	Cobb400	yes	no	yes	yes	no	no	no	open	no	Natural	Automatic	Outside premises	yes	Commercial broiler	no
AECK01CM8	Titan_EG0097_10793HD_Plate2_G03.CEL	AECK-01-C	Farm_AECK-01	1	Cobb400	yes	no	yes	yes	no	no	no	open	no	Natural	Automatic	Outside premises	yes	Commercial broiler	no
AECK01CM9	Titan_EG0097_10793HD_Plate2_H03.CEL	AECK-01-C	Farm_AECK-01	1	Cobb400	yes	no	yes	yes	no	no	no	open	no	Natural	Automatic	Outside premises	yes	Commercial broiler	no
AECK02CM1	Titan_EG0097_10793HD_Plate2_B04.CEL	AECK-02-K	Farm_AECK-02	2	Kada	yes	no	yes	yes	no	no	no	open	no	Natural	Automatic	Outside premises	yes	Kadaknath	no
AECK02CM10	Titan_EG0097_10793HD_Plate2_B05.CEL	AECK-02-C	Farm_AECK-02	2	Cobb400	yes	no	yes	yes	no	no	no	open	no	Natural	Automatic	Outside premises	yes	Commercial broiler	no
AECK02CM2	Titan_EG0097_10793HD_Plate2_C04.CEL	AECK-02-K	Farm_AECK-02	2	Kada	yes	no	yes	yes	no	no	no	open	no	Natural	Automatic	Outside premises	yes	Kadaknath	no
AECK02CM3	Titan_EG0097_10793HD_Plate2_D04.CEL	AECK-02-K	Farm_AECK-02	2	Kada	yes	no	yes	yes	no	no	no	open	no	Natural	Automatic	Outside premises	yes	Kadaknath	no
AECK02CM4	Titan_EG0097_10793HD_Plate2_E04.CEL	AECK-02-K	Farm_AECK-02	2	Kada	yes	no	yes	yes	no	no	no	open	no	Natural	Automatic	Outside premises	yes	Kadaknath	no
AECK02CM5	Titan_EG0097_10793HD_Plate2_F04.CEL	AECK-02-K	Farm_AECK-02	2	Kada	yes	no	yes	yes	no	no	no	open	no	Natural	Automatic	Outside premises	yes	Kadaknath	no
AECK02CM6	Titan_EG0097_10793HD_Plate2_G04.CEL	AECK-02-C	Farm_AECK-02	2	Cobb400	yes	no	yes	yes	no	no	no	open	no	Natural	Automatic	Outside premises	yes	Commercial broiler	no
AECK02CM7	Titan_EG0100_10793HD_Plate5_A12.CEL	AECK-02-C	Farm_AECK-02	2	Cobb400	yes	no	yes	yes	no	no	no	open	no	Natural	Automatic	Outside premises	yes	Commercial broiler	no
AECK02CM8	Titan_EG0097_10793HD_Plate2_H04.CEL	AECK-02-C	Farm_AECK-02	2	Cobb400	yes	no	yes	yes	no	no	no	open	no	Natural	Automatic	Outside premises	yes	Commercial broiler	no
AECK02CM9	Titan_EG0097_10793HD_Plate2_A05.CEL	AECK-02-C	Farm_AECK-02	2	Cobb400	yes	no	yes	yes	no	no	no	open	no	Natural	Automatic	Outside premises	yes	Commercial broiler	no
AECK03CM1	Titan_EG0097_10793HD_Plate2_C05.CEL	AECK-03-K	Farm_AECK-03	3	Kada	yes	no	yes	yes	no	no	no	open	no	Natural	Automatic	Within premises	yes	Kadaknath	no
AECK03CM10	Titan_EG0097_10793HD_Plate2_D06.CEL	AECK-03-C	Farm_AECK-03	3	Cobb400	yes	no	yes	yes	no	no	no	open	no	Natural	Automatic	Within premises	yes	Commercial broiler	no
AECK03CM2	Titan_EG0097_10793HD_Plate2_D05.CEL	AECK-03-K	Farm_AECK-03	3	Kada	yes	no	yes	yes	no	no	no	open	no	Natural	Automatic	Within premises	yes	Kadaknath	no
AECK03CM3	Titan_EG0097_10793HD_Plate2_E05.CEL	AECK-03-K	Farm_AECK-03	3	Kada	yes	no	yes	yes	no	no	no	open	no	Natural	Automatic	Within premises	yes	Kadaknath	no
AECK03CM4	Titan_EG0097_10793HD_Plate2_F05.CEL	AECK-03-K	Farm_AECK-03	3	Kada	yes	no	yes	yes	no	no	no	open	no	Natural	Automatic	Within premises	yes	Kadaknath	no
AECK03CM5	Titan_EG0097_10793HD_Plate2_G05.CEL	AECK-03-K	Farm_AECK-03	3	Kada	yes	no	yes	yes	no	no	no	open	no	Natural	Automatic	Within premises	yes	Kadaknath	no
AECK03CM6	Titan_EG0097_10793HD_Plate2_H05.CEL	AECK-03-C	Farm_AECK-03	3	Cobb400	yes	no	yes	yes	no	no	no	open	no	Natural	Automatic	Within premises	yes	Commercial broiler	no
AECK03CM7	Titan_EG0097_10793HD_Plate2_A06.CEL	AECK-03-C	Farm_AECK-03	3	Cobb400	yes	no	yes	yes	no	no	no	open	no	Natural	Automatic	Within premises	yes	Commercial broiler	no
AECK03CM8	Titan_EG0097_10793HD_Plate2_B06.CEL	AECK-03-C	Farm_AECK-03	3	Cobb400	yes	no	yes	yes	no	no	no	open	no	Natural	Automatic	Within premises	yes	Commercial broiler	no
AECK03CM9	Titan_EG0097_10793HD_Plate2_C06.CEL	AECK-03-C	Farm_AECK-03	3	Cobb400	yes	no	yes	yes	no	no	no	open	no	Natural	Automatic	Within premises	yes	Commercial broiler	no
AECK04CM1	Titan_EG0097_10793HD_Plate2_F01.CEL	AECK-04-K	Farm_AECK-04	4	Kada	yes	no	yes	yes	no	no	yes	open	no	Natural	Automatic	Outside premises	yes	Kadaknath	no
AECK04CM10	Titan_EG0097_10793HD_Plate2_G02.CEL	AECK-04-C	Farm_AECK-04	4	Cobb400	yes	no	yes	yes	no	no	yes	open	no	Natural	Automatic	Outside premises	yes	Commercial broiler	no
AECK04CM2	Titan_EG0097_10793HD_Plate2_G01.CEL	AECK-04-K	Farm_AECK-04	4	Kada	yes	no	yes	yes	no	no	yes	open	no	Natural	Automatic	Outside premises	yes	Kadaknath	no
AECK04CM3	Titan_EG0097_10793HD_Plate2_H01.CEL	AECK-04-K	Farm_AECK-04	4	Kada	yes	no	yes	yes	no	no	yes	open	no	Natural	Automatic	Outside premises	yes	Kadaknath	no
AECK04CM4	Titan_EG0097_10793HD_Plate2_A02.CEL	AECK-04-K	Farm_AECK-04	4	Kada	yes	no	yes	yes	no	no	yes	open	no	Natural	Automatic	Outside premises	yes	Kadaknath	no
AECK04CM5	Titan_EG0097_10793HD_Plate2_B02.CEL	AECK-04-K	Farm_AECK-04	4	Kada	yes	no	yes	yes	no	no	yes	open	no	Natural	Automatic	Outside premises	yes	Kadaknath	no
AECK04CM6	Titan_EG0097_10793HD_Plate2_C02.CEL	AECK-04-C	Farm_AECK-04	4	Cobb400	yes	no	yes	yes	no	no	yes	open	no	Natural	Automatic	Outside premises	yes	Commercial broiler	no
AECK04CM7	Titan_EG0097_10793HD_Plate2_D02.CEL	AECK-04-C	Farm_AECK-04	4	Cobb400	yes	no	yes	yes	no	no	yes	open	no	Natural	Automatic	Outside premises	yes	Commercial broiler	no
AECK04CM8	Titan_EG0097_10793HD_Plate2_E02.CEL	AECK-04-C	Farm_AECK-04	4	Cobb400	yes	no	yes	yes	no	no	yes	open	no	Natural	Automatic	Outside premises	yes	Commercial broiler	no
AECK04CM9	Titan_EG0097_10793HD_Plate2_F02.CEL	AECK-04-C	Farm_AECK-04	4	Cobb400	yes	no	yes	yes	no	no	yes	open	no	Natural	Automatic	Outside premises	yes	Commercial broiler	no
AECK05CM1	Titan_EG0097_10793HD_Plate2_E06.CEL	AECK-05-K	Farm_AECK-05	5	Kada	yes	no	yes	yes	no	no	no	open	no	Natural	Automatic	Outside premises	yes	Kadaknath	no
AECK05CM10	Titan_EG0097_10793HD_Plate2_F07.CEL	AECK-05-C	Farm_AECK-05	5	Cobb400	yes	no	yes	yes	no	no	no	open	no	Natural	Automatic	Outside premises	yes	Commercial broiler	no
AECK05CM2	Titan_EG0097_10793HD_Plate2_F06.CEL	AECK-05-K	Farm_AECK-05	5	Kada	yes	no	yes	yes	no	no	no	open	no	Natural	Automatic	Outside premises	yes	Kadaknath	no
AECK05CM3	Titan_EG0097_10793HD_Plate2_G06.CEL	AECK-05-K	Farm_AECK-05	5	Kada	yes	no	yes	yes	no	no	no	open	no	Natural	Automatic	Outside premises	yes	Kadaknath	no
AECK05CM4	Titan_EG0097_10793HD_Plate2_H06.CEL	AECK-05-K	Farm_AECK-05	5	Kada	yes	no	yes	yes	no	no	no	open	no	Natural	Automatic	Outside premises	yes	Kadaknath	no
AECK05CM5	Titan_EG0097_10793HD_Plate2_A07.CEL	AECK-05-K	Farm_AECK-05	5	Kada	yes	no	yes	yes	no	no	no	open	no	Natural	Automatic	Outside premises	yes	Kadaknath	no
AECK05CM6	Titan_EG0097_10793HD_Plate2_B07.CEL	AECK-05-C	Farm_AECK-05	5	Cobb400	yes	no	yes	yes	no	no	no	open	no	Natural	Automatic	Outside premises	yes	Commercial broiler	no
AECK05CM7	Titan_EG0097_10793HD_Plate2_C07.CEL	AECK-05-C	Farm_AECK-05	5	Cobb400	yes	no	yes	yes	no	no	no	open	no	Natural	Automatic	Outside premises	yes	Commercial broiler	no
AECK05CM8	Titan_EG0097_10793HD_Plate2_D07.CEL	AECK-05-C	Farm_AECK-05	5	Cobb400	yes	no	yes	yes	no	no	no	open	no	Natural	Automatic	Outside premises	yes	Commercial broiler	no
AECK05CM9	Titan_EG0097_10793HD_Plate2_E07.CEL	AECK-05-C	Farm_AECK-05	5	Cobb400	yes	no	yes	yes	no	no	no	open	no	Natural	Automatic	Outside premises	yes	Commercial broiler	no
AECK06CM1	Titan_EG0097_10793HD_Plate2_G07.CEL	AECK-06-K	Farm_AECK-06	6	Kada	yes	no	yes	yes	no	no	yes	open	no	Natural	Automatic	Within premises	yes	Kadaknath	no
AECK06CM10	Titan_EG0098_10793HD_Plate3_C01.CEL	AECK-06-C	Farm_AECK-06	6	Cobb400	yes	no	yes	yes	no	no	yes	open	no	Natural	Automatic	Within premises	yes	Commercial broiler	no
AECK06CM2	Titan_EG0097_10793HD_Plate2_H07.CEL	AECK-06-K	Farm_AECK-06	6	Kada	yes	no	yes	yes	no	no	yes	open	no	Natural	Automatic	Within premises	yes	Kadaknath	no
AECK06CM3	Titan_EG0097_10793HD_Plate2_A08.CEL	AECK-06-K	Farm_AECK-06	6	Kada	yes	no	yes	yes	no	no	yes	open	no	Natural	Automatic	Within premises	yes	Kadaknath	no
AECK06CM4	Titan_EG0097_10793HD_Plate2_B08.CEL	AECK-06-K	Farm_AECK-06	6	Kada	yes	no	yes	yes	no	no	yes	open	no	Natural	Automatic	Within premises	yes	Kadaknath	no
AECK06CM5	Titan_EG0097_10793HD_Plate2_C08.CEL	AECK-06-K	Farm_AECK-06	6	Kada	yes	no	yes	yes	no	no	yes	open	no	Natural	Automatic	Within premises	yes	Kadaknath	no
AECK06CM6	Titan_EG0097_10793HD_Plate2_H10.CEL	AECK-06-C	Farm_AECK-06	6	Cobb400	yes	no	yes	yes	no	no	yes	open	no	Natural	Automatic	Within premises	yes	Commercial broiler	no
AECK06CM7	Titan_EG0097_10793HD_Plate2_E08.CEL	AECK-06-C	Farm_AECK-06	6	Cobb400	yes	no	yes	yes	no	no	yes	open	no	Natural	Automatic	Within premises	yes	Commercial broiler	no
AECK06CM8	Titan_EG0098_10793HD_Plate3_A01.CEL	AECK-06-C	Farm_AECK-06	6	Cobb400	yes	no	yes	yes	no	no	yes	open	no	Natural	Automatic	Within premises	yes	Commercial broiler	no
AECK06CM9	Titan_EG0098_10793HD_Plate3_B01.CEL	AECK-06-C	Farm_AECK-06	6	Cobb400	yes	no	yes	yes	no	no	yes	open	no	Natural	Automatic	Within premises	yes	Commercial broiler	no
AECK07CM1	Titan_EG0098_10793HD_Plate3_B05.CEL	AECK-07-K	Farm_AECK-07	7	Kada	yes	no	no	yes	no	no	no	open	no	Natural	Automatic	Within premises	yes	Kadaknath	no
AECK07CM10	Titan_EG0098_10793HD_Plate3_C06.CEL	AECK-07-C	Farm_AECK-07	7	Cobb400	yes	no	no	yes	no	no	no	open	no	Natural	Automatic	Within premises	yes	Commercial broiler	no
AECK07CM2	Titan_EG0098_10793HD_Plate3_C05.CEL	AECK-07-K	Farm_AECK-07	7	Kada	yes	no	no	yes	no	no	no	open	no	Natural	Automatic	Within premises	yes	Kadaknath	no
AECK07CM3	Titan_EG0098_10793HD_Plate3_D05.CEL	AECK-07-K	Farm_AECK-07	7	Kada	yes	no	no	yes	no	no	no	open	no	Natural	Automatic	Within premises	yes	Kadaknath	no
AECK07CM4	Titan_EG0098_10793HD_Plate3_E05.CEL	AECK-07-K	Farm_AECK-07	7	Kada	yes	no	no	yes	no	no	no	open	no	Natural	Automatic	Within premises	yes	Kadaknath	no
AECK07CM5	Titan_EG0098_10793HD_Plate3_F05.CEL	AECK-07-K	Farm_AECK-07	7	Kada	yes	no	no	yes	no	no	no	open	no	Natural	Automatic	Within premises	yes	Kadaknath	no
AECK07CM6	Titan_EG0098_10793HD_Plate3_G05.CEL	AECK-07-C	Farm_AECK-07	7	Cobb400	yes	no	no	yes	no	no	no	open	no	Natural	Automatic	Within premises	yes	Commercial broiler	no
AECK07CM7	Titan_EG0098_10793HD_Plate3_H05.CEL	AECK-07-C	Farm_AECK-07	7	Cobb400	yes	no	no	yes	no	no	no	open	no	Natural	Automatic	Within premises	yes	Commercial broiler	no
AECK07CM8	Titan_EG0098_10793HD_Plate3_A06.CEL	AECK-07-C	Farm_AECK-07	7	Cobb400	yes	no	no	yes	no	no	no	open	no	Natural	Automatic	Within premises	yes	Commercial broiler	no
AECK07CM9	Titan_EG0098_10793HD_Plate3_B06.CEL	AECK-07-C	Farm_AECK-07	7	Cobb400	yes	no	no	yes	no	no	no	open	no	Natural	Automatic	Within premises	yes	Commercial broiler	no
AECK08CM1	Titan_EG0098_10793HD_Plate3_D01.CEL	AECK-08-K	Farm_AECK-08	8	Kada	no	yes	no	no	yes	yes	yes	Enclosed	yes	Natural	Manual	Outside premises	yes	Kadaknath	no
AECK08CM10	Titan_EG0097_10793HD_Plate2_A11.CEL	AECK-08-C	Farm_AECK-08	8	Cobb400	no	yes	no	no	yes	yes	yes	Enclosed	yes	Natural	Manual	Outside premises	yes	Commercial broiler	no
AECK08CM2	Titan_EG0098_10793HD_Plate3_E01.CEL	AECK-08-K	Farm_AECK-08	8	Kada	no	yes	no	no	yes	yes	yes	Enclosed	yes	Natural	Manual	Outside premises	yes	Kadaknath	no
AECK08CM3	Titan_EG0098_10793HD_Plate3_F01.CEL	AECK-08-K	Farm_AECK-08	8	Kada	no	yes	no	no	yes	yes	yes	Enclosed	yes	Natural	Manual	Outside premises	yes	Kadaknath	no
AECK08CM4	Titan_EG0098_10793HD_Plate3_G01.CEL	AECK-08-K	Farm_AECK-08	8	Kada	no	yes	no	no	yes	yes	yes	Enclosed	yes	Natural	Manual	Outside premises	yes	Kadaknath	no
AECK08CM5	Titan_EG0098_10793HD_Plate3_H01.CEL	AECK-08-K	Farm_AECK-08	8	Kada	no	yes	no	no	yes	yes	yes	Enclosed	yes	Natural	Manual	Outside premises	yes	Kadaknath	no
AECK08CM6	Titan_EG0098_10793HD_Plate3_A02.CEL	AECK-08-C	Farm_AECK-08	8	Cobb400	no	yes	no	no	yes	yes	yes	Enclosed	yes	Natural	Manual	Outside premises	yes	Commercial broiler	no
AECK08CM7	Titan_EG0098_10793HD_Plate3_B02.CEL	AECK-08-C	Farm_AECK-08	8	Cobb400	no	yes	no	no	yes	yes	yes	Enclosed	yes	Natural	Manual	Outside premises	yes	Commercial broiler	no
AECK08CM8	Titan_EG0098_10793HD_Plate3_C02.CEL	AECK-08-C	Farm_AECK-08	8	Cobb400	no	yes	no	no	yes	yes	yes	Enclosed	yes	Natural	Manual	Outside premises	yes	Commercial broiler	no
AECK08CM9	Titan_EG0098_10793HD_Plate3_D02.CEL	AECK-08-C	Farm_AECK-08	8	Cobb400	no	yes	no	no	yes	yes	yes	Enclosed	yes	Natural	Manual	Outside premises	yes	Commercial broiler	no
AECK09CM1	Titan_EG0098_10793HD_Plate3_F02.CEL	AECK-09-K	Farm_AECK-09	9	Kada	no	yes	no	no	yes	yes	yes	Enclosed	yes	Natural	Manual	Outside premises	yes	Kadaknath	no
AECK09CM10	Titan_EG0098_10793HD_Plate3_G03.CEL	AECK-09-C	Farm_AECK-09	9	Cobb400	no	yes	no	no	yes	yes	yes	Enclosed	yes	Natural	Manual	Outside premises	yes	Commercial broiler	no
AECK09CM2	Titan_EG0098_10793HD_Plate3_G02.CEL	AECK-09-K	Farm_AECK-09	9	Kada	no	yes	no	no	yes	yes	yes	Enclosed	yes	Natural	Manual	Outside premises	yes	Kadaknath	no
AECK09CM3	Titan_EG0098_10793HD_Plate3_H02.CEL	AECK-09-K	Farm_AECK-09	9	Kada	no	yes	no	no	yes	yes	yes	Enclosed	yes	Natural	Manual	Outside premises	yes	Kadaknath	no
AECK09CM4	Titan_EG0098_10793HD_Plate3_A03.CEL	AECK-09-K	Farm_AECK-09	9	Kada	no	yes	no	no	yes	yes	yes	Enclosed	yes	Natural	Manual	Outside premises	yes	Kadaknath	no
AECK09CM5	Titan_EG0098_10793HD_Plate3_B03.CEL	AECK-09-K	Farm_AECK-09	9	Kada	no	yes	no	no	yes	yes	yes	Enclosed	yes	Natural	Manual	Outside premises	yes	Kadaknath	no
AECK09CM6	Titan_EG0098_10793HD_Plate3_C03.CEL	AECK-09-C	Farm_AECK-09	9	Cobb400	no	yes	no	no	yes	yes	yes	Enclosed	yes	Natural	Manual	Outside premises	yes	Commercial broiler	no
AECK09CM7	Titan_EG0098_10793HD_Plate3_D03.CEL	AECK-09-C	Farm_AECK-09	9	Cobb400	no	yes	no	no	yes	yes	yes	Enclosed	yes	Natural	Manual	Outside premises	yes	Commercial broiler	no
AECK09CM8	Titan_EG0098_10793HD_Plate3_E03.CEL	AECK-09-C	Farm_AECK-09	9	Cobb400	no	yes	no	no	yes	yes	yes	Enclosed	yes	Natural	Manual	Outside premises	yes	Commercial broiler	no
AECK09CM9	Titan_EG0098_10793HD_Plate3_F03.CEL	AECK-09-C	Farm_AECK-09	9	Cobb400	no	yes	no	no	yes	yes	yes	Enclosed	yes	Natural	Manual	Outside premises	yes	Commercial broiler	no
AECK10CM1	Titan_EG0098_10793HD_Plate3_H03.CEL	AECK-10-K	Farm_AECK-10	10	Kada	no	yes	no	no	yes	yes	yes	Enclosed	yes	Natural	Manual	Outside premises	yes	Kadaknath	no
AECK10CM10	Titan_EG0098_10793HD_Plate3_A05.CEL	AECK-10-C	Farm_AECK-10	10	Cobb400	no	yes	no	no	yes	yes	yes	Enclosed	yes	Natural	Manual	Outside premises	yes	Commercial broiler	no
AECK10CM2	Titan_EG0098_10793HD_Plate3_A04.CEL	AECK-10-K	Farm_AECK-10	10	Kada	no	yes	no	no	yes	yes	yes	Enclosed	yes	Natural	Manual	Outside premises	yes	Kadaknath	no
AECK10CM3	Titan_EG0098_10793HD_Plate3_B04.CEL	AECK-10-K	Farm_AECK-10	10	Kada	no	yes	no	no	yes	yes	yes	Enclosed	yes	Natural	Manual	Outside premises	yes	Kadaknath	no
AECK10CM4	Titan_EG0098_10793HD_Plate3_C04.CEL	AECK-10-K	Farm_AECK-10	10	Kada	no	yes	no	no	yes	yes	yes	Enclosed	yes	Natural	Manual	Outside premises	yes	Kadaknath	no
AECK10CM5	Titan_EG0098_10793HD_Plate3_D04.CEL	AECK-10-K	Farm_AECK-10	10	Kada	no	yes	no	no	yes	yes	yes	Enclosed	yes	Natural	Manual	Outside premises	yes	Kadaknath	no
AECK10CM6	Titan_EG0098_10793HD_Plate3_E04.CEL	AECK-10-C	Farm_AECK-10	10	Cobb400	no	yes	no	no	yes	yes	yes	Enclosed	yes	Natural	Manual	Outside premises	yes	Commercial broiler	no
AECK10CM7	Titan_EG0098_10793HD_Plate3_F04.CEL	AECK-10-C	Farm_AECK-10	10	Cobb400	no	yes	no	no	yes	yes	yes	Enclosed	yes	Natural	Manual	Outside premises	yes	Commercial broiler	no
AECK10CM8	Titan_EG0098_10793HD_Plate3_G04.CEL	AECK-10-C	Farm_AECK-10	10	Cobb400	no	yes	no	no	yes	yes	yes	Enclosed	yes	Natural	Manual	Outside premises	yes	Commercial broiler	no
AECK10CM9	Titan_EG0098_10793HD_Plate3_H04.CEL	AECK-10-C	Farm_AECK-10	10	Cobb400	no	yes	no	no	yes	yes	yes	Enclosed	yes	Natural	Manual	Outside premises	yes	Commercial broiler	no
AECK11CM1	Titan_EG0098_10793HD_Plate3_B10.CEL	AECK-11-K	Farm_AECK-11	11	Kada	no	yes	no	no	yes	yes	yes	Enclosed	yes	Natural	Manual	Outside premises	yes	Kadaknath	yes
AECK11CM10	Titan_EG0098_10793HD_Plate3_C11.CEL	AECK-11-C	Farm_AECK-11	11	Cobb400	no	yes	no	no	yes	yes	yes	Enclosed	yes	Natural	Manual	Outside premises	yes	Commercial broiler	yes
AECK11CM2	Titan_EG0098_10793HD_Plate3_C10.CEL	AECK-11-K	Farm_AECK-11	11	Kada	no	yes	no	no	yes	yes	yes	Enclosed	yes	Natural	Manual	Outside premises	yes	Kadaknath	yes
AECK11CM3	Titan_EG0098_10793HD_Plate3_D10.CEL	AECK-11-K	Farm_AECK-11	11	Kada	no	yes	no	no	yes	yes	yes	Enclosed	yes	Natural	Manual	Outside premises	yes	Kadaknath	yes
AECK11CM4	Titan_EG0098_10793HD_Plate3_E10.CEL	AECK-11-K	Farm_AECK-11	11	Kada	no	yes	no	no	yes	yes	yes	Enclosed	yes	Natural	Manual	Outside premises	yes	Kadaknath	yes
AECK11CM5	Titan_EG0098_10793HD_Plate3_F10.CEL	AECK-11-K	Farm_AECK-11	11	Kada	no	yes	no	no	yes	yes	yes	Enclosed	yes	Natural	Manual	Outside premises	yes	Kadaknath	yes
AECK11CM6	Titan_EG0098_10793HD_Plate3_G10.CEL	AECK-11-C	Farm_AECK-11	11	Cobb400	no	yes	no	no	yes	yes	yes	Enclosed	yes	Natural	Manual	Outside premises	yes	Commercial broiler	yes
AECK11CM7	Titan_EG0098_10793HD_Plate3_H10.CEL	AECK-11-C	Farm_AECK-11	11	Cobb400	no	yes	no	no	yes	yes	yes	Enclosed	yes	Natural	Manual	Outside premises	yes	Commercial broiler	yes
AECK11CM8	Titan_EG0098_10793HD_Plate3_A11.CEL	AECK-11-C	Farm_AECK-11	11	Cobb400	no	yes	no	no	yes	yes	yes	Enclosed	yes	Natural	Manual	Outside premises	yes	Commercial broiler	yes
AECK11CM9	Titan_EG0098_10793HD_Plate3_B11.CEL	AECK-11-C	Farm_AECK-11	11	Cobb400	no	yes	no	no	yes	yes	yes	Enclosed	yes	Natural	Manual	Outside premises	yes	Commercial broiler	yes
AECK12CM1	Titan_EG0098_10793HD_Plate3_F07.CEL	AECK-12-K	Farm_AECK-12	12	Kada	no	yes	no	no	yes	yes	yes	Enclosed	yes	Natural	Manual	Outside premises	yes	Kadaknath	yes
AECK12CM10	Titan_EG0098_10793HD_Plate3_G08.CEL	AECK-12-C	Farm_AECK-12	12	Cobb400	no	yes	no	no	yes	yes	yes	Enclosed	yes	Natural	Manual	Outside premises	yes	Commercial broiler	yes
AECK12CM2	Titan_EG0098_10793HD_Plate3_G07.CEL	AECK-12-K	Farm_AECK-12	12	Kada	no	yes	no	no	yes	yes	yes	Enclosed	yes	Natural	Manual	Outside premises	yes	Kadaknath	yes
AECK12CM3	Titan_EG0098_10793HD_Plate3_H07.CEL	AECK-12-K	Farm_AECK-12	12	Kada	no	yes	no	no	yes	yes	yes	Enclosed	yes	Natural	Manual	Outside premises	yes	Kadaknath	yes
AECK12CM4	Titan_EG0098_10793HD_Plate3_A08.CEL	AECK-12-K	Farm_AECK-12	12	Kada	no	yes	no	no	yes	yes	yes	Enclosed	yes	Natural	Manual	Outside premises	yes	Kadaknath	yes
AECK12CM5	Titan_EG0098_10793HD_Plate3_B08.CEL	AECK-12-K	Farm_AECK-12	12	Kada	no	yes	no	no	yes	yes	yes	Enclosed	yes	Natural	Manual	Outside premises	yes	Kadaknath	yes
AECK12CM6	Titan_EG0098_10793HD_Plate3_C08.CEL	AECK-12-C	Farm_AECK-12	12	Cobb400	no	yes	no	no	yes	yes	yes	Enclosed	yes	Natural	Manual	Outside premises	yes	Commercial broiler	yes
AECK12CM7	Titan_EG0098_10793HD_Plate3_D08.CEL	AECK-12-C	Farm_AECK-12	12	Cobb400	no	yes	no	no	yes	yes	yes	Enclosed	yes	Natural	Manual	Outside premises	yes	Commercial broiler	yes
AECK12CM8	Titan_EG0098_10793HD_Plate3_E08.CEL	AECK-12-C	Farm_AECK-12	12	Cobb400	no	yes	no	no	yes	yes	yes	Enclosed	yes	Natural	Manual	Outside premises	yes	Commercial broiler	yes
AECK12CM9	Titan_EG0098_10793HD_Plate3_F08.CEL	AECK-12-C	Farm_AECK-12	12	Cobb400	no	yes	no	no	yes	yes	yes	Enclosed	yes	Natural	Manual	Outside premises	yes	Commercial broiler	yes
AECK13CM1	Titan_EG0098_10793HD_Plate3_D06.CEL	AECK-13-K	Farm_AECK-13	13	Kada	no	yes	no	no	yes	yes	yes	Enclosed	yes	Natural	Manual	Outside premises	yes	Kadaknath	no
AECK13CM10	Titan_EG0098_10793HD_Plate3_E07.CEL	AECK-13-C	Farm_AECK-13	13	Cobb400	no	yes	no	no	yes	yes	yes	Enclosed	yes	Natural	Manual	Outside premises	yes	Commercial broiler	no
AECK13CM2	Titan_EG0098_10793HD_Plate3_E06.CEL	AECK-13-K	Farm_AECK-13	13	Kada	no	yes	no	no	yes	yes	yes	Enclosed	yes	Natural	Manual	Outside premises	yes	Kadaknath	no
AECK13CM3	Titan_EG0098_10793HD_Plate3_F06.CEL	AECK-13-K	Farm_AECK-13	13	Kada	no	yes	no	no	yes	yes	yes	Enclosed	yes	Natural	Manual	Outside premises	yes	Kadaknath	no
AECK13CM4	Titan_EG0098_10793HD_Plate3_G06.CEL	AECK-13-K	Farm_AECK-13	13	Kada	no	yes	no	no	yes	yes	yes	Enclosed	yes	Natural	Manual	Outside premises	yes	Kadaknath	no
AECK13CM5	Titan_EG0098_10793HD_Plate3_H06.CEL	AECK-13-K	Farm_AECK-13	13	Kada	no	yes	no	no	yes	yes	yes	Enclosed	yes	Natural	Manual	Outside premises	yes	Kadaknath	no
AECK13CM6	Titan_EG0098_10793HD_Plate3_A07.CEL	AECK-13-C	Farm_AECK-13	13	Cobb400	no	yes	no	no	yes	yes	yes	Enclosed	yes	Natural	Manual	Outside premises	yes	Commercial broiler	no
AECK13CM7	Titan_EG0098_10793HD_Plate3_B07.CEL	AECK-13-C	Farm_AECK-13	13	Cobb400	no	yes	no	no	yes	yes	yes	Enclosed	yes	Natural	Manual	Outside premises	yes	Commercial broiler	no
AECK13CM8	Titan_EG0098_10793HD_Plate3_C07.CEL	AECK-13-C	Farm_AECK-13	13	Cobb400	no	yes	no	no	yes	yes	yes	Enclosed	yes	Natural	Manual	Outside premises	yes	Commercial broiler	no
AECK13CM9	Titan_EG0098_10793HD_Plate3_D07.CEL	AECK-13-C	Farm_AECK-13	13	Cobb400	no	yes	no	no	yes	yes	yes	Enclosed	yes	Natural	Manual	Outside premises	yes	Commercial broiler	no
AECK14CM1	Titan_EG0102_10793HD_Plate7_A01.CEL	AECK-14-K	Farm_AECK-14	14	Kada	no	no	no	no	no	no	no	Enclosed	no	Artificial	Manual	Within premises	no	Kadaknath	no
AECK14CM10	Titan_EG0102_10793HD_Plate7_B02.CEL	AECK-14-C	Farm_AECK-14	14	Cobb400	no	no	no	no	no	no	no	Enclosed	no	Artificial	Manual	Within premises	no	Commercial broiler	no
AECK14CM2	Titan_EG0102_10793HD_Plate7_B01.CEL	AECK-14-K	Farm_AECK-14	14	Kada	no	no	no	no	no	no	no	Enclosed	no	Artificial	Manual	Within premises	no	Kadaknath	no
AECK14CM3	Titan_EG0102_10793HD_Plate7_C01.CEL	AECK-14-K	Farm_AECK-14	14	Kada	no	no	no	no	no	no	no	Enclosed	no	Artificial	Manual	Within premises	no	Kadaknath	no
AECK14CM4	Titan_EG0102_10793HD_Plate7_D01.CEL	AECK-14-K	Farm_AECK-14	14	Kada	no	no	no	no	no	no	no	Enclosed	no	Artificial	Manual	Within premises	no	Kadaknath	no
AECK14CM5	Titan_EG0102_10793HD_Plate7_E01.CEL	AECK-14-K	Farm_AECK-14	14	Kada	no	no	no	no	no	no	no	Enclosed	no	Artificial	Manual	Within premises	no	Kadaknath	no
AECK14CM6	Titan_EG0102_10793HD_Plate7_F01.CEL	AECK-14-C	Farm_AECK-14	14	Cobb400	no	no	no	no	no	no	no	Enclosed	no	Artificial	Manual	Within premises	no	Commercial broiler	no
AECK14CM7	Titan_EG0102_10793HD_Plate7_G01.CEL	AECK-14-C	Farm_AECK-14	14	Cobb400	no	no	no	no	no	no	no	Enclosed	no	Artificial	Manual	Within premises	no	Commercial broiler	no
AECK14CM8	Titan_EG0102_10793HD_Plate7_H01.CEL	AECK-14-C	Farm_AECK-14	14	Cobb400	no	no	no	no	no	no	no	Enclosed	no	Artificial	Manual	Within premises	no	Commercial broiler	no
AECK14CM9	Titan_EG0102_10793HD_Plate7_A02.CEL	AECK-14-C	Farm_AECK-14	14	Cobb400	no	no	no	no	no	no	no	Enclosed	no	Artificial	Manual	Within premises	no	Commercial broiler	no
AECK15CM1	Titan_EG0101_10793HD_Plate6_A08.CEL	AECK-15-K	Farm_AECK-15	15	Kada	no	no	no	no	no	no	no	Enclosed	no	Artificial	Manual	Within premises	no	Kadaknath	no
AECK15CM10	Titan_EG0101_10793HD_Plate6_B09.CEL	AECK-15-C	Farm_AECK-15	15	Cobb400	no	no	no	no	no	no	no	Enclosed	no	Artificial	Manual	Within premises	no	Commercial broiler	no
AECK15CM2	Titan_EG0101_10793HD_Plate6_B08.CEL	AECK-15-K	Farm_AECK-15	15	Kada	no	no	no	no	no	no	no	Enclosed	no	Artificial	Manual	Within premises	no	Kadaknath	no
AECK15CM3	Titan_EG0101_10793HD_Plate6_C08.CEL	AECK-15-K	Farm_AECK-15	15	Kada	no	no	no	no	no	no	no	Enclosed	no	Artificial	Manual	Within premises	no	Kadaknath	no
AECK15CM4	Titan_EG0101_10793HD_Plate6_D08.CEL	AECK-15-K	Farm_AECK-15	15	Kada	no	no	no	no	no	no	no	Enclosed	no	Artificial	Manual	Within premises	no	Kadaknath	no
AECK15CM5	Titan_EG0101_10793HD_Plate6_E08.CEL	AECK-15-K	Farm_AECK-15	15	Kada	no	no	no	no	no	no	no	Enclosed	no	Artificial	Manual	Within premises	no	Kadaknath	no
AECK15CM6	Titan_EG0101_10793HD_Plate6_F08.CEL	AECK-15-C	Farm_AECK-15	15	Cobb400	no	no	no	no	no	no	no	Enclosed	no	Artificial	Manual	Within premises	no	Commercial broiler	no
AECK15CM7	Titan_EG0101_10793HD_Plate6_G08.CEL	AECK-15-C	Farm_AECK-15	15	Cobb400	no	no	no	no	no	no	no	Enclosed	no	Artificial	Manual	Within premises	no	Commercial broiler	no
AECK15CM8	Titan_EG0101_10793HD_Plate6_H08.CEL	AECK-15-C	Farm_AECK-15	15	Cobb400	no	no	no	no	no	no	no	Enclosed	no	Artificial	Manual	Within premises	no	Commercial broiler	no
AECK15CM9	Titan_EG0101_10793HD_Plate6_A09.CEL	AECK-15-C	Farm_AECK-15	15	Cobb400	no	no	no	no	no	no	no	Enclosed	no	Artificial	Manual	Within premises	no	Commercial broiler	no
AECK16CM1	Titan_EG0101_10793HD_Plate6_G06.CEL	AECK-16-K	Farm_AECK-16	16	Kada	no	yes	no	no	yes	yes	yes	Enclosed	yes	Natural	Manual	Outside premises	yes	Kadaknath	yes
AECK16CM10	Titan_EG0101_10793HD_Plate6_H07.CEL	AECK-16-C	Farm_AECK-16	16	Cobb400	no	yes	no	no	yes	yes	yes	Enclosed	yes	Natural	Manual	Outside premises	yes	Commercial broiler	yes
AECK16CM2	Titan_EG0101_10793HD_Plate6_H06.CEL	AECK-16-K	Farm_AECK-16	16	Kada	no	yes	no	no	yes	yes	yes	Enclosed	yes	Natural	Manual	Outside premises	yes	Kadaknath	yes
AECK16CM3	Titan_EG0101_10793HD_Plate6_A07.CEL	AECK-16-K	Farm_AECK-16	16	Kada	no	yes	no	no	yes	yes	yes	Enclosed	yes	Natural	Manual	Outside premises	yes	Kadaknath	yes
AECK16CM4	Titan_EG0101_10793HD_Plate6_B07.CEL	AECK-16-K	Farm_AECK-16	16	Kada	no	yes	no	no	yes	yes	yes	Enclosed	yes	Natural	Manual	Outside premises	yes	Kadaknath	yes
AECK16CM5	Titan_EG0101_10793HD_Plate6_C07.CEL	AECK-16-K	Farm_AECK-16	16	Kada	no	yes	no	no	yes	yes	yes	Enclosed	yes	Natural	Manual	Outside premises	yes	Kadaknath	yes
AECK16CM6	Titan_EG0101_10793HD_Plate6_D07.CEL	AECK-16-C	Farm_AECK-16	16	Cobb400	no	yes	no	no	yes	yes	yes	Enclosed	yes	Natural	Manual	Outside premises	yes	Commercial broiler	yes
AECK16CM7	Titan_EG0101_10793HD_Plate6_E07.CEL	AECK-16-C	Farm_AECK-16	16	Cobb400	no	yes	no	no	yes	yes	yes	Enclosed	yes	Natural	Manual	Outside premises	yes	Commercial broiler	yes
AECK16CM8	Titan_EG0101_10793HD_Plate6_F07.CEL	AECK-16-C	Farm_AECK-16	16	Cobb400	no	yes	no	no	yes	yes	yes	Enclosed	yes	Natural	Manual	Outside premises	yes	Commercial broiler	yes
AECK16CM9	Titan_EG0101_10793HD_Plate6_G07.CEL	AECK-16-C	Farm_AECK-16	16	Cobb400	no	yes	no	no	yes	yes	yes	Enclosed	yes	Natural	Manual	Outside premises	yes	Commercial broiler	yes
AECK17CM1	Titan_EG0102_10793HD_Plate7_E03.CEL	AECK-17-K	Farm_AECK-17	17	Kada	no	yes	no	no	yes	yes	yes	Enclosed	yes	Natural	Manual	Outside premises	yes	Kadaknath	yes
AECK17CM10	Titan_EG0102_10793HD_Plate7_F04.CEL	AECK-17-C	Farm_AECK-17	17	Cobb400	no	yes	no	no	yes	yes	yes	Enclosed	yes	Natural	Manual	Outside premises	yes	Commercial broiler	yes
AECK17CM2	Titan_EG0102_10793HD_Plate7_F03.CEL	AECK-17-K	Farm_AECK-17	17	Kada	no	yes	no	no	yes	yes	yes	Enclosed	yes	Natural	Manual	Outside premises	yes	Kadaknath	yes
AECK17CM3	Titan_EG0102_10793HD_Plate7_G03.CEL	AECK-17-K	Farm_AECK-17	17	Kada	no	yes	no	no	yes	yes	yes	Enclosed	yes	Natural	Manual	Outside premises	yes	Kadaknath	yes
AECK17CM4	Titan_EG0102_10793HD_Plate7_H03.CEL	AECK-17-K	Farm_AECK-17	17	Kada	no	yes	no	no	yes	yes	yes	Enclosed	yes	Natural	Manual	Outside premises	yes	Kadaknath	yes
AECK17CM5	Titan_EG0102_10793HD_Plate7_A04.CEL	AECK-17-K	Farm_AECK-17	17	Kada	no	yes	no	no	yes	yes	yes	Enclosed	yes	Natural	Manual	Outside premises	yes	Kadaknath	yes
AECK17CM6	Titan_EG0102_10793HD_Plate7_B04.CEL	AECK-17-C	Farm_AECK-17	17	Cobb400	no	yes	no	no	yes	yes	yes	Enclosed	yes	Natural	Manual	Outside premises	yes	Commercial broiler	yes
AECK17CM7	Titan_EG0102_10793HD_Plate7_C04.CEL	AECK-17-C	Farm_AECK-17	17	Cobb400	no	yes	no	no	yes	yes	yes	Enclosed	yes	Natural	Manual	Outside premises	yes	Commercial broiler	yes
AECK17CM8	Titan_EG0102_10793HD_Plate7_D04.CEL	AECK-17-C	Farm_AECK-17	17	Cobb400	no	yes	no	no	yes	yes	yes	Enclosed	yes	Natural	Manual	Outside premises	yes	Commercial broiler	yes
AECK17CM9	Titan_EG0102_10793HD_Plate7_E04.CEL	AECK-17-C	Farm_AECK-17	17	Cobb400	no	yes	no	no	yes	yes	yes	Enclosed	yes	Natural	Manual	Outside premises	yes	Commercial broiler	yes
AECK18CM1	Titan_EG0101_10793HD_Plate6_C09.CEL	AECK-18-K	Farm_AECK-18	18	Kada	no	yes	no	no	yes	yes	yes	Caged	yes	Natural	Manual	Outside premises	yes	Kadaknath	yes
AECK18CM10	Titan_EG0101_10793HD_Plate6_D10.CEL	AECK-18-C	Farm_AECK-18	18	Cobb400	no	yes	no	no	yes	yes	yes	Caged	yes	Natural	Manual	Outside premises	yes	Commercial broiler	yes
AECK18CM2	Titan_EG0101_10793HD_Plate6_D09.CEL	AECK-18-K	Farm_AECK-18	18	Kada	no	yes	no	no	yes	yes	yes	Caged	yes	Natural	Manual	Outside premises	yes	Kadaknath	yes
AECK18CM4	Titan_EG0101_10793HD_Plate6_F09.CEL	AECK-18-K	Farm_AECK-18	18	Kada	no	yes	no	no	yes	yes	yes	Caged	yes	Natural	Manual	Outside premises	yes	Kadaknath	yes
AECK18CM5	Titan_EG0101_10793HD_Plate6_G09.CEL	AECK-18-K	Farm_AECK-18	18	Kada	no	yes	no	no	yes	yes	yes	Caged	yes	Natural	Manual	Outside premises	yes	Kadaknath	yes
AECK18CM6	Titan_EG0101_10793HD_Plate6_H09.CEL	AECK-18-C	Farm_AECK-18	18	Cobb400	no	yes	no	no	yes	yes	yes	Caged	yes	Natural	Manual	Outside premises	yes	Commercial broiler	yes
AECK18CM7	Titan_EG0101_10793HD_Plate6_A10.CEL	AECK-18-C	Farm_AECK-18	18	Cobb400	no	yes	no	no	yes	yes	yes	Caged	yes	Natural	Manual	Outside premises	yes	Commercial broiler	yes
AECK18CM8	Titan_EG0101_10793HD_Plate6_B10.CEL	AECK-18-C	Farm_AECK-18	18	Cobb400	no	yes	no	no	yes	yes	yes	Caged	yes	Natural	Manual	Outside premises	yes	Commercial broiler	yes
AECK18CM9	Titan_EG0101_10793HD_Plate6_C10.CEL	AECK-18-C	Farm_AECK-18	18	Cobb400	no	yes	no	no	yes	yes	yes	Caged	yes	Natural	Manual	Outside premises	yes	Commercial broiler	yes
AECK19CM1	Titan_EG0101_10793HD_Plate6_E05.CEL	AECK-19-K	Farm_AECK-19	19	Kada	no	yes	no	no	yes	no	yes	Enclosed	yes	Natural	Manual	Outside premises	yes	Kadaknath	yes
AECK19CM10	Titan_EG0101_10793HD_Plate6_F06.CEL	AECK-19-C	Farm_AECK-19	19	Cobb400	no	yes	no	no	yes	no	yes	Enclosed	yes	Natural	Manual	Outside premises	yes	Commercial broiler	yes
AECK19CM2	Titan_EG0101_10793HD_Plate6_F05.CEL	AECK-19-K	Farm_AECK-19	19	Kada	no	yes	no	no	yes	no	yes	Enclosed	yes	Natural	Manual	Outside premises	yes	Kadaknath	yes
AECK19CM3	Titan_EG0101_10793HD_Plate6_G05.CEL	AECK-19-K	Farm_AECK-19	19	Kada	no	yes	no	no	yes	no	yes	Enclosed	yes	Natural	Manual	Outside premises	yes	Kadaknath	yes
AECK19CM4	Titan_EG0101_10793HD_Plate6_H05.CEL	AECK-19-K	Farm_AECK-19	19	Kada	no	yes	no	no	yes	no	yes	Enclosed	yes	Natural	Manual	Outside premises	yes	Kadaknath	yes
AECK19CM5	Titan_EG0101_10793HD_Plate6_A06.CEL	AECK-19-K	Farm_AECK-19	19	Kada	no	yes	no	no	yes	no	yes	Enclosed	yes	Natural	Manual	Outside premises	yes	Kadaknath	yes
AECK19CM6	Titan_EG0101_10793HD_Plate6_B06.CEL	AECK-19-C	Farm_AECK-19	19	Cobb400	no	yes	no	no	yes	no	yes	Enclosed	yes	Natural	Manual	Outside premises	yes	Commercial broiler	yes
AECK19CM7	Titan_EG0101_10793HD_Plate6_C06.CEL	AECK-19-C	Farm_AECK-19	19	Cobb400	no	yes	no	no	yes	no	yes	Enclosed	yes	Natural	Manual	Outside premises	yes	Commercial broiler	yes
AECK19CM8	Titan_EG0101_10793HD_Plate6_D06.CEL	AECK-19-C	Farm_AECK-19	19	Cobb400	no	yes	no	no	yes	no	yes	Enclosed	yes	Natural	Manual	Outside premises	yes	Commercial broiler	yes
AECK19CM9	Titan_EG0101_10793HD_Plate6_E06.CEL	AECK-19-C	Farm_AECK-19	19	Cobb400	no	yes	no	no	yes	no	yes	Enclosed	yes	Natural	Manual	Outside premises	yes	Commercial broiler	yes
AECK20CM1	Titan_EG0102_10793HD_Plate7_F09.CEL	AECK-20-K	Farm_AECK-20	20	Kada	no	yes	no	no	yes	yes	yes	Enclosed	yes	Natural	Manual	Within premises	yes	Kadaknath	yes
AECK20CM10	Titan_EG0102_10793HD_Plate7_G10.CEL	AECK-20-C	Farm_AECK-20	20	Cobb400	no	yes	no	no	yes	yes	yes	Enclosed	yes	Natural	Manual	Within premises	yes	Commercial broiler	yes
AECK20CM2	Titan_EG0102_10793HD_Plate7_G09.CEL	AECK-20-K	Farm_AECK-20	20	Kada	no	yes	no	no	yes	yes	yes	Enclosed	yes	Natural	Manual	Within premises	yes	Kadaknath	yes
AECK20CM3	Titan_EG0102_10793HD_Plate7_H09.CEL	AECK-20-K	Farm_AECK-20	20	Kada	no	yes	no	no	yes	yes	yes	Enclosed	yes	Natural	Manual	Within premises	yes	Kadaknath	yes
AECK20CM4	Titan_EG0102_10793HD_Plate7_A10.CEL	AECK-20-K	Farm_AECK-20	20	Kada	no	yes	no	no	yes	yes	yes	Enclosed	yes	Natural	Manual	Within premises	yes	Kadaknath	yes
AECK20CM5	Titan_EG0102_10793HD_Plate7_B10.CEL	AECK-20-K	Farm_AECK-20	20	Kada	no	yes	no	no	yes	yes	yes	Enclosed	yes	Natural	Manual	Within premises	yes	Kadaknath	yes
AECK20CM6	Titan_EG0102_10793HD_Plate7_C10.CEL	AECK-20-C	Farm_AECK-20	20	Cobb400	no	yes	no	no	yes	yes	yes	Enclosed	yes	Natural	Manual	Within premises	yes	Commercial broiler	yes
AECK20CM7	Titan_EG0102_10793HD_Plate7_D10.CEL	AECK-20-C	Farm_AECK-20	20	Cobb400	no	yes	no	no	yes	yes	yes	Enclosed	yes	Natural	Manual	Within premises	yes	Commercial broiler	yes
AECK20CM8	Titan_EG0102_10793HD_Plate7_E10.CEL	AECK-20-C	Farm_AECK-20	20	Cobb400	no	yes	no	no	yes	yes	yes	Enclosed	yes	Natural	Manual	Within premises	yes	Commercial broiler	yes
AECK20CM9	Titan_EG0102_10793HD_Plate7_F10.CEL	AECK-20-C	Farm_AECK-20	20	Cobb400	no	yes	no	no	yes	yes	yes	Enclosed	yes	Natural	Manual	Within premises	yes	Commercial broiler	yes
AECK21CM1	Titan_EG0101_10793HD_Plate6_C04.CEL	AECK-21-K	Farm_AECK-21	21	Kada	no	yes	no	no	yes	yes	yes	Enclosed	yes	Natural	Manual	Within premises	yes	Kadaknath	yes
AECK21CM10	Titan_EG0101_10793HD_Plate6_D05.CEL	AECK-21-C	Farm_AECK-21	21	Cobb400	no	yes	no	no	yes	yes	yes	Enclosed	yes	Natural	Manual	Within premises	yes	Commercial broiler	yes
AECK21CM2	Titan_EG0101_10793HD_Plate6_D04.CEL	AECK-21-K	Farm_AECK-21	21	Kada	no	yes	no	no	yes	yes	yes	Enclosed	yes	Natural	Manual	Within premises	yes	Kadaknath	yes
AECK21CM3	Titan_EG0101_10793HD_Plate6_E04.CEL	AECK-21-K	Farm_AECK-21	21	Kada	no	yes	no	no	yes	yes	yes	Enclosed	yes	Natural	Manual	Within premises	yes	Kadaknath	yes
AECK21CM4	Titan_EG0101_10793HD_Plate6_F04.CEL	AECK-21-K	Farm_AECK-21	21	Kada	no	yes	no	no	yes	yes	yes	Enclosed	yes	Natural	Manual	Within premises	yes	Kadaknath	yes
AECK21CM5	Titan_EG0101_10793HD_Plate6_G04.CEL	AECK-21-K	Farm_AECK-21	21	Kada	no	yes	no	no	yes	yes	yes	Enclosed	yes	Natural	Manual	Within premises	yes	Kadaknath	yes
AECK21CM6	Titan_EG0101_10793HD_Plate6_H04.CEL	AECK-21-C	Farm_AECK-21	21	Cobb400	no	yes	no	no	yes	yes	yes	Enclosed	yes	Natural	Manual	Within premises	yes	Commercial broiler	yes
AECK21CM7	Titan_EG0101_10793HD_Plate6_A05.CEL	AECK-21-C	Farm_AECK-21	21	Cobb400	no	yes	no	no	yes	yes	yes	Enclosed	yes	Natural	Manual	Within premises	yes	Commercial broiler	yes
AECK21CM8	Titan_EG0101_10793HD_Plate6_B05.CEL	AECK-21-C	Farm_AECK-21	21	Cobb400	no	yes	no	no	yes	yes	yes	Enclosed	yes	Natural	Manual	Within premises	yes	Commercial broiler	yes
AECK21CM9	Titan_EG0101_10793HD_Plate6_C05.CEL	AECK-21-C	Farm_AECK-21	21	Cobb400	no	yes	no	no	yes	yes	yes	Enclosed	yes	Natural	Manual	Within premises	yes	Commercial broiler	yes
AECK22CM1	Titan_EG0102_10793HD_Plate7_A06.CEL	AECK-22-K	Farm_AECK-22	22	Kada	no	yes	no	no	no	no	yes	open	no	Natural	Manual	Within premises	no	Kadaknath	yes
AECK22CM10	Titan_EG0102_10793HD_Plate7_B07.CEL	AECK-22-C	Farm_AECK-22	22	Cobb400	no	yes	no	no	no	no	yes	open	no	Natural	Manual	Within premises	no	Commercial broiler	yes
AECK22CM2	Titan_EG0102_10793HD_Plate7_B06.CEL	AECK-22-K	Farm_AECK-22	22	Kada	no	yes	no	no	no	no	yes	open	no	Natural	Manual	Within premises	no	Kadaknath	yes
AECK22CM3	Titan_EG0102_10793HD_Plate7_C06.CEL	AECK-22-K	Farm_AECK-22	22	Kada	no	yes	no	no	no	no	yes	open	no	Natural	Manual	Within premises	no	Kadaknath	yes
AECK22CM4	Titan_EG0102_10793HD_Plate7_D06.CEL	AECK-22-K	Farm_AECK-22	22	Kada	no	yes	no	no	no	no	yes	open	no	Natural	Manual	Within premises	no	Kadaknath	yes
AECK22CM5	Titan_EG0102_10793HD_Plate7_E06.CEL	AECK-22-K	Farm_AECK-22	22	Kada	no	yes	no	no	no	no	yes	open	no	Natural	Manual	Within premises	no	Kadaknath	yes
AECK22CM6	Titan_EG0102_10793HD_Plate7_F06.CEL	AECK-22-C	Farm_AECK-22	22	Cobb400	no	yes	no	no	no	no	yes	open	no	Natural	Manual	Within premises	no	Commercial broiler	yes
AECK22CM7	Titan_EG0102_10793HD_Plate7_G06.CEL	AECK-22-C	Farm_AECK-22	22	Cobb400	no	yes	no	no	no	no	yes	open	no	Natural	Manual	Within premises	no	Commercial broiler	yes
AECK22CM8	Titan_EG0102_10793HD_Plate7_H06.CEL	AECK-22-C	Farm_AECK-22	22	Cobb400	no	yes	no	no	no	no	yes	open	no	Natural	Manual	Within premises	no	Commercial broiler	yes
AECK22CM9	Titan_EG0102_10793HD_Plate7_A07.CEL	AECK-22-C	Farm_AECK-22	22	Cobb400	no	yes	no	no	no	no	yes	open	no	Natural	Manual	Within premises	no	Commercial broiler	yes
AECK23CM1	Titan_EG0102_10793HD_Plate7_B12.CEL	AECK-23-K	Farm_AECK-23	23	Kada	no	yes	yes	yes	yes	no	yes	Caged	no	Natural	Manual	Outside premises	yes	Kadaknath	yes
AECK23CM10	Titan_EG0103_10793HD_Plate8_C01.CEL	AECK-23-C	Farm_AECK-23	23	Cobb400	no	yes	yes	yes	yes	no	yes	Caged	no	Natural	Manual	Outside premises	yes	Commercial broiler	yes
AECK23CM2	Titan_EG0102_10793HD_Plate7_C12.CEL	AECK-23-K	Farm_AECK-23	23	Kada	no	yes	yes	yes	yes	no	yes	Caged	no	Natural	Manual	Outside premises	yes	Kadaknath	yes
AECK23CM3	Titan_EG0102_10793HD_Plate7_D12.CEL	AECK-23-K	Farm_AECK-23	23	Kada	no	yes	yes	yes	yes	no	yes	Caged	no	Natural	Manual	Outside premises	yes	Kadaknath	yes
AECK23CM4	Titan_EG0102_10793HD_Plate7_E12.CEL	AECK-23-K	Farm_AECK-23	23	Kada	no	yes	yes	yes	yes	no	yes	Caged	no	Natural	Manual	Outside premises	yes	Kadaknath	yes
AECK23CM5	Titan_EG0102_10793HD_Plate7_F12.CEL	AECK-23-K	Farm_AECK-23	23	Kada	no	yes	yes	yes	yes	no	yes	Caged	no	Natural	Manual	Outside premises	yes	Kadaknath	yes
AECK23CM6	Titan_EG0102_10793HD_Plate7_G12.CEL	AECK-23-C	Farm_AECK-23	23	Cobb400	no	yes	yes	yes	yes	no	yes	Caged	no	Natural	Manual	Outside premises	yes	Commercial broiler	yes
AECK23CM7	Titan_EG0100_10793HD_Plate5_F12.CEL	AECK-23-C	Farm_AECK-23	23	Cobb400	no	yes	yes	yes	yes	no	yes	Caged	no	Natural	Manual	Outside premises	yes	Commercial broiler	yes
AECK23CM8	Titan_EG0103_10793HD_Plate8_A01.CEL	AECK-23-C	Farm_AECK-23	23	Cobb400	no	yes	yes	yes	yes	no	yes	Caged	no	Natural	Manual	Outside premises	yes	Commercial broiler	yes
AECK23CM9	Titan_EG0103_10793HD_Plate8_B01.CEL	AECK-23-C	Farm_AECK-23	23	Cobb400	no	yes	yes	yes	yes	no	yes	Caged	no	Natural	Manual	Outside premises	yes	Commercial broiler	yes
AECK24CM1	Titan_EG0101_10793HD_Plate6_E10.CEL	AECK-24-K	Farm_AECK-24	24	Kada	no	yes	no	no	no	no	no	Enclosed	no	Natural	Manual	Within premises	yes	Kadaknath	yes
AECK24CM10	Titan_EG0101_10793HD_Plate6_F11.CEL	AECK-24-C	Farm_AECK-24	24	Cobb400	no	yes	no	no	no	no	no	Enclosed	no	Natural	Manual	Within premises	yes	Commercial broiler	yes
AECK24CM2	Titan_EG0101_10793HD_Plate6_F10.CEL	AECK-24-K	Farm_AECK-24	24	Kada	no	yes	no	no	no	no	no	Enclosed	no	Natural	Manual	Within premises	yes	Kadaknath	yes
AECK24CM3	Titan_EG0101_10793HD_Plate6_G10.CEL	AECK-24-K	Farm_AECK-24	24	Kada	no	yes	no	no	no	no	no	Enclosed	no	Natural	Manual	Within premises	yes	Kadaknath	yes
AECK24CM4	Titan_EG0101_10793HD_Plate6_H10.CEL	AECK-24-K	Farm_AECK-24	24	Kada	no	yes	no	no	no	no	no	Enclosed	no	Natural	Manual	Within premises	yes	Kadaknath	yes
AECK24CM5	Titan_EG0101_10793HD_Plate6_A11.CEL	AECK-24-K	Farm_AECK-24	24	Kada	no	yes	no	no	no	no	no	Enclosed	no	Natural	Manual	Within premises	yes	Kadaknath	yes
AECK24CM6	Titan_EG0101_10793HD_Plate6_B11.CEL	AECK-24-C	Farm_AECK-24	24	Cobb400	no	yes	no	no	no	no	no	Enclosed	no	Natural	Manual	Within premises	yes	Commercial broiler	yes
AECK24CM7	Titan_EG0101_10793HD_Plate6_C11.CEL	AECK-24-C	Farm_AECK-24	24	Cobb400	no	yes	no	no	no	no	no	Enclosed	no	Natural	Manual	Within premises	yes	Commercial broiler	yes
AECK24CM8	Titan_EG0101_10793HD_Plate6_D11.CEL	AECK-24-C	Farm_AECK-24	24	Cobb400	no	yes	no	no	no	no	no	Enclosed	no	Natural	Manual	Within premises	yes	Commercial broiler	yes
AECK25CM1	Titan_EG0102_10793HD_Plate7_C02.CEL	AECK-25-K	Farm_AECK-25	25	Kada	no	yes	no	no	yes	no	yes	Caged	no	Natural	Manual	Within premises	yes	Kadaknath	yes
AECK25CM10	Titan_EG0102_10793HD_Plate7_D03.CEL	AECK-25-C	Farm_AECK-25	25	Cobb400	no	yes	no	no	yes	no	yes	Caged	no	Natural	Manual	Within premises	yes	Commercial broiler	yes
AECK25CM2	Titan_EG0102_10793HD_Plate7_D02.CEL	AECK-25-K	Farm_AECK-25	25	Kada	no	yes	no	no	yes	no	yes	Caged	no	Natural	Manual	Within premises	yes	Kadaknath	yes
AECK25CM3	Titan_EG0102_10793HD_Plate7_E02.CEL	AECK-25-K	Farm_AECK-25	25	Kada	no	yes	no	no	yes	no	yes	Caged	no	Natural	Manual	Within premises	yes	Kadaknath	yes
AECK25CM4	Titan_EG0102_10793HD_Plate7_F02.CEL	AECK-25-K	Farm_AECK-25	25	Kada	no	yes	no	no	yes	no	yes	Caged	no	Natural	Manual	Within premises	yes	Kadaknath	yes
AECK25CM5	Titan_EG0102_10793HD_Plate7_G02.CEL	AECK-25-K	Farm_AECK-25	25	Kada	no	yes	no	no	yes	no	yes	Caged	no	Natural	Manual	Within premises	yes	Kadaknath	yes
AECK25CM6	Titan_EG0102_10793HD_Plate7_H02.CEL	AECK-25-C	Farm_AECK-25	25	Cobb400	no	yes	no	no	yes	no	yes	Caged	no	Natural	Manual	Within premises	yes	Commercial broiler	yes
AECK25CM7	Titan_EG0102_10793HD_Plate7_A03.CEL	AECK-25-C	Farm_AECK-25	25	Cobb400	no	yes	no	no	yes	no	yes	Caged	no	Natural	Manual	Within premises	yes	Commercial broiler	yes
AECK25CM8	Titan_EG0102_10793HD_Plate7_B03.CEL	AECK-25-C	Farm_AECK-25	25	Cobb400	no	yes	no	no	yes	no	yes	Caged	no	Natural	Manual	Within premises	yes	Commercial broiler	yes
AECK25CM9	Titan_EG0102_10793HD_Plate7_C03.CEL	AECK-25-C	Farm_AECK-25	25	Cobb400	no	yes	no	no	yes	no	yes	Caged	no	Natural	Manual	Within premises	yes	Commercial broiler	yes
AECK26CM1	Titan_EG0102_10793HD_Plate7_D08.CEL	AECK-26-K	Farm_AECK-26	26	Kada	no	yes	no	no	no	no	no	open	no	Natural	Manual	Within premises	no	Kadaknath	no
AECK26CM10	Titan_EG0102_10793HD_Plate7_E09.CEL	AECK-26-C	Farm_AECK-26	26	Cobb400	no	yes	no	no	no	no	no	open	no	Natural	Manual	Within premises	no	Commercial broiler	no
AECK26CM2	Titan_EG0102_10793HD_Plate7_E08.CEL	AECK-26-K	Farm_AECK-26	26	Kada	no	yes	no	no	no	no	no	open	no	Natural	Manual	Within premises	no	Kadaknath	no
AECK26CM3	Titan_EG0102_10793HD_Plate7_F08.CEL	AECK-26-K	Farm_AECK-26	26	Kada	no	yes	no	no	no	no	no	open	no	Natural	Manual	Within premises	no	Kadaknath	no
AECK26CM4	Titan_EG0102_10793HD_Plate7_G08.CEL	AECK-26-K	Farm_AECK-26	26	Kada	no	yes	no	no	no	no	no	open	no	Natural	Manual	Within premises	no	Kadaknath	no
AECK26CM6	Titan_EG0102_10793HD_Plate7_A09.CEL	AECK-26-C	Farm_AECK-26	26	Cobb400	no	yes	no	no	no	no	no	open	no	Natural	Manual	Within premises	no	Commercial broiler	no
AECK26CM7	Titan_EG0102_10793HD_Plate7_B09.CEL	AECK-26-C	Farm_AECK-26	26	Cobb400	no	yes	no	no	no	no	no	open	no	Natural	Manual	Within premises	no	Commercial broiler	no
AECK26CM8	Titan_EG0102_10793HD_Plate7_C09.CEL	AECK-26-C	Farm_AECK-26	26	Cobb400	no	yes	no	no	no	no	no	open	no	Natural	Manual	Within premises	no	Commercial broiler	no
AECK26CM9	Titan_EG0102_10793HD_Plate7_D09.CEL	AECK-26-C	Farm_AECK-26	26	Cobb400	no	yes	no	no	no	no	no	open	no	Natural	Manual	Within premises	no	Commercial broiler	no
AECK27CM1	Titan_EG0102_10793HD_Plate7_C07.CEL	AECK-27-K	Farm_AECK-27	27	Kada	yes	no	no	no	yes	no	yes	open	no	Artificial	Manual	Outside premises	no	Kadaknath	no
AECK27CM10	Titan_EG0102_10793HD_Plate7_C08.CEL	AECK-27-C	Farm_AECK-27	27	Cobb400	yes	no	no	no	yes	no	yes	open	no	Artificial	Manual	Outside premises	no	Commercial broiler	no
AECK27CM4	Titan_EG0102_10793HD_Plate7_E07.CEL	AECK-27-K	Farm_AECK-27	27	Kada	yes	no	no	no	yes	no	yes	open	no	Artificial	Manual	Outside premises	no	Kadaknath	no
AECK27CM5	Titan_EG0102_10793HD_Plate7_F07.CEL	AECK-27-K	Farm_AECK-27	27	Kada	yes	no	no	no	yes	no	yes	open	no	Artificial	Manual	Outside premises	no	Kadaknath	no
AECK27CM6	Titan_EG0102_10793HD_Plate7_G07.CEL	AECK-27-C	Farm_AECK-27	27	Cobb400	yes	no	no	no	yes	no	yes	open	no	Artificial	Manual	Outside premises	no	Commercial broiler	no
AECK27CM7	Titan_EG0102_10793HD_Plate7_H07.CEL	AECK-27-C	Farm_AECK-27	27	Cobb400	yes	no	no	no	yes	no	yes	open	no	Artificial	Manual	Outside premises	no	Commercial broiler	no
AECK27CM8	Titan_EG0102_10793HD_Plate7_A08.CEL	AECK-27-C	Farm_AECK-27	27	Cobb400	yes	no	no	no	yes	no	yes	open	no	Artificial	Manual	Outside premises	no	Commercial broiler	no
AECK27CM9	Titan_EG0102_10793HD_Plate7_B08.CEL	AECK-27-C	Farm_AECK-27	27	Cobb400	yes	no	no	no	yes	no	yes	open	no	Artificial	Manual	Outside premises	no	Commercial broiler	no
AECK28CM1	Titan_EG0101_10793HD_Plate6_A03.CEL	AECK-28-K	Farm_AECK-28	28	Kada	no	yes	no	no	yes	no	yes	Enclosed	no	Natural	Manual	Within premises	yes	Kadaknath	no
AECK28CM10	Titan_EG0101_10793HD_Plate6_B04.CEL	AECK-28-C	Farm_AECK-28	28	Cobb400	no	yes	no	no	yes	no	yes	Enclosed	no	Natural	Manual	Within premises	yes	Commercial broiler	no
AECK28CM2	Titan_EG0101_10793HD_Plate6_B03.CEL	AECK-28-K	Farm_AECK-28	28	Kada	no	yes	no	no	yes	no	yes	Enclosed	no	Natural	Manual	Within premises	yes	Kadaknath	no
AECK28CM3	Titan_EG0101_10793HD_Plate6_C03.CEL	AECK-28-K	Farm_AECK-28	28	Kada	no	yes	no	no	yes	no	yes	Enclosed	no	Natural	Manual	Within premises	yes	Kadaknath	no
AECK28CM4	Titan_EG0101_10793HD_Plate6_D03.CEL	AECK-28-K	Farm_AECK-28	28	Kada	no	yes	no	no	yes	no	yes	Enclosed	no	Natural	Manual	Within premises	yes	Kadaknath	no
AECK28CM5	Titan_EG0101_10793HD_Plate6_E03.CEL	AECK-28-K	Farm_AECK-28	28	Kada	no	yes	no	no	yes	no	yes	Enclosed	no	Natural	Manual	Within premises	yes	Kadaknath	no
AECK28CM6	Titan_EG0101_10793HD_Plate6_F03.CEL	AECK-28-C	Farm_AECK-28	28	Cobb400	no	yes	no	no	yes	no	yes	Enclosed	no	Natural	Manual	Within premises	yes	Commercial broiler	no
AECK28CM7	Titan_EG0101_10793HD_Plate6_G03.CEL	AECK-28-C	Farm_AECK-28	28	Cobb400	no	yes	no	no	yes	no	yes	Enclosed	no	Natural	Manual	Within premises	yes	Commercial broiler	no
AECK28CM8	Titan_EG0101_10793HD_Plate6_H03.CEL	AECK-28-C	Farm_AECK-28	28	Cobb400	no	yes	no	no	yes	no	yes	Enclosed	no	Natural	Manual	Within premises	yes	Commercial broiler	no
AECK28CM9	Titan_EG0101_10793HD_Plate6_A04.CEL	AECK-28-C	Farm_AECK-28	28	Cobb400	no	yes	no	no	yes	no	yes	Enclosed	no	Natural	Manual	Within premises	yes	Commercial broiler	no
AECK29CM1	Titan_EG0102_10793HD_Plate7_H10.CEL	AECK-29-K	Farm_AECK-29	29	Kada	no	yes	yes	no	no	no	no	Caged	no	Natural	Manual	Outside premises	no	Kadaknath	no
AECK29CM10	Titan_EG0102_10793HD_Plate7_A12.CEL	AECK-29-C	Farm_AECK-29	29	Cobb400	no	yes	yes	no	no	no	no	Caged	no	Natural	Manual	Outside premises	no	Commercial broiler	no
AECK29CM2	Titan_EG0102_10793HD_Plate7_A11.CEL	AECK-29-K	Farm_AECK-29	29	Kada	no	yes	yes	no	no	no	no	Caged	no	Natural	Manual	Outside premises	no	Kadaknath	no
AECK29CM3	Titan_EG0102_10793HD_Plate7_B11.CEL	AECK-29-K	Farm_AECK-29	29	Kada	no	yes	yes	no	no	no	no	Caged	no	Natural	Manual	Outside premises	no	Kadaknath	no
AECK29CM4	Titan_EG0102_10793HD_Plate7_C11.CEL	AECK-29-K	Farm_AECK-29	29	Kada	no	yes	yes	no	no	no	no	Caged	no	Natural	Manual	Outside premises	no	Kadaknath	no
AECK29CM5	Titan_EG0102_10793HD_Plate7_D11.CEL	AECK-29-K	Farm_AECK-29	29	Kada	no	yes	yes	no	no	no	no	Caged	no	Natural	Manual	Outside premises	no	Kadaknath	no
AECK29CM6	Titan_EG0102_10793HD_Plate7_E11.CEL	AECK-29-C	Farm_AECK-29	29	Cobb400	no	yes	yes	no	no	no	no	Caged	no	Natural	Manual	Outside premises	no	Commercial broiler	no
AECK29CM7	Titan_EG0102_10793HD_Plate7_F11.CEL	AECK-29-C	Farm_AECK-29	29	Cobb400	no	yes	yes	no	no	no	no	Caged	no	Natural	Manual	Outside premises	no	Commercial broiler	no
AECK29CM8	Titan_EG0102_10793HD_Plate7_G11.CEL	AECK-29-C	Farm_AECK-29	29	Cobb400	no	yes	yes	no	no	no	no	Caged	no	Natural	Manual	Outside premises	no	Commercial broiler	no
AECK29CM9	Titan_EG0102_10793HD_Plate7_H11.CEL	AECK-29-C	Farm_AECK-29	29	Cobb400	no	yes	yes	no	no	no	no	Caged	no	Natural	Manual	Outside premises	no	Commercial broiler	no
AECK30CM1	Titan_EG0102_10793HD_Plate7_G04.CEL	AECK-30-K	Farm_AECK-30	30	Kada	no	yes	no	yes	yes	no	yes	Caged	no	Natural	Manual	Outside premises	yes	Kadaknath	yes
AECK30CM10	Titan_EG0102_10793HD_Plate7_H05.CEL	AECK-30-C	Farm_AECK-30	30	Cobb400	no	yes	no	yes	yes	no	yes	Caged	no	Natural	Manual	Outside premises	yes	Commercial broiler	yes
AECK30CM2	Titan_EG0102_10793HD_Plate7_H04.CEL	AECK-30-K	Farm_AECK-30	30	Kada	no	yes	no	yes	yes	no	yes	Caged	no	Natural	Manual	Outside premises	yes	Kadaknath	yes
AECK30CM3	Titan_EG0102_10793HD_Plate7_A05.CEL	AECK-30-K	Farm_AECK-30	30	Kada	no	yes	no	yes	yes	no	yes	Caged	no	Natural	Manual	Outside premises	yes	Kadaknath	yes
AECK30CM4	Titan_EG0102_10793HD_Plate7_B05.CEL	AECK-30-K	Farm_AECK-30	30	Kada	no	yes	no	yes	yes	no	yes	Caged	no	Natural	Manual	Outside premises	yes	Kadaknath	yes
AECK30CM5	Titan_EG0102_10793HD_Plate7_C05.CEL	AECK-30-K	Farm_AECK-30	30	Kada	no	yes	no	yes	yes	no	yes	Caged	no	Natural	Manual	Outside premises	yes	Kadaknath	yes
AECK30CM6	Titan_EG0102_10793HD_Plate7_D05.CEL	AECK-30-C	Farm_AECK-30	30	Cobb400	no	yes	no	yes	yes	no	yes	Caged	no	Natural	Manual	Outside premises	yes	Commercial broiler	yes
AECK30CM7	Titan_EG0102_10793HD_Plate7_E05.CEL	AECK-30-C	Farm_AECK-30	30	Cobb400	no	yes	no	yes	yes	no	yes	Caged	no	Natural	Manual	Outside premises	yes	Commercial broiler	yes
AECK30CM8	Titan_EG0102_10793HD_Plate7_F05.CEL	AECK-30-C	Farm_AECK-30	30	Cobb400	no	yes	no	yes	yes	no	yes	Caged	no	Natural	Manual	Outside premises	yes	Commercial broiler	yes
AECK30CM9	Titan_EG0102_10793HD_Plate7_G05.CEL	AECK-30-C	Farm_AECK-30	30	Cobb400	no	yes	no	yes	yes	no	yes	Caged	no	Natural	Manual	Outside premises	yes	Commercial broiler	yes
AEK01CM10	Titan_EG0096_10793HD_Plate1_A02.CEL	AEK-01	Farm_AEK-01	1	Kada	no	no	no	no	no	yes	yes	Enclosed	yes	Natural	Manual	Within premises	yes	Kadaknath	no
AEK01CM2	Titan_EG0096_10793HD_Plate1_A01.CEL	AEK-01	Farm_AEK-01	1	Kada	no	no	no	no	no	yes	yes	Enclosed	yes	Natural	Manual	Within premises	yes	Kadaknath	no
AEK01CM4	Titan_EG0096_10793HD_Plate1_C01.CEL	AEK-01	Farm_AEK-01	1	Kada	no	no	no	no	no	yes	yes	Enclosed	yes	Natural	Manual	Within premises	yes	Kadaknath	no
AEK01CM5	Titan_EG0096_10793HD_Plate1_D01.CEL	AEK-01	Farm_AEK-01	1	Kada	no	no	no	no	no	yes	yes	Enclosed	yes	Natural	Manual	Within premises	yes	Kadaknath	no
AEK01CM6	Titan_EG0096_10793HD_Plate1_H10.CEL	AEK-01	Farm_AEK-01	1	Kada	no	no	no	no	no	yes	yes	Enclosed	yes	Natural	Manual	Within premises	yes	Kadaknath	no
AEK01CM7	Titan_EG0096_10793HD_Plate1_F01.CEL	AEK-01	Farm_AEK-01	1	Kada	no	no	no	no	no	yes	yes	Enclosed	yes	Natural	Manual	Within premises	yes	Kadaknath	no
AEK01CM8	Titan_EG0096_10793HD_Plate1_G01.CEL	AEK-01	Farm_AEK-01	1	Kada	no	no	no	no	no	yes	yes	Enclosed	yes	Natural	Manual	Within premises	yes	Kadaknath	no
AEK01CM9	Titan_EG0096_10793HD_Plate1_H01.CEL	AEK-01	Farm_AEK-01	1	Kada	no	no	no	no	no	yes	yes	Enclosed	yes	Natural	Manual	Within premises	yes	Kadaknath	no
AEK02CM1	Titan_EG0096_10793HD_Plate1_B02.CEL	AEK-02	Farm_AEK-02	2	Kada	no	no	no	no	yes	yes	yes	open	no	Natural	Manual	Within premises	no	Kadaknath	no
AEK02CM2	Titan_EG0096_10793HD_Plate1_C02.CEL	AEK-02	Farm_AEK-02	2	Kada	no	no	no	no	yes	yes	yes	open	no	Natural	Manual	Within premises	no	Kadaknath	no
AEK02CM3	Titan_EG0096_10793HD_Plate1_D02.CEL	AEK-02	Farm_AEK-02	2	Kada	no	no	no	no	yes	yes	yes	open	no	Natural	Manual	Within premises	no	Kadaknath	no
AEK02CM4	Titan_EG0096_10793HD_Plate1_E02.CEL	AEK-02	Farm_AEK-02	2	Kada	no	no	no	no	yes	yes	yes	open	no	Natural	Manual	Within premises	no	Kadaknath	no
AEK02CM5	Titan_EG0096_10793HD_Plate1_F02.CEL	AEK-02	Farm_AEK-02	2	Kada	no	no	no	no	yes	yes	yes	open	no	Natural	Manual	Within premises	no	Kadaknath	no
AEK02CM6	Titan_EG0096_10793HD_Plate1_G02.CEL	AEK-02	Farm_AEK-02	2	Kada	no	no	no	no	yes	yes	yes	open	no	Natural	Manual	Within premises	no	Kadaknath	no
AEK02CM7	Titan_EG0096_10793HD_Plate1_H02.CEL	AEK-02	Farm_AEK-02	2	Kada	no	no	no	no	yes	yes	yes	open	no	Natural	Manual	Within premises	no	Kadaknath	no
AEK03CM10	Titan_EG0096_10793HD_Plate1_E04.CEL	AEK-03	Farm_AEK-03	3	Kada	no	no	no	no	yes	no	yes	open	no	Natural	Manual	Outside premises	yes	Kadaknath	no
AEK03CM2	Titan_EG0096_10793HD_Plate1_E03.CEL	AEK-03	Farm_AEK-03	3	Kada	no	no	no	no	yes	no	yes	open	no	Natural	Manual	Outside premises	yes	Kadaknath	no
AEK03CM4	Titan_EG0096_10793HD_Plate1_G03.CEL	AEK-03	Farm_AEK-03	3	Kada	no	no	no	no	yes	no	yes	open	no	Natural	Manual	Outside premises	yes	Kadaknath	no
AEK03CM6	Titan_EG0096_10793HD_Plate1_A04.CEL	AEK-03	Farm_AEK-03	3	Kada	no	no	no	no	yes	no	yes	open	no	Natural	Manual	Outside premises	yes	Kadaknath	no
AEK03CM9	Titan_EG0096_10793HD_Plate1_D04.CEL	AEK-03	Farm_AEK-03	3	Kada	no	no	no	no	yes	no	yes	open	no	Natural	Manual	Outside premises	yes	Kadaknath	no
AEK04CM1	Titan_EG0096_10793HD_Plate1_F04.CEL	AEK-04	Farm_AEK-04	4	Kada	yes	no	yes	yes	yes	no	yes	open	no	Natural	Automatic	Within premises	yes	Kadaknath	no
AEK04CM10	Titan_EG0096_10793HD_Plate1_G05.CEL	AEK-04	Farm_AEK-04	4	Kada	yes	no	yes	yes	yes	no	yes	open	no	Natural	Automatic	Within premises	yes	Kadaknath	no
AEK04CM2	Titan_EG0096_10793HD_Plate1_G04.CEL	AEK-04	Farm_AEK-04	4	Kada	yes	no	yes	yes	yes	no	yes	open	no	Natural	Automatic	Within premises	yes	Kadaknath	no
AEK04CM3	Titan_EG0096_10793HD_Plate1_H04.CEL	AEK-04	Farm_AEK-04	4	Kada	yes	no	yes	yes	yes	no	yes	open	no	Natural	Automatic	Within premises	yes	Kadaknath	no
AEK04CM4	Titan_EG0096_10793HD_Plate1_A05.CEL	AEK-04	Farm_AEK-04	4	Kada	yes	no	yes	yes	yes	no	yes	open	no	Natural	Automatic	Within premises	yes	Kadaknath	no
AEK04CM6	Titan_EG0096_10793HD_Plate1_C05.CEL	AEK-04	Farm_AEK-04	4	Kada	yes	no	yes	yes	yes	no	yes	open	no	Natural	Automatic	Within premises	yes	Kadaknath	no
AEK04CM7	Titan_EG0096_10793HD_Plate1_D05.CEL	AEK-04	Farm_AEK-04	4	Kada	yes	no	yes	yes	yes	no	yes	open	no	Natural	Automatic	Within premises	yes	Kadaknath	no
AEK04CM9	Titan_EG0096_10793HD_Plate1_F05.CEL	AEK-04	Farm_AEK-04	4	Kada	yes	no	yes	yes	yes	no	yes	open	no	Natural	Automatic	Within premises	yes	Kadaknath	no
AEK05CM10	Titan_EG0096_10793HD_Plate1_A07.CEL	AEK-05	Farm_AEK-05	5	Kada	yes	no	yes	yes	yes	no	yes	open	no	Natural	Automatic	Within premises	yes	Kadaknath	no
AEK05CM2	Titan_EG0096_10793HD_Plate1_A06.CEL	AEK-05	Farm_AEK-05	5	Kada	yes	no	yes	yes	yes	no	yes	open	no	Natural	Automatic	Within premises	yes	Kadaknath	no
AEK05CM3	Titan_EG0096_10793HD_Plate1_B06.CEL	AEK-05	Farm_AEK-05	5	Kada	yes	no	yes	yes	yes	no	yes	open	no	Natural	Automatic	Within premises	yes	Kadaknath	no
AEK05CM4	Titan_EG0096_10793HD_Plate1_C06.CEL	AEK-05	Farm_AEK-05	5	Kada	yes	no	yes	yes	yes	no	yes	open	no	Natural	Automatic	Within premises	yes	Kadaknath	no
AEK05CM5	Titan_EG0096_10793HD_Plate1_D06.CEL	AEK-05	Farm_AEK-05	5	Kada	yes	no	yes	yes	yes	no	yes	open	no	Natural	Automatic	Within premises	yes	Kadaknath	no
AEK05CM6	Titan_EG0096_10793HD_Plate1_E06.CEL	AEK-05	Farm_AEK-05	5	Kada	yes	no	yes	yes	yes	no	yes	open	no	Natural	Automatic	Within premises	yes	Kadaknath	no
AEK05CM7	Titan_EG0096_10793HD_Plate1_F06.CEL	AEK-05	Farm_AEK-05	5	Kada	yes	no	yes	yes	yes	no	yes	open	no	Natural	Automatic	Within premises	yes	Kadaknath	no
AEK05CM8	Titan_EG0096_10793HD_Plate1_G06.CEL	AEK-05	Farm_AEK-05	5	Kada	yes	no	yes	yes	yes	no	yes	open	no	Natural	Automatic	Within premises	yes	Kadaknath	no
AEK05CM9	Titan_EG0096_10793HD_Plate1_H06.CEL	AEK-05	Farm_AEK-05	5	Kada	yes	no	yes	yes	yes	no	yes	open	no	Natural	Automatic	Within premises	yes	Kadaknath	no
AEK06CM3	Titan_EG0096_10793HD_Plate1_D07.CEL	AEK-06	Farm_AEK-06	6	Kada	no	yes	no	no	yes	yes	yes	Enclosed	yes	Natural	Manual	Within premises	yes	Kadaknath	yes
AEK06CM7	Titan_EG0096_10793HD_Plate1_H07.CEL	AEK-06	Farm_AEK-06	6	Kada	no	yes	no	no	yes	yes	yes	Enclosed	yes	Natural	Manual	Within premises	yes	Kadaknath	yes
AEK06CM8	Titan_EG0096_10793HD_Plate1_A08.CEL	AEK-06	Farm_AEK-06	6	Kada	no	yes	no	no	yes	yes	yes	Enclosed	yes	Natural	Manual	Within premises	yes	Kadaknath	yes
AEK07CM1	Titan_EG0096_10793HD_Plate1_D08.CEL	AEK-07	Farm_AEK-07	7	Kada	no	yes	no	no	yes	yes	yes	Enclosed	yes	Natural	Manual	Within premises	yes	Kadaknath	yes
AEK07CM10	Titan_EG0096_10793HD_Plate1_E09.CEL	AEK-07	Farm_AEK-07	7	Kada	no	yes	no	no	yes	yes	yes	Enclosed	yes	Natural	Manual	Within premises	yes	Kadaknath	yes
AEK07CM3	Titan_EG0096_10793HD_Plate1_F08.CEL	AEK-07	Farm_AEK-07	7	Kada	no	yes	no	no	yes	yes	yes	Enclosed	yes	Natural	Manual	Within premises	yes	Kadaknath	yes
AEK07CM4	Titan_EG0096_10793HD_Plate1_G08.CEL	AEK-07	Farm_AEK-07	7	Kada	no	yes	no	no	yes	yes	yes	Enclosed	yes	Natural	Manual	Within premises	yes	Kadaknath	yes
AEK07CM5	Titan_EG0096_10793HD_Plate1_H08.CEL	AEK-07	Farm_AEK-07	7	Kada	no	yes	no	no	yes	yes	yes	Enclosed	yes	Natural	Manual	Within premises	yes	Kadaknath	yes
AEK07CM6	Titan_EG0096_10793HD_Plate1_A09.CEL	AEK-07	Farm_AEK-07	7	Kada	no	yes	no	no	yes	yes	yes	Enclosed	yes	Natural	Manual	Within premises	yes	Kadaknath	yes
AEK07CM7	Titan_EG0096_10793HD_Plate1_B09.CEL	AEK-07	Farm_AEK-07	7	Kada	no	yes	no	no	yes	yes	yes	Enclosed	yes	Natural	Manual	Within premises	yes	Kadaknath	yes
AEK07CM9	Titan_EG0096_10793HD_Plate1_D09.CEL	AEK-07	Farm_AEK-07	7	Kada	no	yes	no	no	yes	yes	yes	Enclosed	yes	Natural	Manual	Within premises	yes	Kadaknath	yes
AEK08CM10	Titan_EG0100_10793HD_Plate5_G12.CEL	AEK-08	Farm_AEK-08	8	Kada	no	yes	no	no	yes	yes	yes	Enclosed	yes	Natural	Manual	Outside premises	yes	Kadaknath	no
AEK08CM4	Titan_EG0096_10793HD_Plate1_A10.CEL	AEK-08	Farm_AEK-08	8	Kada	no	yes	no	no	yes	yes	yes	Enclosed	yes	Natural	Manual	Outside premises	yes	Kadaknath	no
AEK08CM5	Titan_EG0096_10793HD_Plate1_B10.CEL	AEK-08	Farm_AEK-08	8	Kada	no	yes	no	no	yes	yes	yes	Enclosed	yes	Natural	Manual	Outside premises	yes	Kadaknath	no
AEK08CM6	Titan_EG0096_10793HD_Plate1_C10.CEL	AEK-08	Farm_AEK-08	8	Kada	no	yes	no	no	yes	yes	yes	Enclosed	yes	Natural	Manual	Outside premises	yes	Kadaknath	no
AEK08CM7	Titan_EG0096_10793HD_Plate1_D10.CEL	AEK-08	Farm_AEK-08	8	Kada	no	yes	no	no	yes	yes	yes	Enclosed	yes	Natural	Manual	Outside premises	yes	Kadaknath	no
AEK08CM8	Titan_EG0096_10793HD_Plate1_E10.CEL	AEK-08	Farm_AEK-08	8	Kada	no	yes	no	no	yes	yes	yes	Enclosed	yes	Natural	Manual	Outside premises	yes	Kadaknath	no
AEK09CM1	Titan_EG0103_10793HD_Plate8_D01.CEL	AEK-09	Farm_AEK-09	9	Kada	no	yes	no	no	yes	no	yes	Enclosed	yes	Natural	Manual	Within premises	no	Kadaknath	no
AEK09CM10	Titan_EG0103_10793HD_Plate8_D02.CEL	AEK-09	Farm_AEK-09	9	Kada	no	yes	no	no	yes	no	yes	Enclosed	yes	Natural	Manual	Within premises	no	Kadaknath	no
AEK09CM2	Titan_EG0103_10793HD_Plate8_E01.CEL	AEK-09	Farm_AEK-09	9	Kada	no	yes	no	no	yes	no	yes	Enclosed	yes	Natural	Manual	Within premises	no	Kadaknath	no
AEK09CM3	Titan_EG0103_10793HD_Plate8_F01.CEL	AEK-09	Farm_AEK-09	9	Kada	no	yes	no	no	yes	no	yes	Enclosed	yes	Natural	Manual	Within premises	no	Kadaknath	no
AEK09CM5	Titan_EG0103_10793HD_Plate8_H01.CEL	AEK-09	Farm_AEK-09	9	Kada	no	yes	no	no	yes	no	yes	Enclosed	yes	Natural	Manual	Within premises	no	Kadaknath	no
AEK09CM6	Titan_EG0103_10793HD_Plate8_A10.CEL	AEK-09	Farm_AEK-09	9	Kada	no	yes	no	no	yes	no	yes	Enclosed	yes	Natural	Manual	Within premises	no	Kadaknath	no
AEK09CM7	Titan_EG0103_10793HD_Plate8_A02.CEL	AEK-09	Farm_AEK-09	9	Kada	no	yes	no	no	yes	no	yes	Enclosed	yes	Natural	Manual	Within premises	no	Kadaknath	no
AEK09CM8	Titan_EG0103_10793HD_Plate8_B02.CEL	AEK-09	Farm_AEK-09	9	Kada	no	yes	no	no	yes	no	yes	Enclosed	yes	Natural	Manual	Within premises	no	Kadaknath	no
AEK09CM9	Titan_EG0103_10793HD_Plate8_C02.CEL	AEK-09	Farm_AEK-09	9	Kada	no	yes	no	no	yes	no	yes	Enclosed	yes	Natural	Manual	Within premises	no	Kadaknath	no
AEK10CM1	Titan_EG0103_10793HD_Plate8_E02.CEL	AEK-10	Farm_AEK-10	10	Kada	no	yes	yes	no	yes	no	no	Enclosed	yes	Natural	Manual	Within premises	no	Kadaknath	no
AEK10CM3	Titan_EG0103_10793HD_Plate8_G02.CEL	AEK-10	Farm_AEK-10	10	Kada	no	yes	yes	no	yes	no	no	Enclosed	yes	Natural	Manual	Within premises	no	Kadaknath	no
AEK10CM4	Titan_EG0103_10793HD_Plate8_H02.CEL	AEK-10	Farm_AEK-10	10	Kada	no	yes	yes	no	yes	no	no	Enclosed	yes	Natural	Manual	Within premises	no	Kadaknath	no
AEK10CM5	Titan_EG0103_10793HD_Plate8_A03.CEL	AEK-10	Farm_AEK-10	10	Kada	no	yes	yes	no	yes	no	no	Enclosed	yes	Natural	Manual	Within premises	no	Kadaknath	no
AEK10CM8	Titan_EG0103_10793HD_Plate8_D03.CEL	AEK-10	Farm_AEK-10	10	Kada	no	yes	yes	no	yes	no	no	Enclosed	yes	Natural	Manual	Within premises	no	Kadaknath	no
AEK11CM1	Titan_EG0103_10793HD_Plate8_G03.CEL	AEK-11	Farm_AEK-11	11	Kada	no	no	no	no	no	no	no	Enclosed	no	Natural	Manual	Within premises	no	Kadaknath	no
AEK11CM10	Titan_EG0103_10793HD_Plate8_H04.CEL	AEK-11	Farm_AEK-11	11	Kada	no	no	no	no	no	no	no	Enclosed	no	Natural	Manual	Within premises	no	Kadaknath	no
AEK11CM2	Titan_EG0103_10793HD_Plate8_H03.CEL	AEK-11	Farm_AEK-11	11	Kada	no	no	no	no	no	no	no	Enclosed	no	Natural	Manual	Within premises	no	Kadaknath	no
AEK11CM3	Titan_EG0103_10793HD_Plate8_A04.CEL	AEK-11	Farm_AEK-11	11	Kada	no	no	no	no	no	no	no	Enclosed	no	Natural	Manual	Within premises	no	Kadaknath	no
AEK11CM4	Titan_EG0103_10793HD_Plate8_B04.CEL	AEK-11	Farm_AEK-11	11	Kada	no	no	no	no	no	no	no	Enclosed	no	Natural	Manual	Within premises	no	Kadaknath	no
AEK11CM5	Titan_EG0103_10793HD_Plate8_C04.CEL	AEK-11	Farm_AEK-11	11	Kada	no	no	no	no	no	no	no	Enclosed	no	Natural	Manual	Within premises	no	Kadaknath	no
AEK11CM6	Titan_EG0103_10793HD_Plate8_D04.CEL	AEK-11	Farm_AEK-11	11	Kada	no	no	no	no	no	no	no	Enclosed	no	Natural	Manual	Within premises	no	Kadaknath	no
AEK11CM7	Titan_EG0103_10793HD_Plate8_E04.CEL	AEK-11	Farm_AEK-11	11	Kada	no	no	no	no	no	no	no	Enclosed	no	Natural	Manual	Within premises	no	Kadaknath	no
AEK11CM8	Titan_EG0103_10793HD_Plate8_F04.CEL	AEK-11	Farm_AEK-11	11	Kada	no	no	no	no	no	no	no	Enclosed	no	Natural	Manual	Within premises	no	Kadaknath	no
AEK11CM9	Titan_EG0103_10793HD_Plate8_G04.CEL	AEK-11	Farm_AEK-11	11	Kada	no	no	no	no	no	no	no	Enclosed	no	Natural	Manual	Within premises	no	Kadaknath	no
AEK12CM1	Titan_EG0103_10793HD_Plate8_A05.CEL	AEK-12	Farm_AEK-12	12	Kada	no	no	no	no	no	no	no	open	no	Artificial	Manual	Outside premises	no	Kadaknath	no
AEK12CM10	Titan_EG0103_10793HD_Plate8_B06.CEL	AEK-12	Farm_AEK-12	12	Kada	no	no	no	no	no	no	no	open	no	Artificial	Manual	Outside premises	no	Kadaknath	no
AEK12CM2	Titan_EG0103_10793HD_Plate8_B05.CEL	AEK-12	Farm_AEK-12	12	Kada	no	no	no	no	no	no	no	open	no	Artificial	Manual	Outside premises	no	Kadaknath	no
AEK12CM3	Titan_EG0103_10793HD_Plate8_C05.CEL	AEK-12	Farm_AEK-12	12	Kada	no	no	no	no	no	no	no	open	no	Artificial	Manual	Outside premises	no	Kadaknath	no
AEK12CM4	Titan_EG0103_10793HD_Plate8_D05.CEL	AEK-12	Farm_AEK-12	12	Kada	no	no	no	no	no	no	no	open	no	Artificial	Manual	Outside premises	no	Kadaknath	no
AEK12CM5	Titan_EG0103_10793HD_Plate8_E05.CEL	AEK-12	Farm_AEK-12	12	Kada	no	no	no	no	no	no	no	open	no	Artificial	Manual	Outside premises	no	Kadaknath	no
AEK12CM6	Titan_EG0103_10793HD_Plate8_F05.CEL	AEK-12	Farm_AEK-12	12	Kada	no	no	no	no	no	no	no	open	no	Artificial	Manual	Outside premises	no	Kadaknath	no
AEK12CM7	Titan_EG0103_10793HD_Plate8_G05.CEL	AEK-12	Farm_AEK-12	12	Kada	no	no	no	no	no	no	no	open	no	Artificial	Manual	Outside premises	no	Kadaknath	no
AEK12CM8	Titan_EG0103_10793HD_Plate8_H05.CEL	AEK-12	Farm_AEK-12	12	Kada	no	no	no	no	no	no	no	open	no	Artificial	Manual	Outside premises	no	Kadaknath	no
AEK12CM9	Titan_EG0103_10793HD_Plate8_A06.CEL	AEK-12	Farm_AEK-12	12	Kada	no	no	no	no	no	no	no	open	no	Artificial	Manual	Outside premises	no	Kadaknath	no
AEK13CM1	Titan_EG0103_10793HD_Plate8_C06.CEL	AEK-13	Farm_AEK-13	13	Kada	no	no	no	no	no	no	no	open	no	Artificial	Manual	Outside premises	no	Kadaknath	no
AEK13CM10	Titan_EG0103_10793HD_Plate8_D07.CEL	AEK-13	Farm_AEK-13	13	Kada	no	no	no	no	no	no	no	open	no	Artificial	Manual	Outside premises	no	Kadaknath	no
AEK13CM2	Titan_EG0103_10793HD_Plate8_D06.CEL	AEK-13	Farm_AEK-13	13	Kada	no	no	no	no	no	no	no	open	no	Artificial	Manual	Outside premises	no	Kadaknath	no
AEK13CM3	Titan_EG0103_10793HD_Plate8_E06.CEL	AEK-13	Farm_AEK-13	13	Kada	no	no	no	no	no	no	no	open	no	Artificial	Manual	Outside premises	no	Kadaknath	no
AEK13CM4	Titan_EG0103_10793HD_Plate8_F06.CEL	AEK-13	Farm_AEK-13	13	Kada	no	no	no	no	no	no	no	open	no	Artificial	Manual	Outside premises	no	Kadaknath	no
AEK13CM5	Titan_EG0103_10793HD_Plate8_G06.CEL	AEK-13	Farm_AEK-13	13	Kada	no	no	no	no	no	no	no	open	no	Artificial	Manual	Outside premises	no	Kadaknath	no
AEK13CM6	Titan_EG0103_10793HD_Plate8_H06.CEL	AEK-13	Farm_AEK-13	13	Kada	no	no	no	no	no	no	no	open	no	Artificial	Manual	Outside premises	no	Kadaknath	no
AEK13CM7	Titan_EG0103_10793HD_Plate8_A07.CEL	AEK-13	Farm_AEK-13	13	Kada	no	no	no	no	no	no	no	open	no	Artificial	Manual	Outside premises	no	Kadaknath	no
AEK13CM8	Titan_EG0103_10793HD_Plate8_B07.CEL	AEK-13	Farm_AEK-13	13	Kada	no	no	no	no	no	no	no	open	no	Artificial	Manual	Outside premises	no	Kadaknath	no
AEK13CM9	Titan_EG0103_10793HD_Plate8_C07.CEL	AEK-13	Farm_AEK-13	13	Kada	no	no	no	no	no	no	no	open	no	Artificial	Manual	Outside premises	no	Kadaknath	no
AEK14CM1	Titan_EG0103_10793HD_Plate8_E07.CEL	AEK-14	Farm_AEK-14	14	Kada	no	no	no	no	no	no	no	open	no	Natural	Manual	Within premises	no	Kadaknath	no
AEK14CM10	Titan_EG0103_10793HD_Plate8_F08.CEL	AEK-14	Farm_AEK-14	14	Kada	no	no	no	no	no	no	no	open	no	Natural	Manual	Within premises	no	Kadaknath	no
AEK14CM2	Titan_EG0103_10793HD_Plate8_F07.CEL	AEK-14	Farm_AEK-14	14	Kada	no	no	no	no	no	no	no	open	no	Natural	Manual	Within premises	no	Kadaknath	no
AEK14CM3	Titan_EG0103_10793HD_Plate8_G07.CEL	AEK-14	Farm_AEK-14	14	Kada	no	no	no	no	no	no	no	open	no	Natural	Manual	Within premises	no	Kadaknath	no
AEK14CM4	Titan_EG0103_10793HD_Plate8_H07.CEL	AEK-14	Farm_AEK-14	14	Kada	no	no	no	no	no	no	no	open	no	Natural	Manual	Within premises	no	Kadaknath	no
AEK14CM5	Titan_EG0103_10793HD_Plate8_A08.CEL	AEK-14	Farm_AEK-14	14	Kada	no	no	no	no	no	no	no	open	no	Natural	Manual	Within premises	no	Kadaknath	no
AEK14CM6	Titan_EG0103_10793HD_Plate8_B08.CEL	AEK-14	Farm_AEK-14	14	Kada	no	no	no	no	no	no	no	open	no	Natural	Manual	Within premises	no	Kadaknath	no
AEK14CM7	Titan_EG0103_10793HD_Plate8_C08.CEL	AEK-14	Farm_AEK-14	14	Kada	no	no	no	no	no	no	no	open	no	Natural	Manual	Within premises	no	Kadaknath	no
AEK14CM8	Titan_EG0103_10793HD_Plate8_D08.CEL	AEK-14	Farm_AEK-14	14	Kada	no	no	no	no	no	no	no	open	no	Natural	Manual	Within premises	no	Kadaknath	no
AEK14CM9	Titan_EG0103_10793HD_Plate8_E08.CEL	AEK-14	Farm_AEK-14	14	Kada	no	no	no	no	no	no	no	open	no	Natural	Manual	Within premises	no	Kadaknath	no
AEK15CM1	Titan_EG0103_10793HD_Plate8_G08.CEL	AEK-15	Farm_AEK-15	15	Kada	no	no	no	no	yes	no	no	open	no	Natural	Manual	Within premises	no	Kadaknath	no
AEK15CM10	Titan_EG0103_10793HD_Plate8_H09.CEL	AEK-15	Farm_AEK-15	15	Kada	no	no	no	no	yes	no	no	open	no	Natural	Manual	Within premises	no	Kadaknath	no
AEK15CM2	Titan_EG0103_10793HD_Plate8_H08.CEL	AEK-15	Farm_AEK-15	15	Kada	no	no	no	no	yes	no	no	open	no	Natural	Manual	Within premises	no	Kadaknath	no
AEK15CM3	Titan_EG0103_10793HD_Plate8_A09.CEL	AEK-15	Farm_AEK-15	15	Kada	no	no	no	no	yes	no	no	open	no	Natural	Manual	Within premises	no	Kadaknath	no
AEK15CM4	Titan_EG0103_10793HD_Plate8_B09.CEL	AEK-15	Farm_AEK-15	15	Kada	no	no	no	no	yes	no	no	open	no	Natural	Manual	Within premises	no	Kadaknath	no
AEK15CM5	Titan_EG0103_10793HD_Plate8_C09.CEL	AEK-15	Farm_AEK-15	15	Kada	no	no	no	no	yes	no	no	open	no	Natural	Manual	Within premises	no	Kadaknath	no
AEK15CM6	Titan_EG0103_10793HD_Plate8_D09.CEL	AEK-15	Farm_AEK-15	15	Kada	no	no	no	no	yes	no	no	open	no	Natural	Manual	Within premises	no	Kadaknath	no
AEK15CM7	Titan_EG0103_10793HD_Plate8_E09.CEL	AEK-15	Farm_AEK-15	15	Kada	no	no	no	no	yes	no	no	open	no	Natural	Manual	Within premises	no	Kadaknath	no
AEK15CM8	Titan_EG0103_10793HD_Plate8_F09.CEL	AEK-15	Farm_AEK-15	15	Kada	no	no	no	no	yes	no	no	open	no	Natural	Manual	Within premises	no	Kadaknath	no
AEK15CM9	Titan_EG0103_10793HD_Plate8_G09.CEL	AEK-15	Farm_AEK-15	15	Kada	no	no	no	no	yes	no	no	open	no	Natural	Manual	Within premises	no	Kadaknath	no
