# Supplementary material for: Divergent host genetic architectures drive breed-specific modulation of the caecal microbiome in chickens
Source: Research Square preprint supplement (doi:10.21203/rs.3.rs-5953792/v1), 2025-02-06
Supplement: Supplementary file 2 [file c9f778df68a73987fd1a624e.xlsx]

## Sheet: Cobb400
Gene	SYMBOL	Traits	Location	Allele	Consequence	IMPACT	SIFT
ENSGALG00000003920		Campylobacter	4:1668702	T	missense_variant	MODERATE	deleterious(0.02)
ENSGALG00000003661	SETX	Fournierella	17:6805038-17:6808374	C,G,T	missense_variant	MODERATE	deleterious(0.05),deleterious(0.04),deleterious(0.02),deleterious(0.03)
ENSGALG00000027242	TTF1	Fournierella	17:6820399-17:6826181	A,C	missense_variant	MODERATE	deleterious(0.04),deleterious(0.03)
ENSGALG00000000264		PCoA2	Z:47469359	T	missense_variant	MODERATE	deleterious(0.03)
ENSGALG00000015340	TGS1	PCoA3	2:111085902	A	missense_variant	MODERATE	deleterious(0.02)
ENSGALG00000000891	NSUN5	Rikenellaceae_RC9_gut_group	19:502198	T	missense_variant	MODERATE	deleterious(0.03)
ENSGALG00000002083		Rikenellaceae_RC9_gut_group	20:2074307-20:2075439	A,C,T	missense_variant	MODERATE	deleterious(0),deleterious(0),deleterious(0.04),deleterious(0.01),deleterious(0.02),deleterious(0.03)
ENSGALG00000003118	ADGRA2	Rikenellaceae_RC9_gut_group	22:2521209	A	missense_variant	MODERATE	deleterious(0)
ENSGALG00000003498	TAF8	Rikenellaceae_RC9_gut_group	26:5071793	C	missense_variant	MODERATE	deleterious(0.05)
ENSGALG00000003499	MAST3	Rikenellaceae_RC9_gut_group	28:4121699	A	missense_variant	MODERATE	deleterious(0)
ENSGALG00000003665	PIGS	Rikenellaceae_RC9_gut_group	19:5883505	G	missense_variant	MODERATE	deleterious(0.01)
ENSGALG00000003766	KIAA0100	Rikenellaceae_RC9_gut_group	19:5906905-19:5908070	A,T	missense_variant	MODERATE	deleterious(0),deleterious(0.02)
ENSGALG00000004333	ABCA5	Rikenellaceae_RC9_gut_group	18:7959860-18:7962422	A,T	missense_variant	MODERATE	deleterious(0.01),deleterious(0.01)
ENSGALG00000008123	RINT1	Rikenellaceae_RC9_gut_group	1:14149637	A	missense_variant	MODERATE	deleterious(0)
ENSGALG00000009297	TELO2	Rikenellaceae_RC9_gut_group	14:14177665	A	missense_variant	MODERATE	deleterious(0.05)
ENSGALG00000009441	TAF1A	Rikenellaceae_RC9_gut_group	3:18161529	G	missense_variant	MODERATE	deleterious(0.05)
ENSGALG00000014071	ITPR2	Rikenellaceae_RC9_gut_group	1:67693634	T	missense_variant	MODERATE	deleterious(0.03)
ENSGALG00000016062	PSMG1	Rikenellaceae_RC9_gut_group	1:109268092	A	missense_variant	MODERATE	deleterious(0.01)
ENSGALG00000016065	BRWD1	Rikenellaceae_RC9_gut_group	1:109278681	G	missense_variant	MODERATE	deleterious(0.03)
ENSGALG00000021395		Rikenellaceae_RC9_gut_group	18:7925443-18:7943898	A,C	missense_variant	MODERATE	deleterious(0.02),deleterious(0.02),deleterious(0),deleterious(0.05),deleterious(0.03),deleterious(0)
ENSGALG00000023763		Rikenellaceae_RC9_gut_group	26:5080157	A	missense_variant	MODERATE	deleterious(0.01)
ENSGALG00000026077	ALDOC	Rikenellaceae_RC9_gut_group	19:5885686	C	missense_variant	MODERATE	deleterious(0)
ENSGALG00000028210		Rikenellaceae_RC9_gut_group	19:5946543	G	missense_variant,splice_region_variant	MODERATE	deleterious(0.01)
ENSGALG00000029674		Rikenellaceae_RC9_gut_group	19:507393-19:507720	A	missense_variant	MODERATE	deleterious(0.04),deleterious(0.02)
ENSGALG00000031807		Rikenellaceae_RC9_gut_group	26:5097188-26:5098933	A,T	missense_variant	MODERATE	deleterious(0.02),deleterious(0.03)
ENSGALG00000039499	LRRCC1	Rikenellaceae_RC9_gut_group	2:122586268	G	missense_variant	MODERATE	deleterious(0)
ENSGALG00000041034	MIA3	Rikenellaceae_RC9_gut_group	3:18147884	T	missense_variant	MODERATE	deleterious(0.05)
ENSGALG00000045949		Rikenellaceae_RC9_gut_group	1:14151220	A	missense_variant	MODERATE	deleterious(0)
ENSGALG00000048771		Rikenellaceae_RC9_gut_group	19:5889914-19:5894086	A,C,G	missense_variant	MODERATE	deleterious(0.01),deleterious(0.01),deleterious(0.04),deleterious(0.03)
ENSGALG00000050043		Rikenellaceae_RC9_gut_group	1:127651126-1:127651796	A,G,T	missense_variant	MODERATE	deleterious(0.03),deleterious(0.02),deleterious(0.04),deleterious(0.04),deleterious(0.02)
ENSGALG00000054775		Rikenellaceae_RC9_gut_group	2:122513518-2:122514649	A,C,G,T	missense_variant	MODERATE	deleterious(0.03),deleterious(0.01),deleterious(0.01),deleterious(0),deleterious(0),deleterious(0.02),deleterious(0.01),deleterious(0.01)
ENSGALG00000013878	PCYOX1	Ruminococcaceae_UCG_014	22:4143283	G	missense_variant	MODERATE	deleterious(0.04)
ENSGALG00000051459		Ruminococcaceae_UCG_014	22:4152138-22:4152675	A,G	missense_variant	MODERATE	deleterious(0.03),deleterious(0),deleterious(0.02),deleterious(0),deleterious(0.03)

## Sheet: Kadaknath
Gene	SYMBOL	Traits	Location	Allele	Consequence	IMPACT	SIFT
ENSGALG00000003495	ALDH9A1	Bacteroides	8:5861839	C	missense_variant	MODERATE	deleterious(0.03)
ENSGALG00000005188	MINDY4	Bacteroides	2:1072625-2:1092856	C,G	missense_variant,missense_variant,splice_region_variant	MODERATE	deleterious(0),deleterious(0.04)
ENSGALG00000005778		Bacteroides	15:7992520-15:7992527	T	missense_variant	MODERATE	deleterious(0),deleterious(0.02)
ENSGALG00000006106	TNFRSF6B	Bacteroides	20:9652463-20:9652509	A	missense_variant	MODERATE	deleterious(0.01),deleterious(0.02)
ENSGALG00000006123		Bacteroides	20:9665430	T	missense_variant	MODERATE	deleterious(0)
ENSGALG00000006138	HELZ2	Bacteroides	20:9745860	G	missense_variant	MODERATE	deleterious(0.02)
ENSGALG00000006525	NCAPG2	Bacteroides	2:9542160	C	missense_variant	MODERATE	deleterious(0.04)
ENSGALG00000006542	ESYT2	Bacteroides	2:9557745	G	missense_variant	MODERATE	deleterious(0.05)
ENSGALG00000013101		Bacteroides	16:2283902-16:2294842	A,C,T	missense_variant	MODERATE	deleterious(0.01),deleterious(0.01),deleterious(0.03),deleterious(0.04),deleterious(0),deleterious(0.04)
ENSGALG00000047837		Bacteroides	2:1024333-2:1024335	A,C	missense_variant	MODERATE	deleterious(0.02),deleterious(0.03)
ENSGALG00000049448		Bacteroides	16:2303629-16:2304257	A,C,G	missense_variant	MODERATE	deleterious(0.01),deleterious(0.05),deleterious(0.01)
ENSGALG00000050131		Bacteroides	16:2297235-16:2297562	A,C,G	missense_variant	MODERATE	deleterious(0),deleterious(0.04),deleterious(0.03),deleterious(0.04),deleterious(0.01),deleterious(0.01)
ENSGALG00000050182		Bacteroides	2:1055769	T	missense_variant	MODERATE	deleterious(0.01)
ENSGALG00000054264		Bacteroides	2:1061370	T	missense_variant	MODERATE	deleterious(0.02)
ENSGALG00000003661	SETX	Bacteroides,Erysipelotrichaceae_X,PCoA4	17:6790019-17:6808374	A,C,G,T	missense_variant	MODERATE	deleterious(0.04),deleterious(0.05),deleterious(0.04),deleterious(0.02),deleterious(0.03)
ENSGALG00000027242	TTF1	Bacteroides,Erysipelotrichaceae_X,PCoA4	17:6820399-17:6826181	A,C	missense_variant	MODERATE	deleterious(0.04),deleterious(0.01),deleterious(0.03)
ENSGALG00000002346	CLSPN	Bacteroides,Ruminococcus.1	23:4373240-23:4375818	G,T	missense_variant	MODERATE	deleterious(0.04),deleterious(0)
ENSGALG00000010061	LRBA	Cloacibacillus	4:32872969	C	missense_variant	MODERATE	deleterious(0.02)
ENSGALG00000032386	DCLK2	Cloacibacillus	4:32804437	G	missense_variant	MODERATE	deleterious(0.01)
ENSGALG00000033769		Cloacibacillus	1:38115494-1:38115948	A,T	missense_variant	MODERATE	deleterious(0.01),deleterious(0.03),deleterious(0.01)
ENSGALG00000001849	BSN	Clostridiales.vadinBB60.group_X	12:2920447-12:2946803	A,C,T	missense_variant	MODERATE	deleterious(0),deleterious(0),deleterious(0),deleterious(0.03),deleterious(0.02)
ENSGALG00000002784	APEH	Clostridiales.vadinBB60.group_X	12:2911912	C	missense_variant	MODERATE	deleterious(0.03)
ENSGALG00000004367	AWAT1	Clostridiales.vadinBB60.group_X	4:1221823	A	missense_variant	MODERATE	deleterious(0.04)
ENSGALG00000004401	WNT11B	Clostridiales.vadinBB60.group_X	4:1204608-4:1205003	A,T	missense_variant	MODERATE	deleterious(0.03),deleterious(0)
ENSGALG00000028681		Clostridiales.vadinBB60.group_X	4:1263043-4:1264205	A	missense_variant	MODERATE	deleterious(0.04),deleterious(0.03),deleterious(0.01)
ENSGALG00000033303		Clostridiales.vadinBB60.group_X	12:2905999-12:2909788	A,G,T	missense_variant	MODERATE	deleterious(0),deleterious(0.03),deleterious(0.03),deleterious(0.01),deleterious(0),deleterious(0),deleterious(0.02),deleterious(0.02),deleterious(0),deleterious(0.03),deleterious(0.03),deleterious(0.02),deleterious(0.02),deleterious(0)
ENSGALG00000038269		Clostridiales.vadinBB60.group_X	5:515100	G	missense_variant	MODERATE	deleterious(0.02)
ENSGALG00000039347	UNC93B1	Clostridiales.vadinBB60.group_X	5:556810	A	missense_variant	MODERATE	deleterious(0)
ENSGALG00000042794	ZFAND1	Clostridiales.vadinBB60.group_X	2:121410228	C	missense_variant	MODERATE	deleterious(0.04)
ENSGALG00000044628		Clostridiales.vadinBB60.group_X	4:1213503	A	missense_variant	MODERATE	deleterious(0)
ENSGALG00000051432		Clostridiales.vadinBB60.group_X	21:1261858-21:1262477	C,T	missense_variant	MODERATE	deleterious(0.01),deleterious(0.03)
ENSGALG00000054835		Clostridiales.vadinBB60.group_X	5:538253-5:539133	A,C,T	missense_variant,missense_variant,splice_region_variant	MODERATE	deleterious(0.02),deleterious(0.04),deleterious(0.02),deleterious(0),deleterious(0),deleterious(0.01)
ENSGALG00000003527	ARRDC2	Clostridiales.vadinBB60.group_X,Ruminococcaceae.UCG.009,Ruminococcus.1	28:4149076-28:4154229	A	missense_variant	MODERATE	deleterious(0),deleterious(0.01)
ENSGALG00000013621	ATP6V1H	Erysipelotrichaceae_X	2:110272741	C	missense_variant,splice_region_variant	MODERATE	deleterious(0.03)
ENSGALG00000008207	FBXW8	Helicobacter	15:11677524	T	missense_variant,splice_region_variant	MODERATE	deleterious(0)
ENSGALG00000054775		Helicobacter	2:122513518-2:122514649	A,C,G,T	missense_variant	MODERATE	deleterious(0.03),deleterious(0.01),deleterious(0.01),deleterious(0),deleterious(0.02),deleterious(0.01),deleterious(0.01)
ENSGALG00000008810	FAM161A	Parasutterella	3:15445199-3:15451241	A,C,G,T	missense_variant	MODERATE	deleterious(0.01),deleterious(0.01),deleterious(0.01),deleterious(0),deleterious(0),deleterious(0),deleterious(0.05)
ENSGALG00000008815	LRRN4	Parasutterella	3:15423394-3:15428340	A,G	missense_variant	MODERATE	deleterious(0.03),deleterious(0.05)
ENSGALG00000036971	FGF12	Parasutterella	9:13611602	T	missense_variant	MODERATE	deleterious(0.03)
ENSGALG00000024136		PCoA10	25:2266936	T	missense_variant	MODERATE	deleterious(0.02)
ENSGALG00000026987		PCoA10	25:2167002-25:2167052	G	missense_variant	MODERATE	deleterious(0.01),deleterious(0.02)
ENSGALG00000027640		PCoA10	25:2156426-25:2156572	C,T	missense_variant	MODERATE	deleterious(0),deleterious(0.02)
ENSGALG00000028706	F-KER	PCoA10	25:2173689	G	missense_variant	MODERATE	deleterious(0.02)
ENSGALG00000029144		PCoA10	25:2262355	A	missense_variant	MODERATE	deleterious(0.02)
ENSGALG00000039987		PCoA10	25:2179770	G	missense_variant	MODERATE	deleterious(0.02)
ENSGALG00000045026		PCoA10	25:2282370	G	missense_variant	MODERATE	deleterious(0)
ENSGALG00000047672		PCoA10	25:2150554-25:2150701	C,G,T	missense_variant	MODERATE	deleterious(0.02),deleterious(0.05),deleterious(0.02)
ENSGALG00000048841		PCoA10	25:2159882-25:2159932	G	missense_variant	MODERATE	deleterious(0.01),deleterious(0.02)
ENSGALG00000050271		PCoA10	25:2215759	C	missense_variant	MODERATE	deleterious(0.01)
ENSGALG00000053111		PCoA10	25:2163442-25:2163540	G,T	missense_variant	MODERATE	deleterious(0.01),deleterious(0.02),deleterious(0.05)
ENSGALG00000053966		PCoA10	25:2351508-25:2351659	C,G	missense_variant	MODERATE	deleterious(0.02),deleterious(0.01),deleterious(0)
ENSGALG00000054020		PCoA10	25:2153489	G	missense_variant	MODERATE	deleterious(0)
ENSGALG00000054186		PCoA10	25:2214305	T	missense_variant	MODERATE	deleterious(0.01)
ENSGALG00000000498	ACE	PCoA2	27:5078895	G	missense_variant	MODERATE	deleterious(0.05)
ENSGALG00000042009	HMMR	PCoA4	13:7445123-13:7445461	C,G	missense_variant	MODERATE	deleterious(0.01),deleterious(0.04)
ENSGALG00000035461	CHORDC1	PCoA9	1:188868450-1:188868480	A,T	missense_variant	MODERATE	deleterious(0),deleterious(0),deleterious(0)
ENSGALG00000036346	AMH	PCoA9	28:2111242	A	missense_variant	MODERATE	deleterious(0.04)
ENSGALG00000054821	NAALAD2	PCoA9	1:188915413	C	missense_variant	MODERATE	deleterious(0.05)
ENSGALG00000000740	APBA3	Ruminiclostridium	28:1084228	A	missense_variant	MODERATE	deleterious(0)
ENSGALG00000000748	TJP3	Ruminiclostridium	28:1091681-28:1092494	C,T	missense_variant	MODERATE	deleterious(0),deleterious(0.03)
ENSGALG00000027838	HMG20B	Ruminiclostridium	28:1149010	A	missense_variant	MODERATE	deleterious(0.02)
ENSGALG00000037888	TBXA2R	Ruminiclostridium	28:1142779	T	missense_variant	MODERATE	deleterious(0.02)
ENSGALG00000011655	IQCB1	Ruminococcaceae.UCG.009	7:26302335-7:26316863	G,T	missense_variant	MODERATE	deleterious(0),deleterious(0.05)
ENSGALG00000012256	UTRN	Ruminococcaceae.UCG.009,Shannon	3:46127091	A	missense_variant,splice_region_variant	MODERATE	deleterious(0.02)
