# Supplementary material for: Divergent host genetic architectures drive breed-specific modulation of the caecal microbiome in chickens
Source: Research Square preprint supplement (doi:10.21203/rs.3.rs-5953792/v1), 2025-02-06
Supplement: Supplementary file 3 [file ec5c542d63fe452fcf6c2656.docx]

*
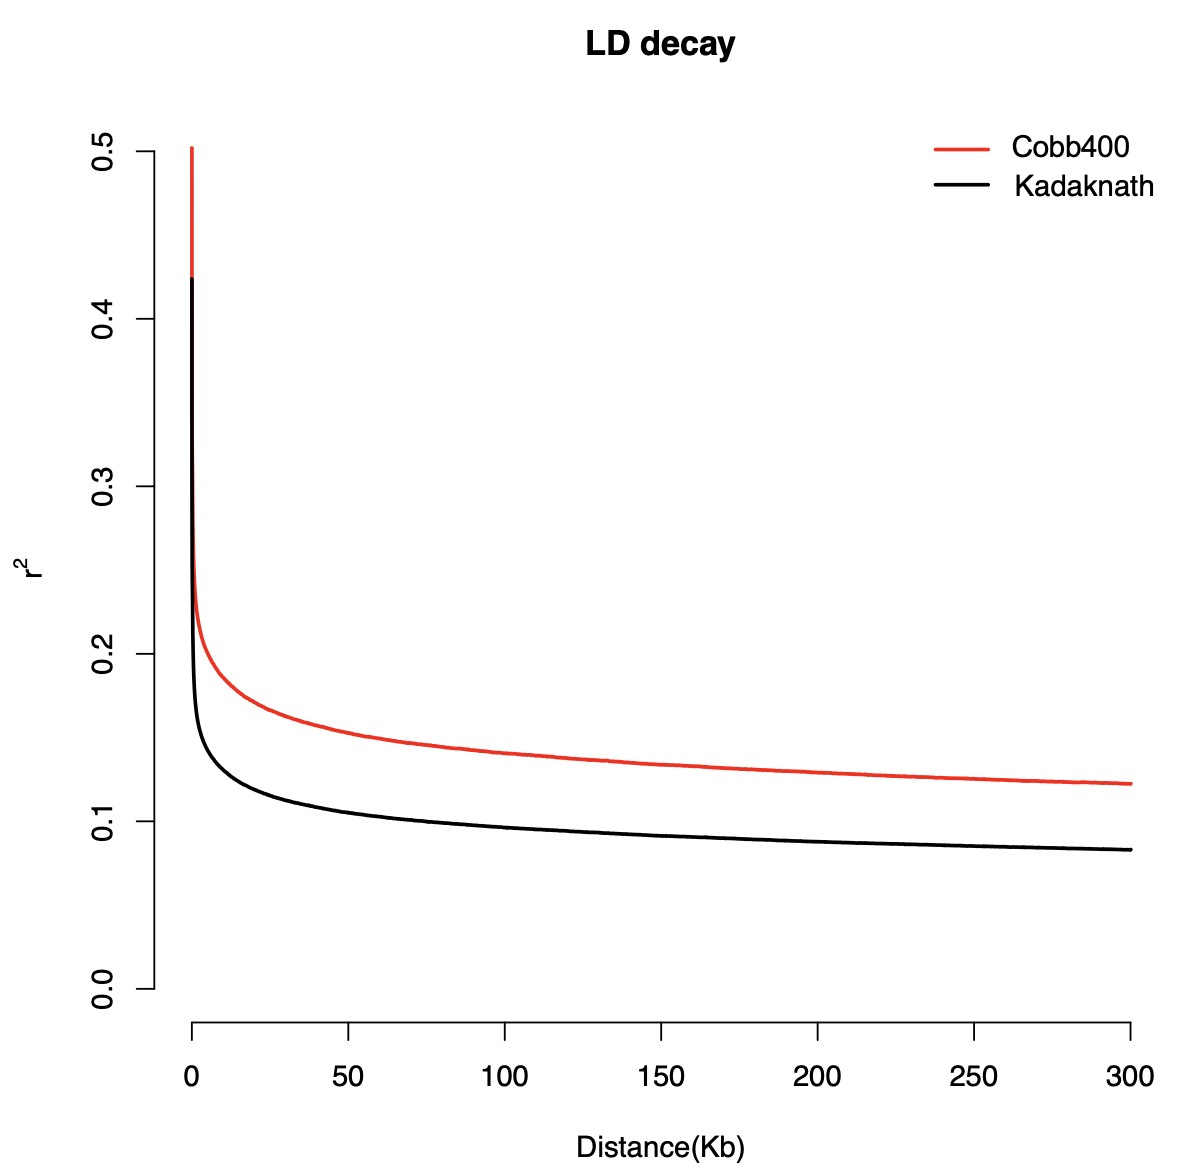
*

Figure 1 Linkage disequilibrium (LD) decay plots for Cobb400 (A) and Kadaknath (B) chickens from genotype data after quality control. The plots show the decline of LD (r2) with increasing SNP distance (in kilobases, ×100)


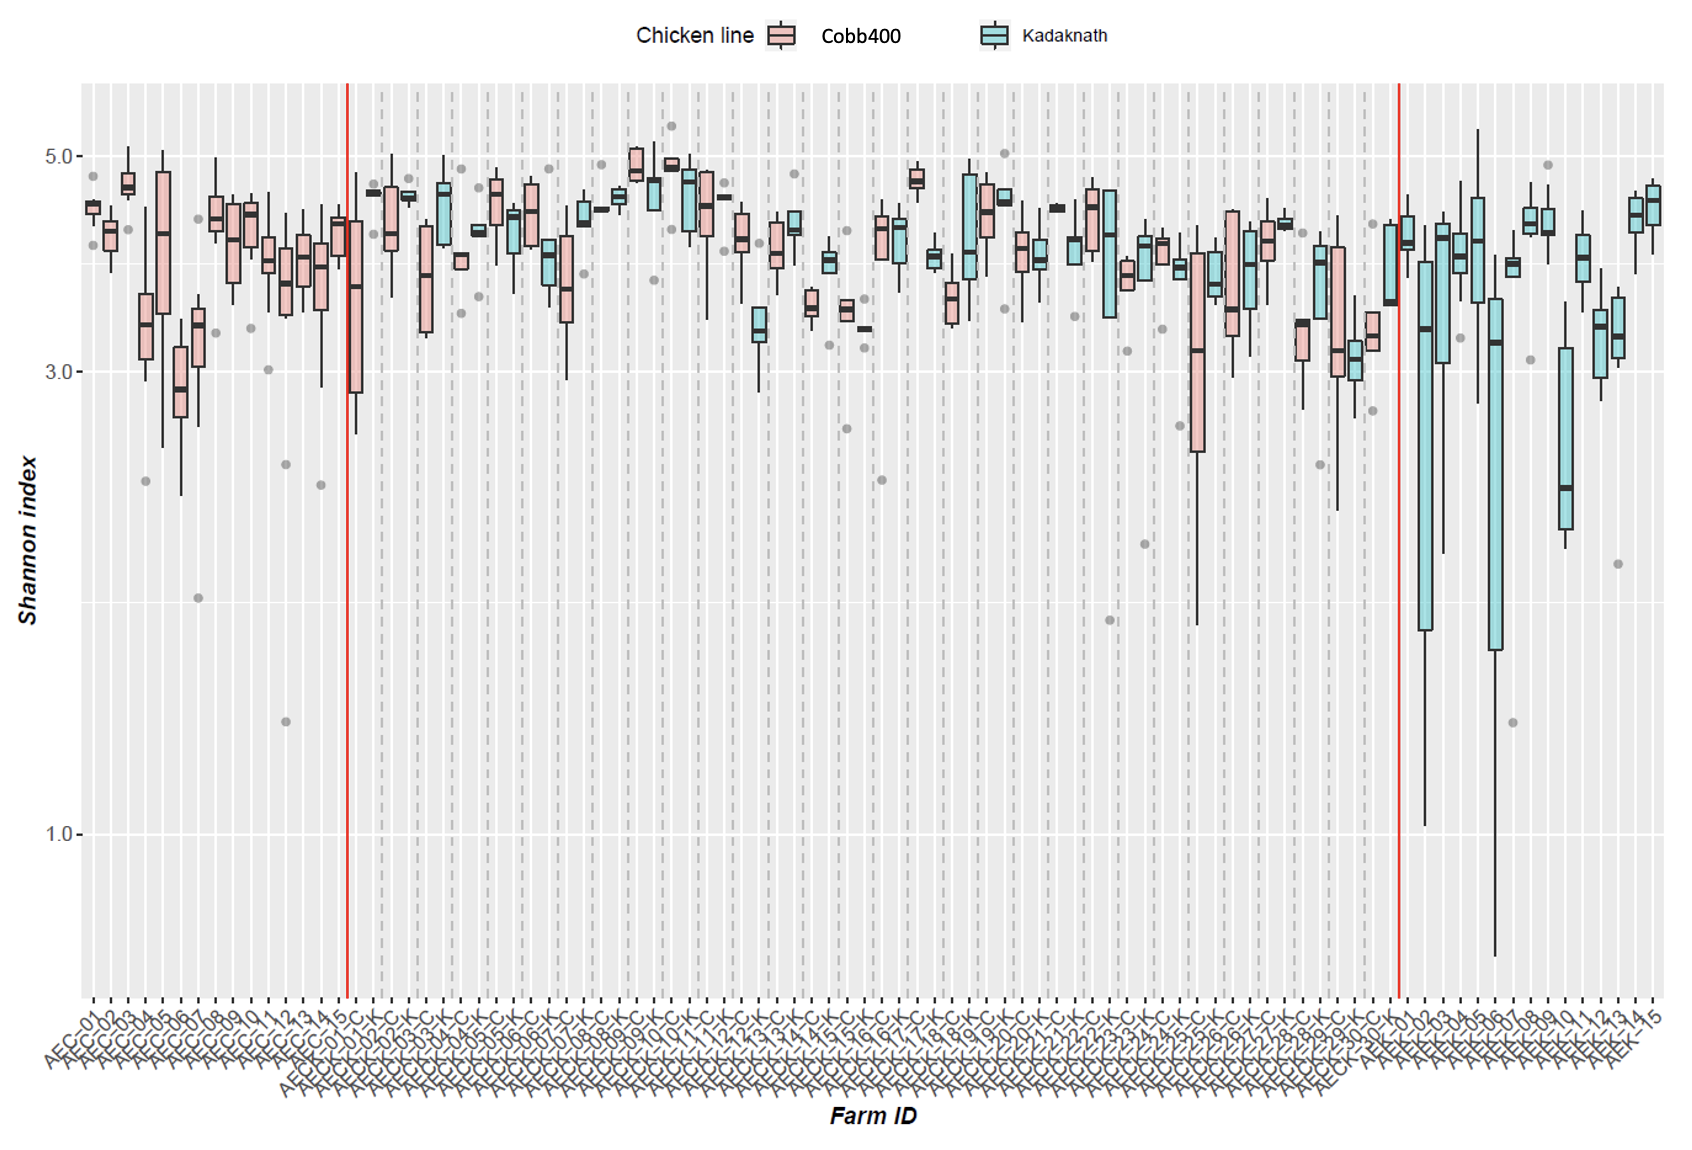


Figure 2 Shannon index alpha diversity distribution plots for Cobb400 and Kadaknath. X-axis shows the farms. AEC farms reared Cobb400 only, AEK farms reared Kadaknath only, AECK farms reared both breeds and the birds are separated in the plot by suffix _K (Kadaknath) and _C (Cobb400)


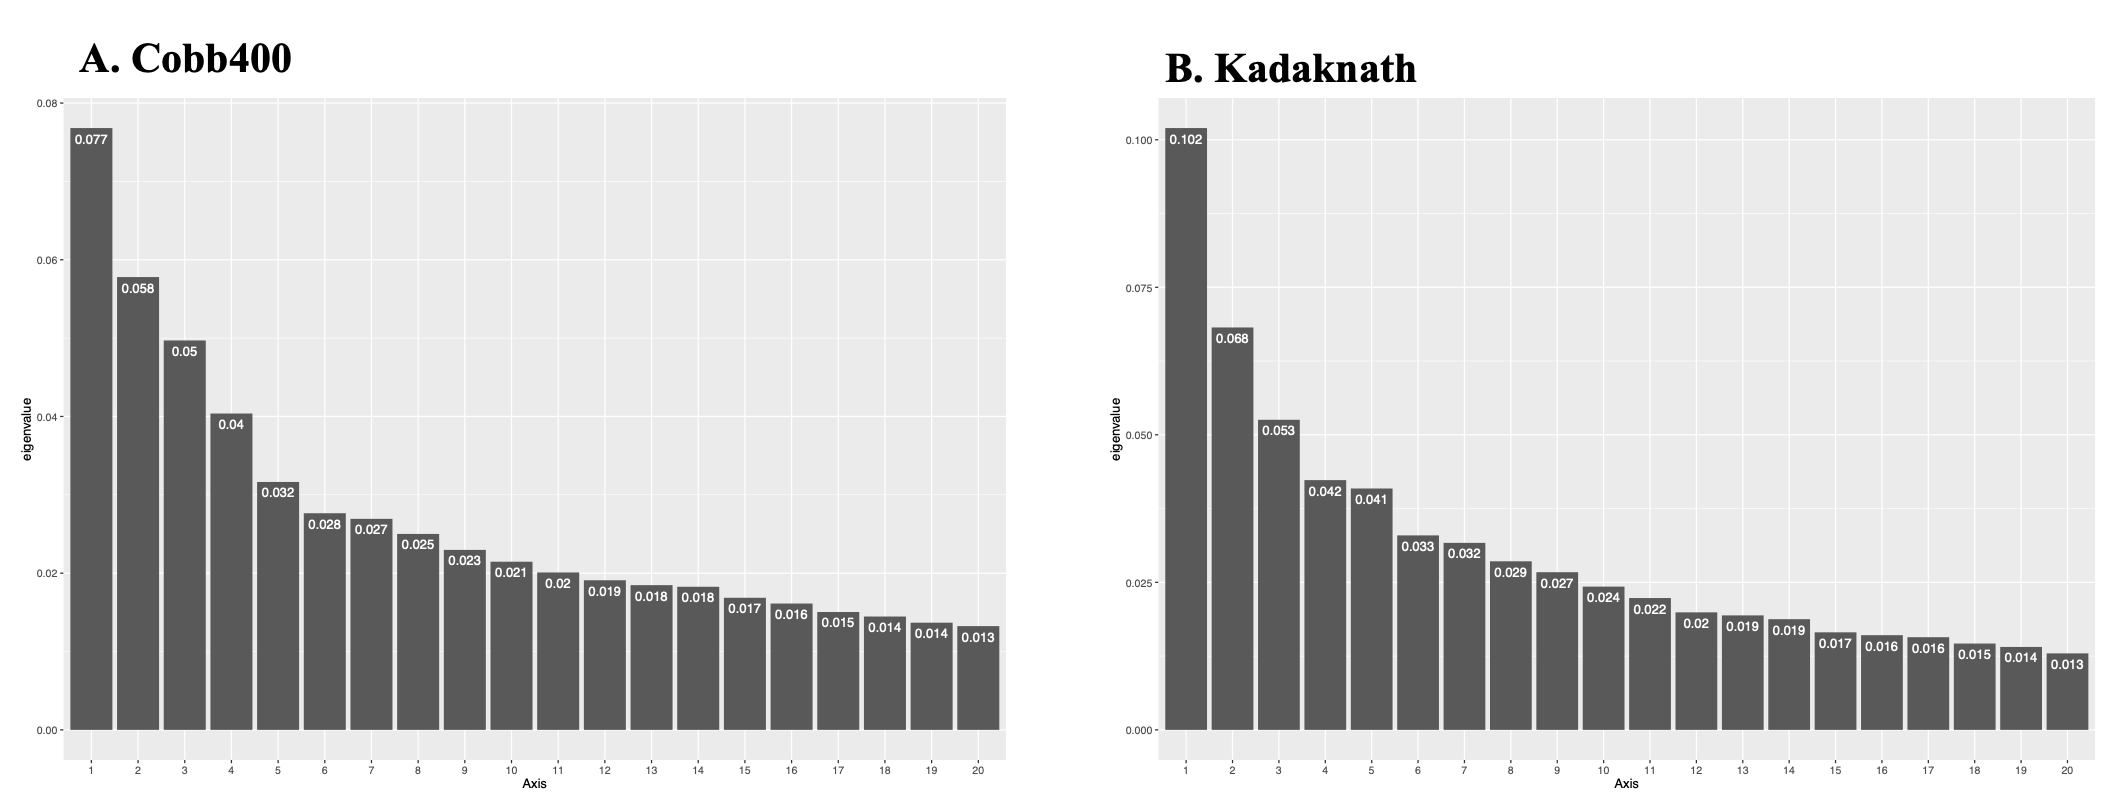


Figure 3. Scree-plot of the first 20 Principal Coordinate Analysis (PCoA) axes for Cobb400 commercial broiler (A) and Kadaknath (B) chickens from all farms.


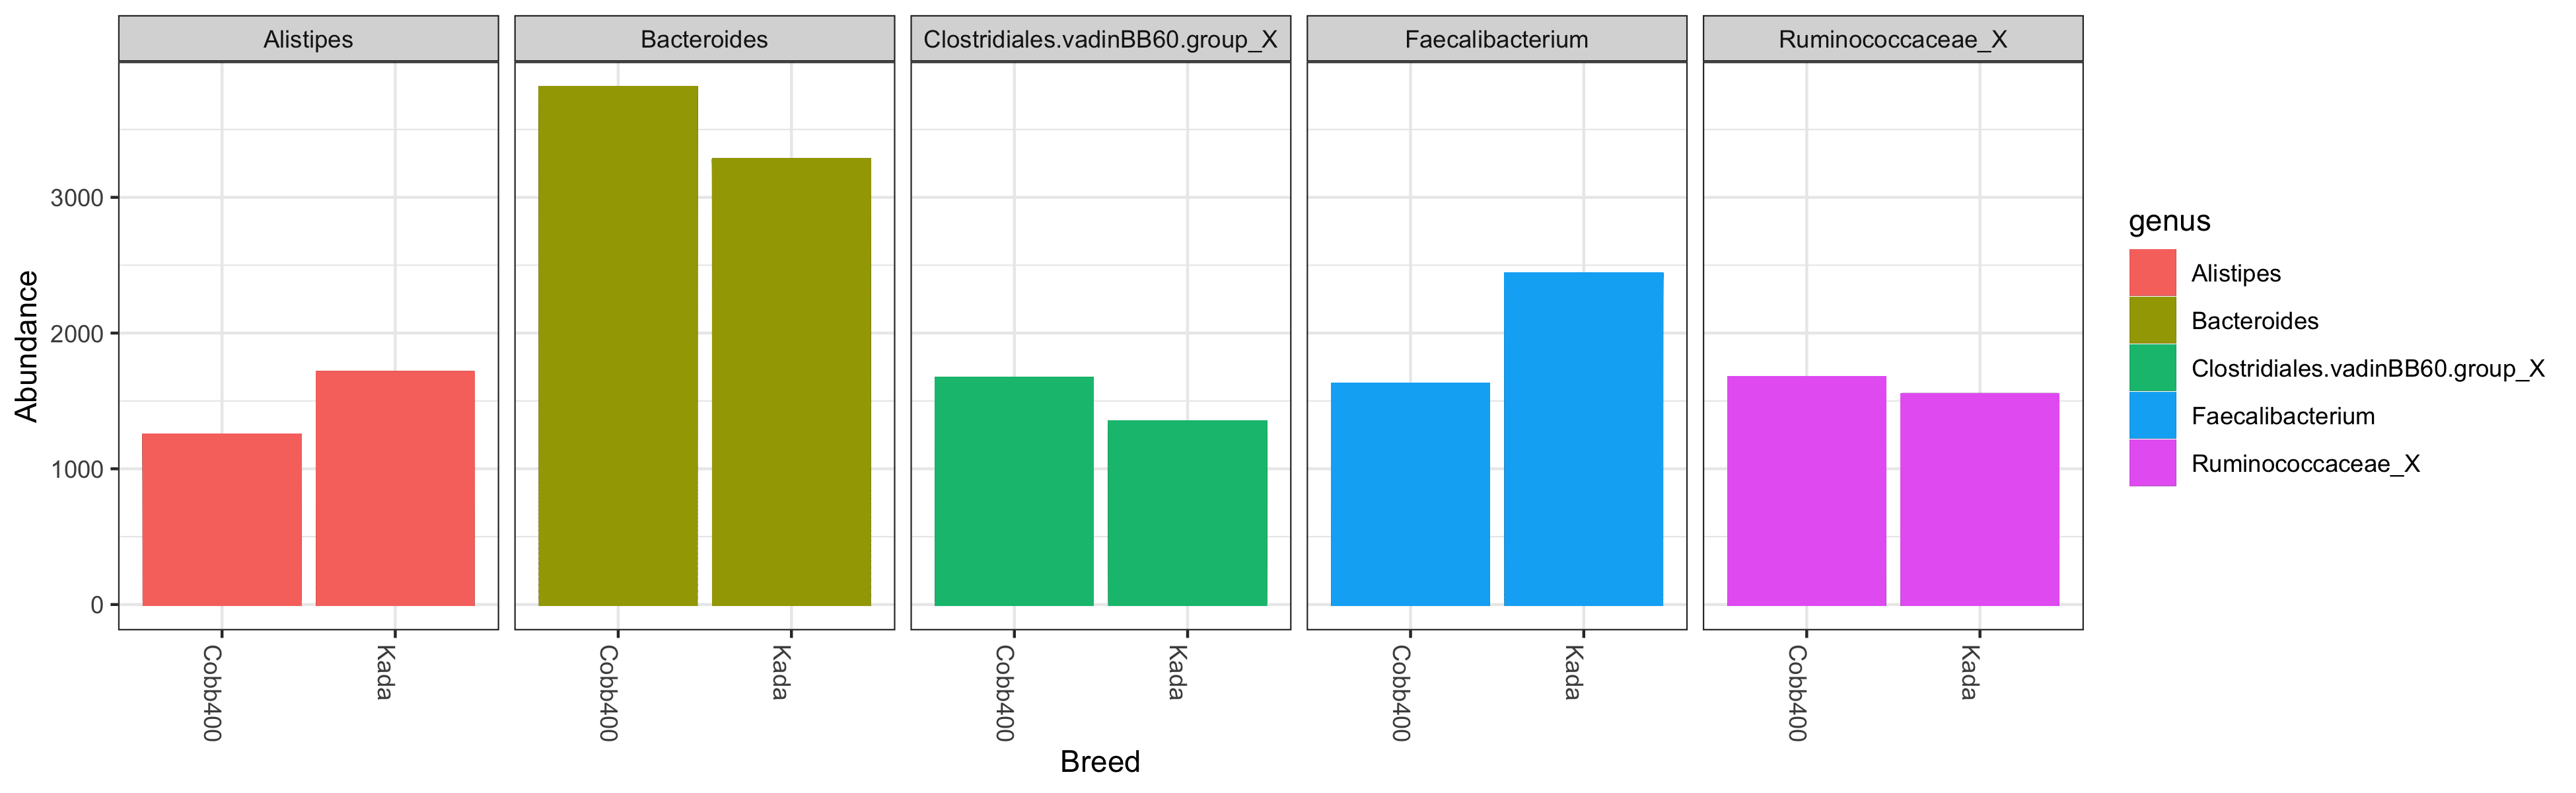


Figure 4 The five most abundant genera detected in caecal contents sampled from Cobb400 and Kadaknath (Kada) chickens.


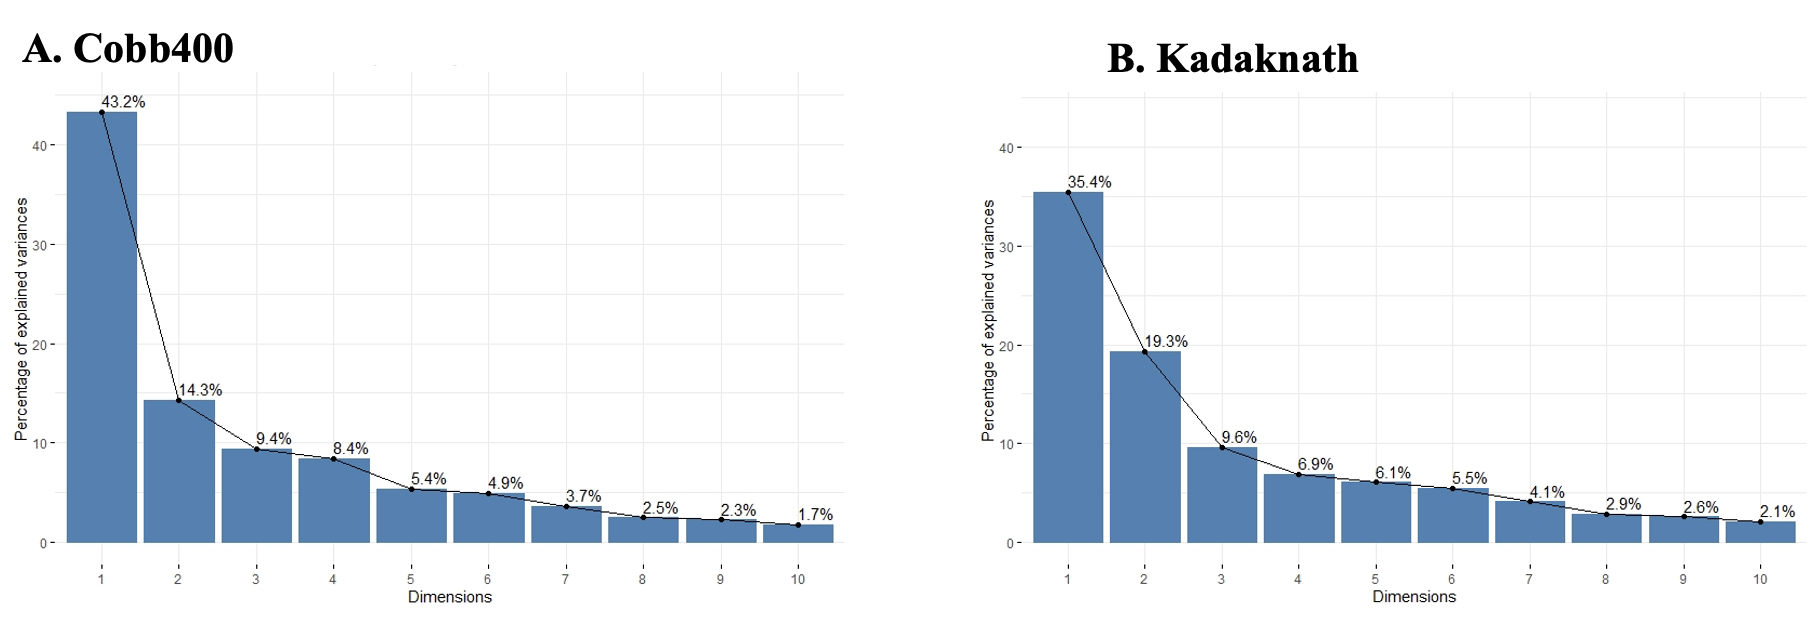


Figure 5 Farm variability for commercial (A) Cobb400 broilers and (B) Kadaknath using Multiple correspondence analyses.


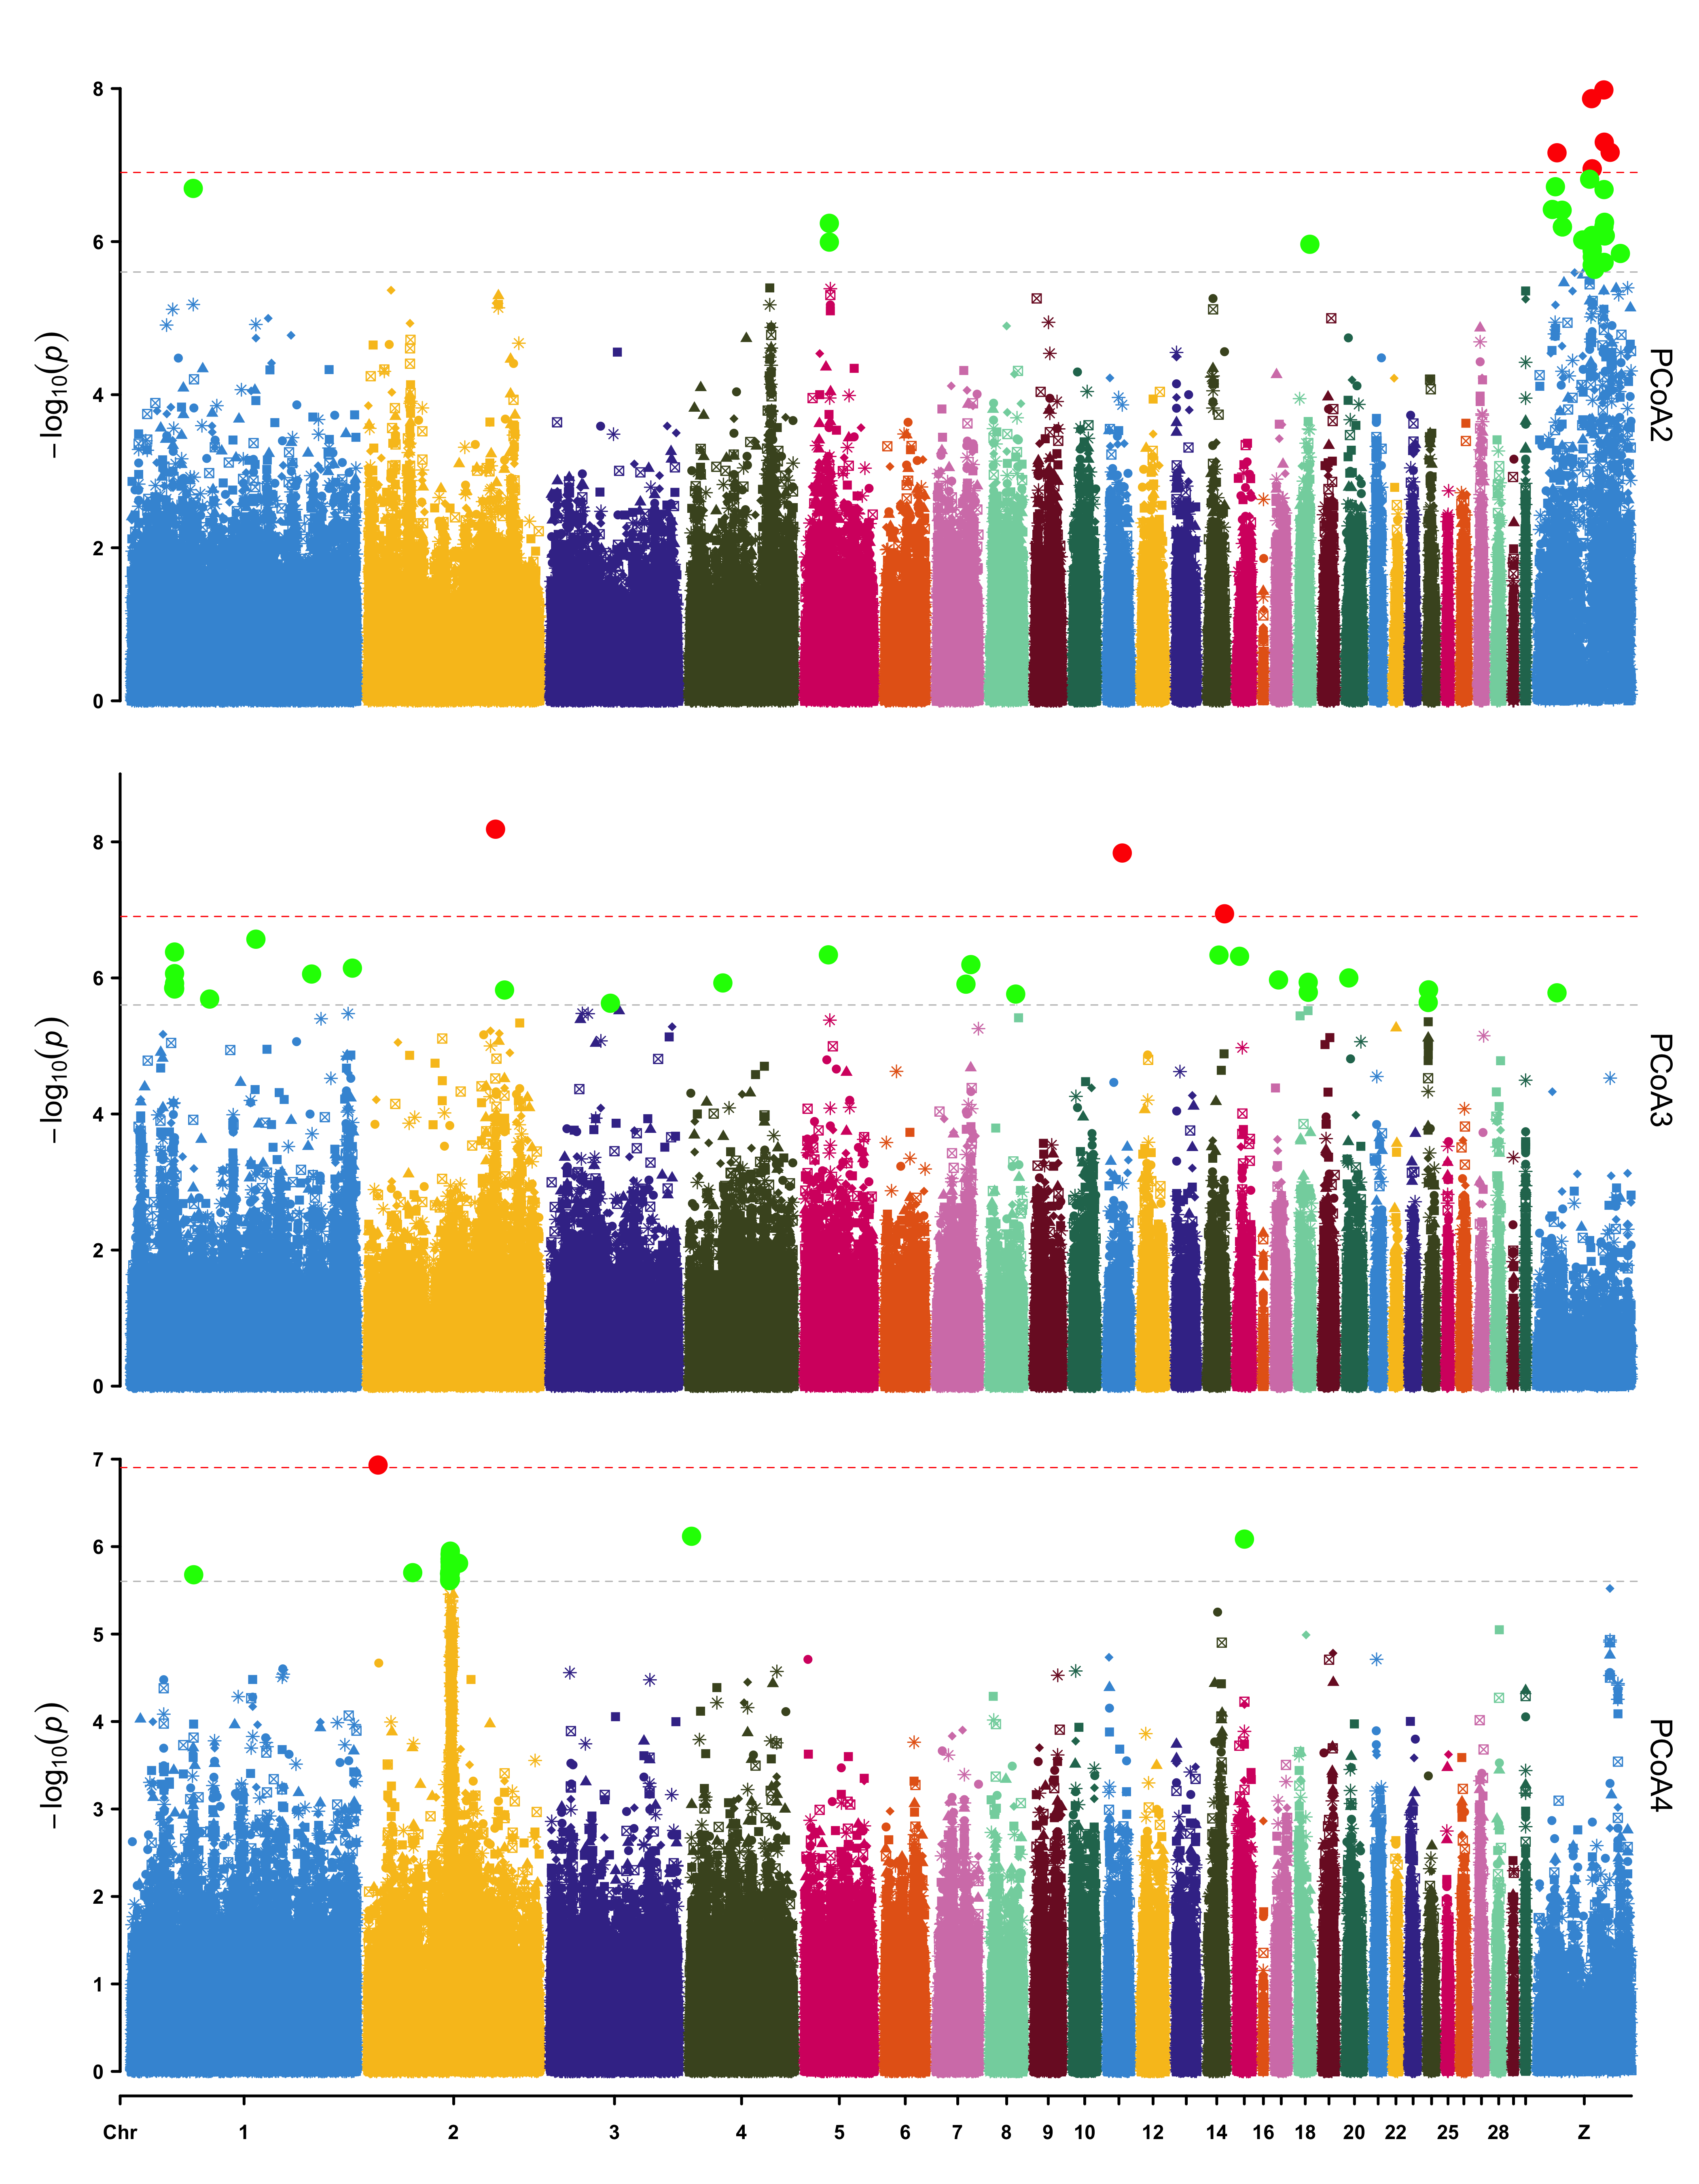


Figure 6 Manhattan plots display the GWAS results for beta-diversity (PCoA axes) in Cobb400 using the imputed 600K HD arrays. Genomic location is plotted against – log10(P) in the Manhattan plot. Genome-wide (P < 0.05) and suggestive genome-wide thresholds are shown as red and grey lines, respectively.


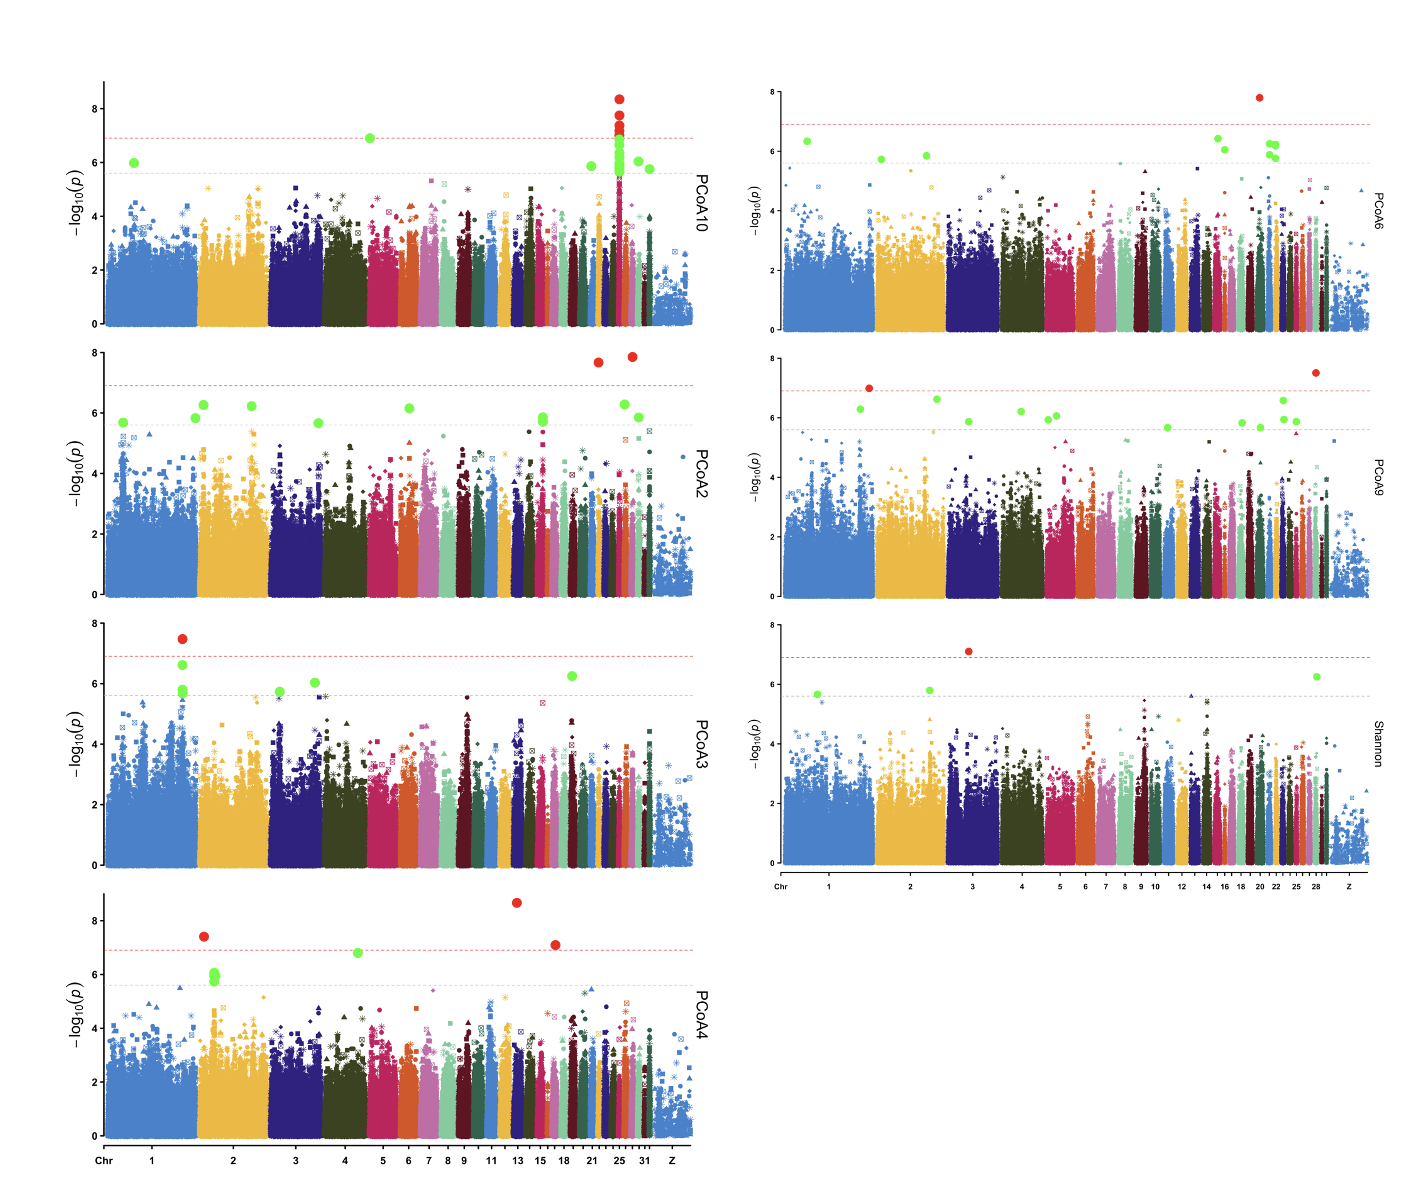


Figure 7 Manhattan plots display the GWAS results for alpha- (Shannon index) and beta-diversity (PCoA axes) in Kadaknath using the imputed 600K HD arrays. Genomic location is plotted against – log10(*P*) in the Manhattan plot. Genome-wide (*P* < 0.05) and suggestive genome-wide thresholds are shown as red and grey lines, respectively.


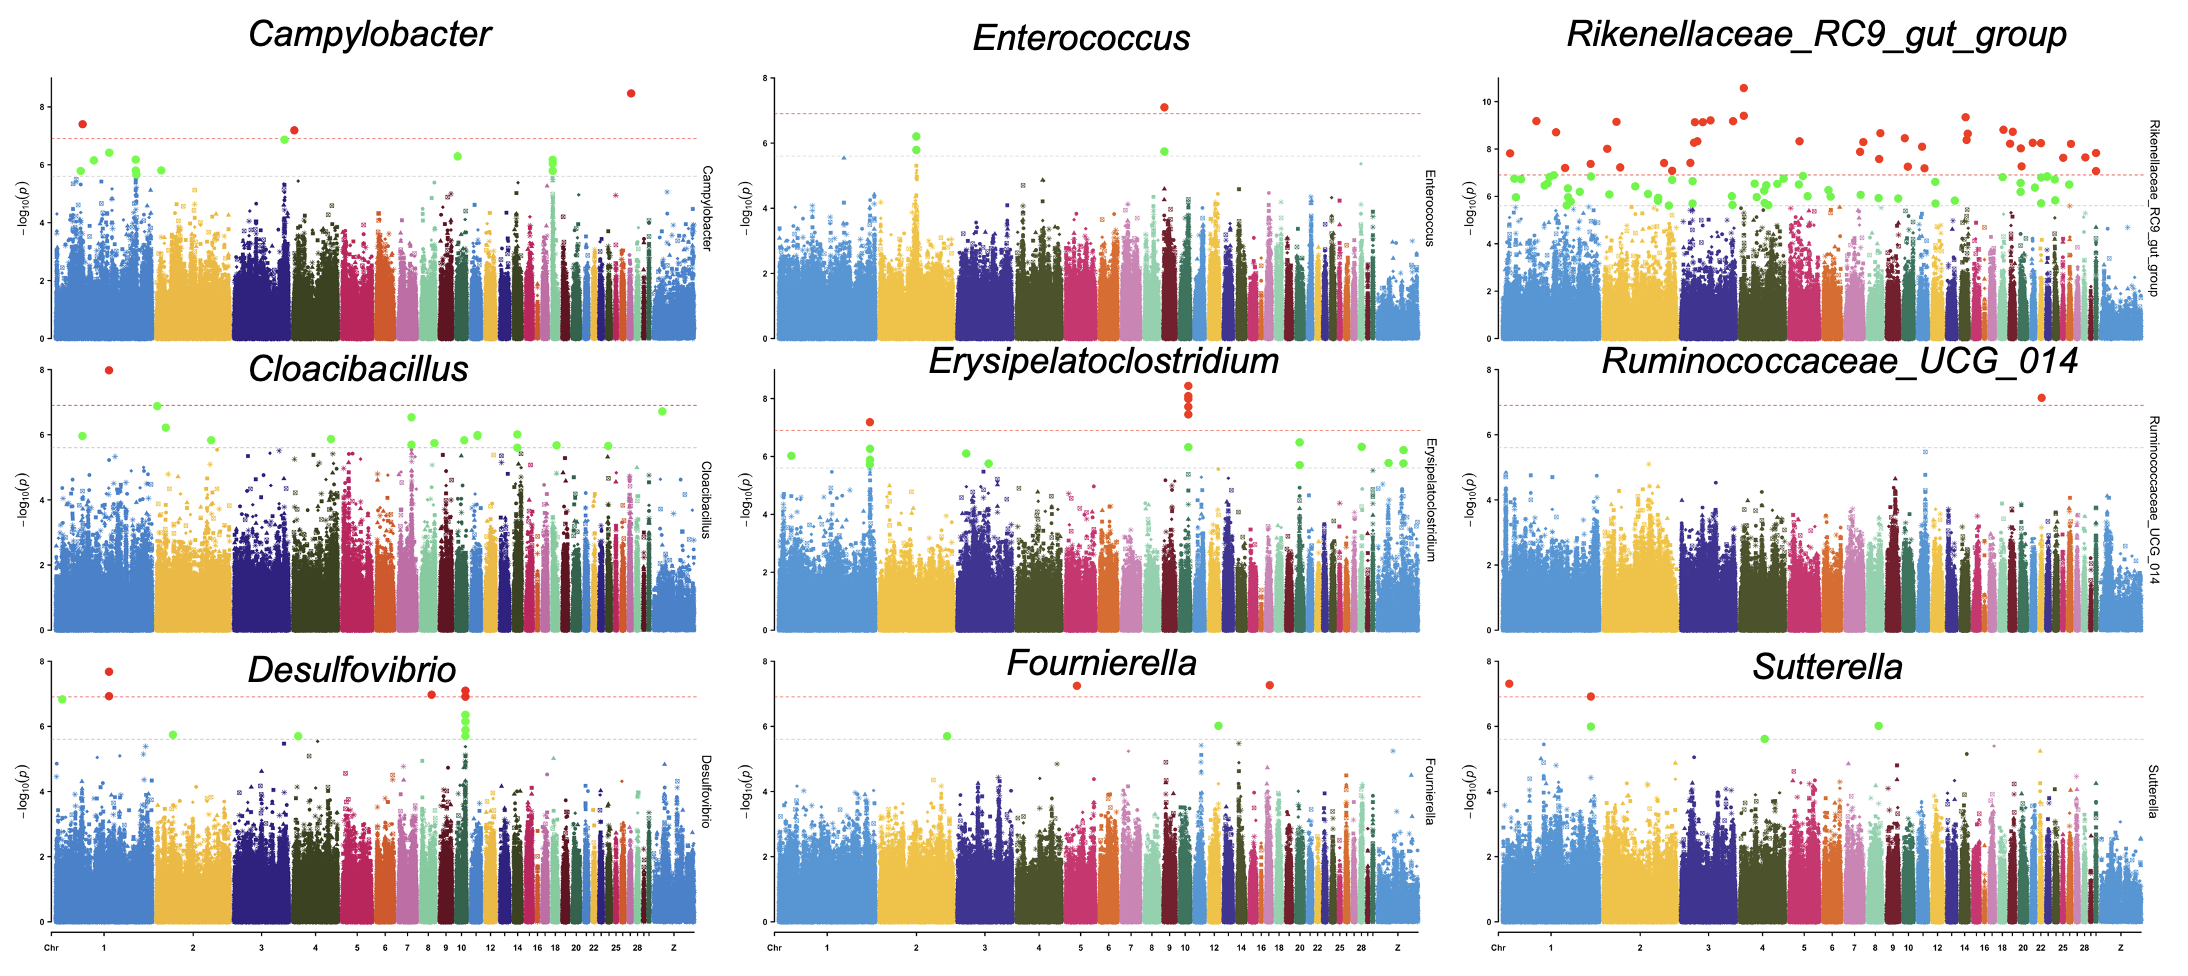


Figure 8 Manhattan plots display the GWAS results for significant SNP-based heritable phenotypes of caecal bacterial genera in Cobb400 using the imputed 600K HD arrays. Genomic location is plotted against – log10(P) in the Manhattan plot. Genome-wide (P < 0.05) and suggestive genome-wide thresholds are shown as red and grey lines, respectively.


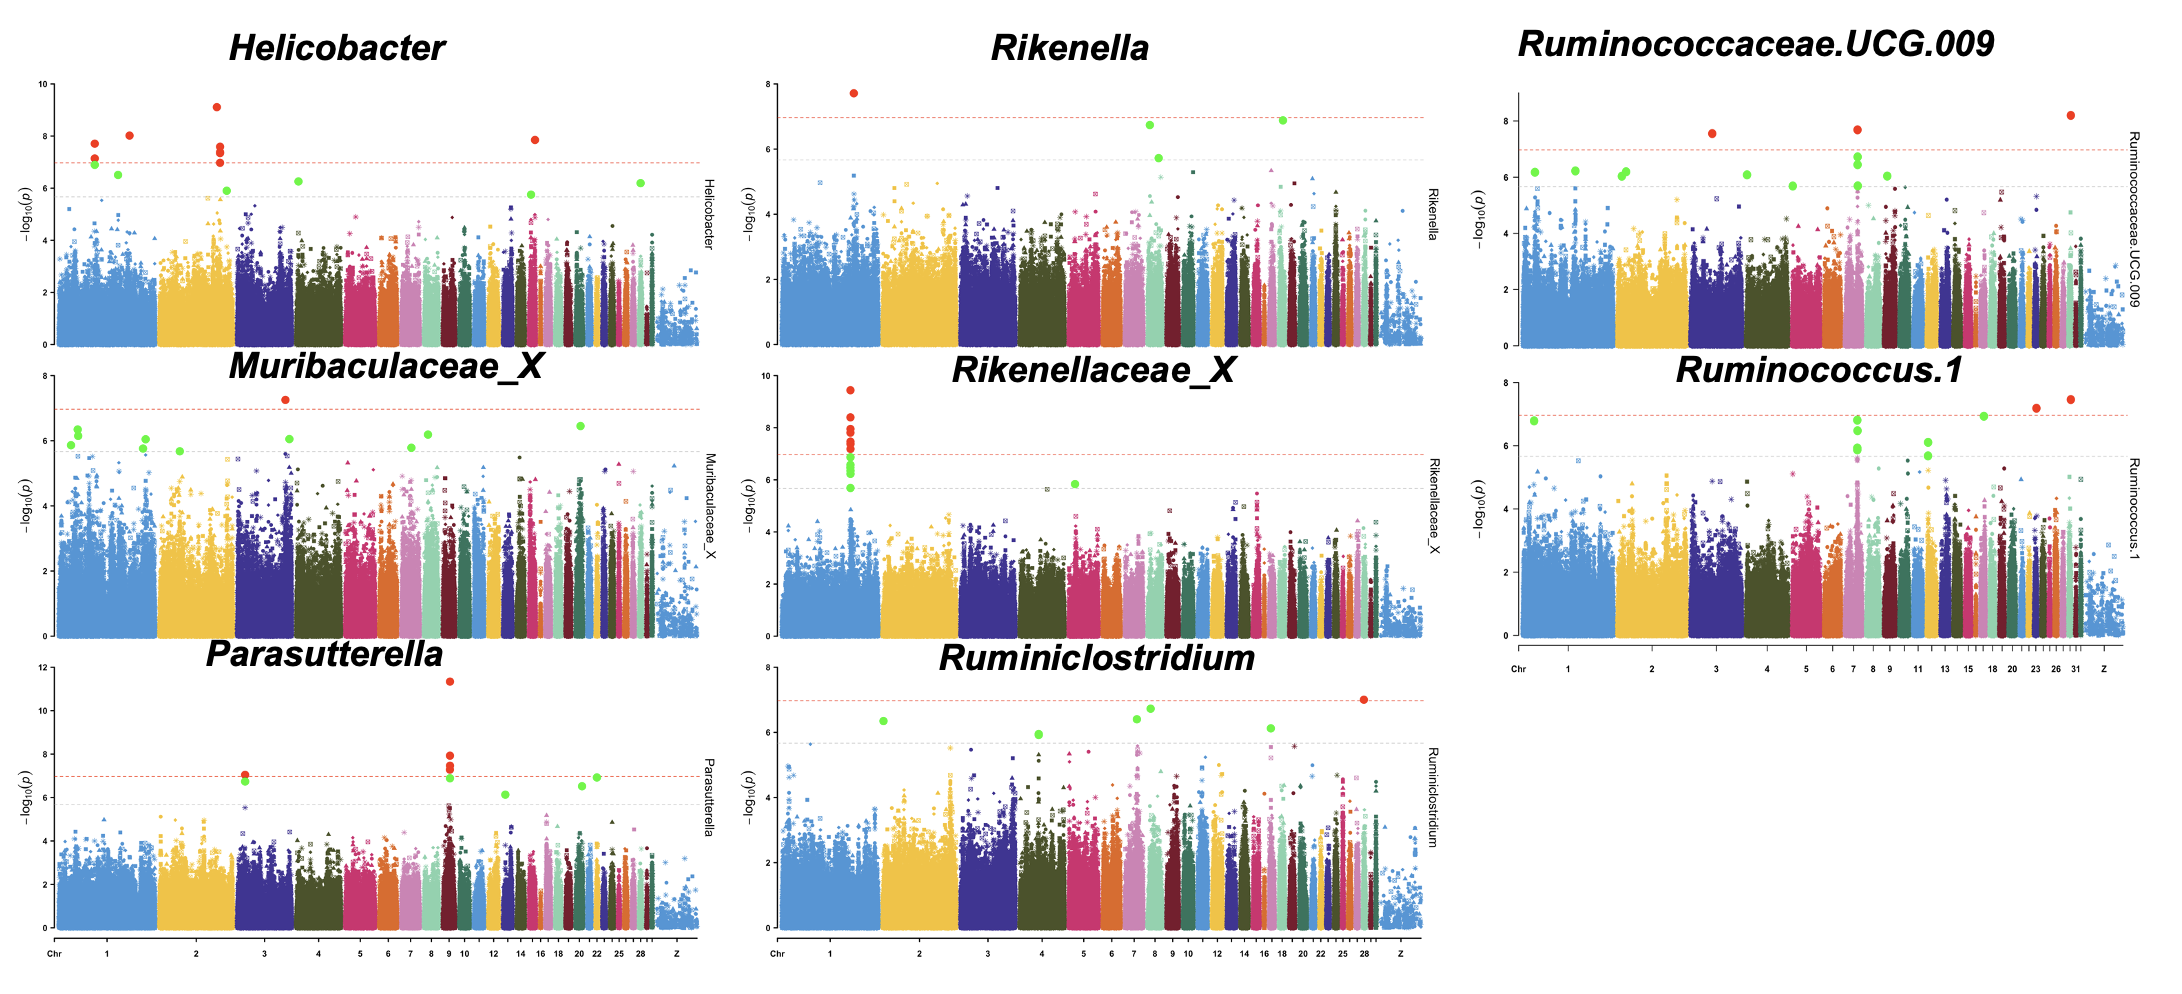

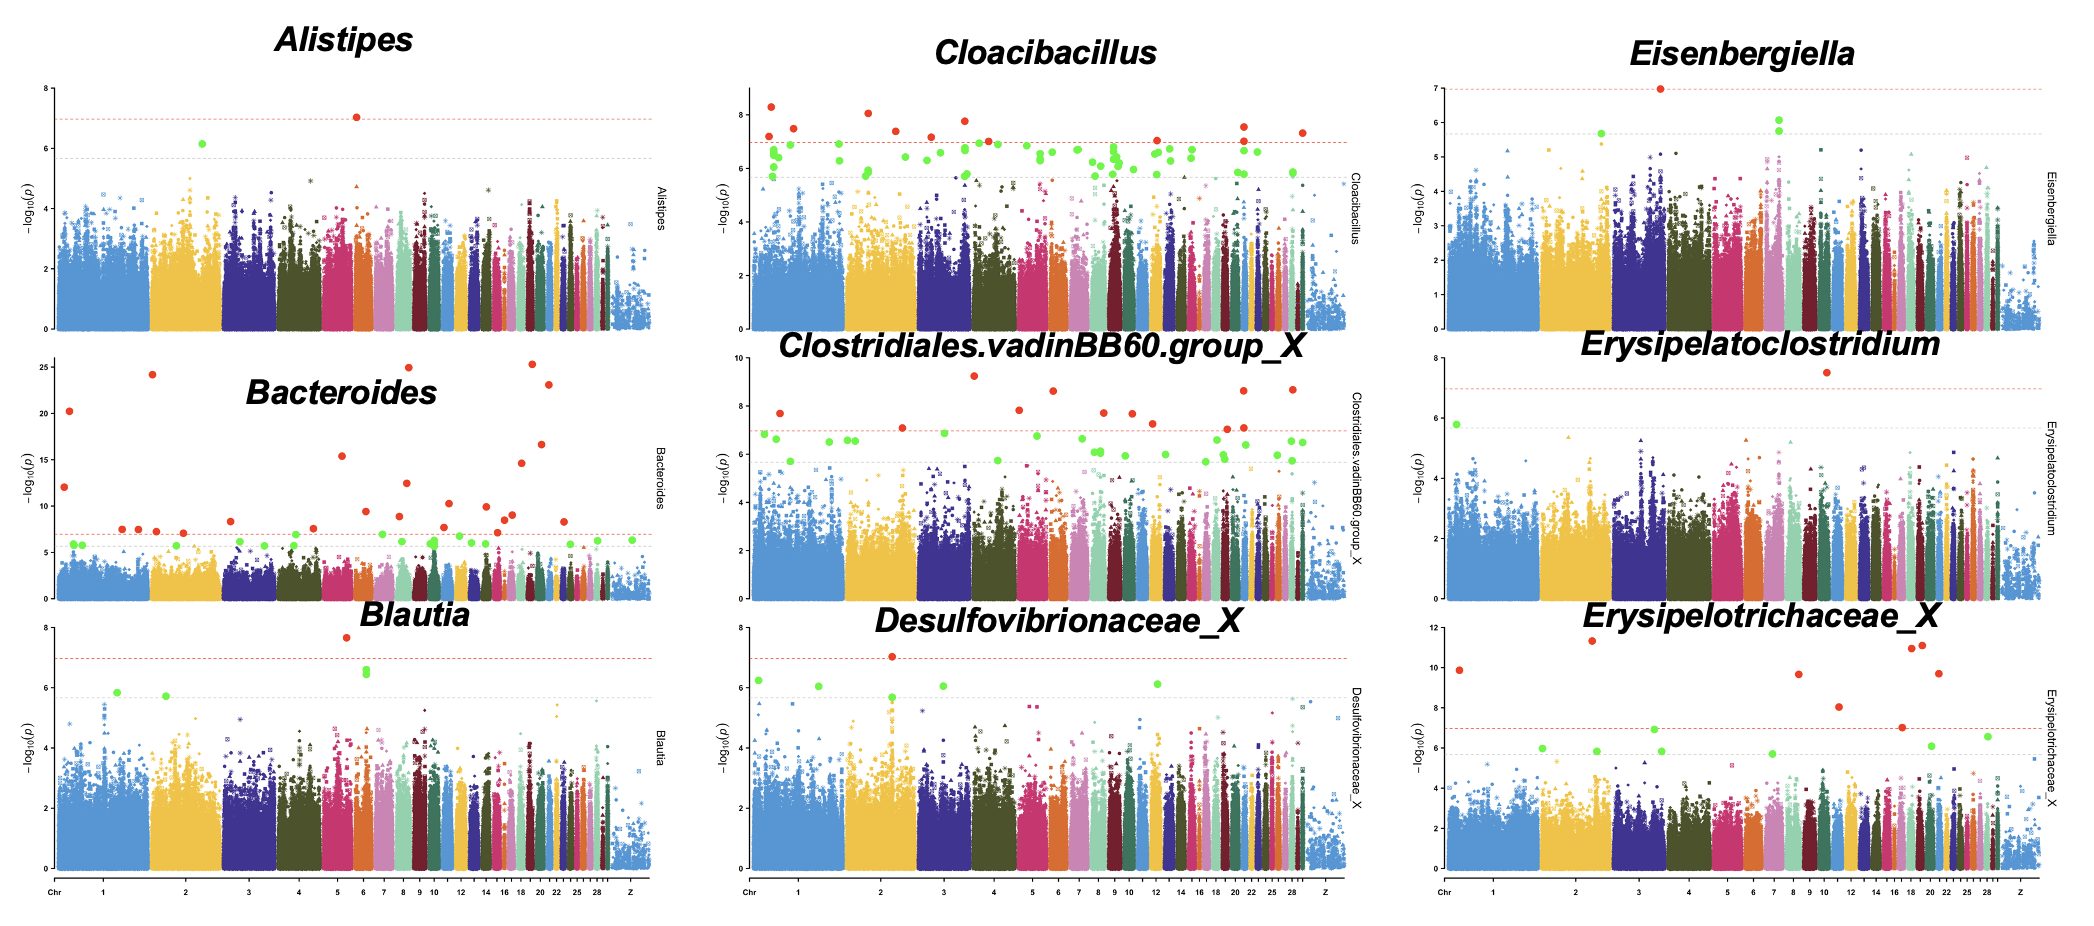


Figure 9 Manhattan plots display the GWAS results for significant SNP-based heritable phenotypes of caecal bacterial genera in Kadaknath using the imputed 600K (B) HD arrays. Genomic location is plotted against – log10(P) in the Manhattan plot. Genome-wide (P < 0.05) and suggestive genome-wide thresholds are shown as red and grey lines, respectively.


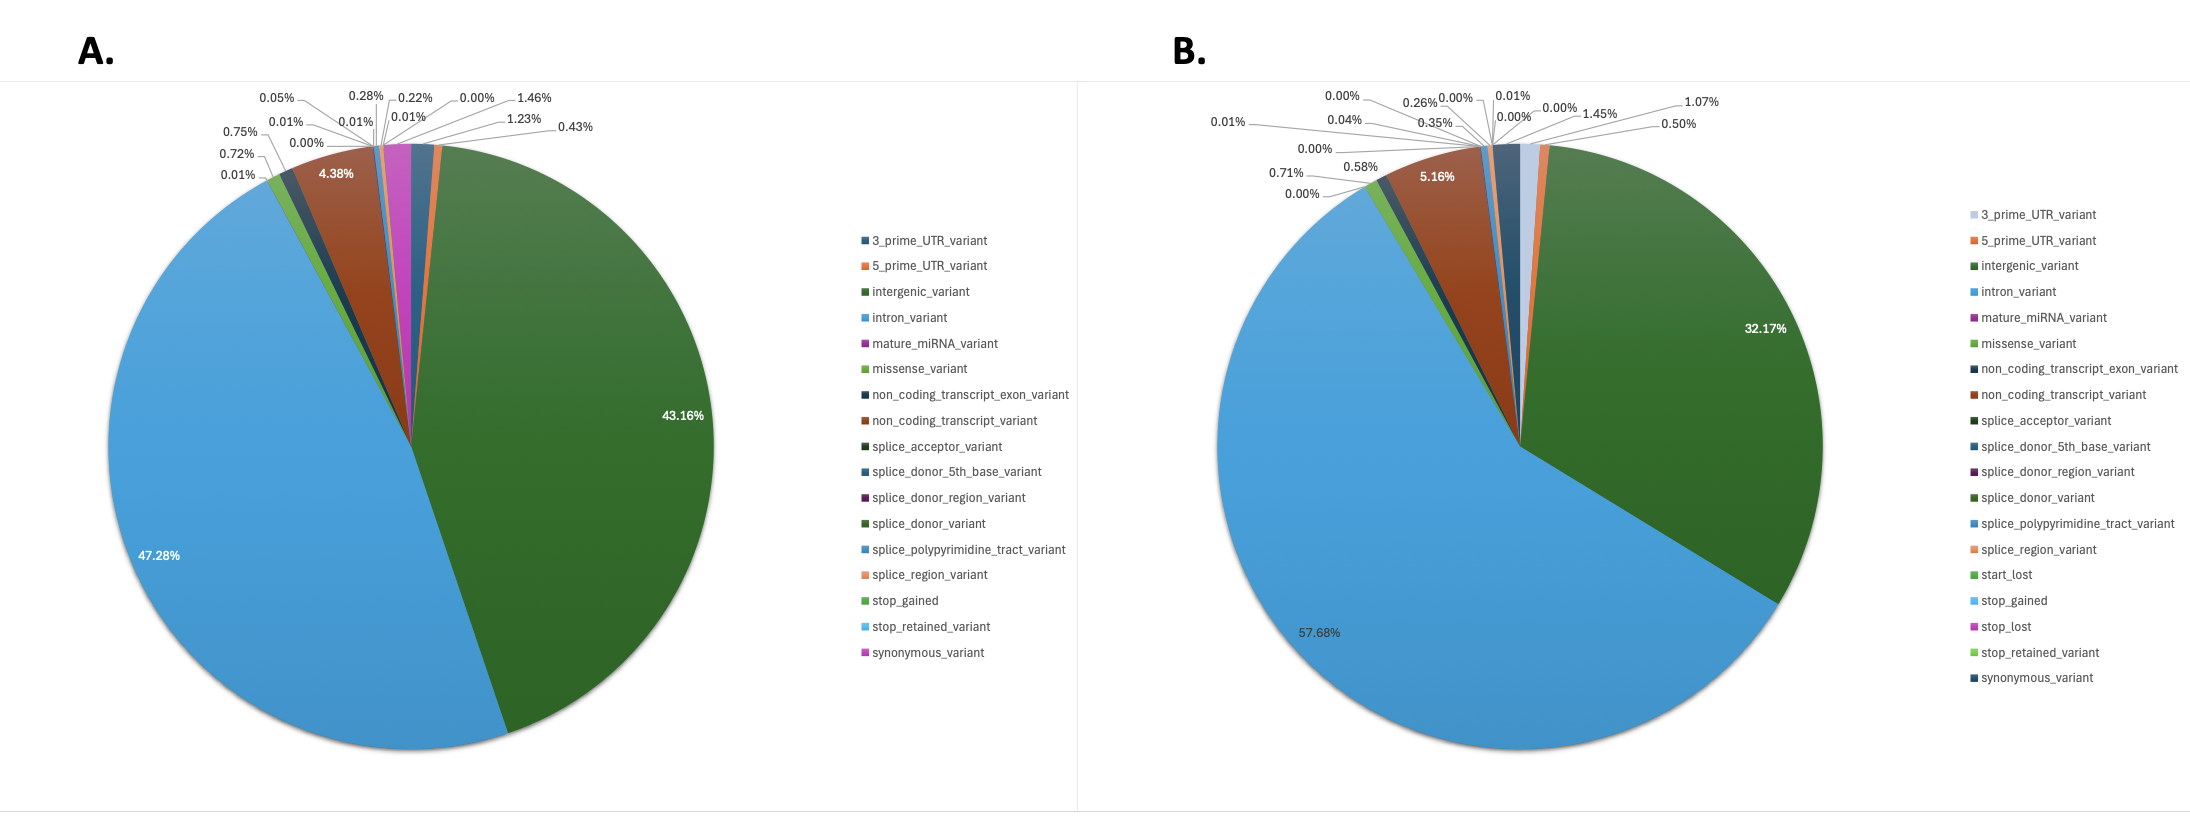


Figure 10 Pie Chart of consequence of VEP analysis of WGS in both Cobb400 (A) and Kadaknath (B).

Figure 11 KEGG enriched pathways of the genes linked to significant SNPs associated with beta-diversity of caecal microbiota in Cobb400 (Cobb) and Kadaknath chickens.

Figure 12 KEGG enriched pathways of the genes linked to significant SNPs associated with caecal genera in Cobb400 (Cobb) chickens.

Figure 13 KEGG enriched pathways of the genes linked to significant SNPs associated with caecal genera in Kadaknath chickens.

Table 2 The overall prevalence and relative abundance (with standard error; se) of the genera selected for GWAS analysis. SNP-based heritability is shown, with se and P-values in Cobb400 and Kadaknath chickens estimated by GCTA (Phenotype types: B = binary; C = continuous).

|  |  | Prevalence | Relative abundance, % | | | | SNP-based Heritability | | | | | |
| --- | --- | --- | --- | --- | --- | --- | --- | --- | --- | --- | --- | --- |
|  |  | Cobb400 | | Kadaknath | | Cobb400 | | | Kadaknath | | |
| Type of phenotypes | Traits | Relative abundance, % | s.e | Relative abundance, % | s.e | *h*2 (pve) | se | *P*-Value | *h*2 (pve) | se | *P*-Value |
| B | *Akkermansia* | 0.97 | 2.10 | 0.35 | 0.82 | 0.27 | 0.57 | 0.14 | <0.01 | 0.09 | 0.10 | 0.07 |
| C | *Alistipes* | 0.43 | 4.27 | 0.31 | 6.47 | 0.59 | 0.46 | 0.18 | <0.01 | 0.51 | 0.15 | <0.01 |
| B | *Anaerostipes* | 0.46 | 0.14 | 0.02 | 0.17 | 0.04 | 0.19 | 0.06 | 0.03 | 0.15 | 0.11 | 0.01 |
| B | *Bacillus* | 0.76 | 0.18 | 0.03 | 0.12 | 0.01 | 0.00 | 0.17 | 0.50 | 0.00 | 0.09 | 0.50 |
| C | *Bacteroides* | 0.42 | 13.04 | 0.58 | 12.41 | 0.74 | 0.25 | 0.19 | 0.07 | 0.28 | 0.05 | <0.01 |
| B | *Barnesiella* | 0.97 | 0.92 | 0.19 | 1.42 | 0.39 | 0.36 | 0.16 | 0.01 | 0.22 | 0.17 | 0.12 |
| B | *Barnesiellaceae_X* | 0.84 | 0.17 | 0.02 | 0.25 | 0.03 | 0.10 | 0.15 | 0.21 | 0.54 | 0.17 | <0.01 |
| B | *Bilophila* | 0.34 | 0.27 | 0.03 | 0.25 | 0.02 | 0.13 | 0.15 | 0.13 | 0.16 | 0.01 | 0.01 |
| C | *Blautia* | 0.69 | 0.53 | 0.06 | 0.58 | 0.05 | 0.17 | 0.05 | 0.04 | 0.21 | 0.03 | <0.01 |
| C | *Butyricicoccus* | 0.49 | 0.93 | 0.08 | 0.57 | 0.06 | 0.17 | 0.03 | 0.02 | 0.05 | 0.10 | 0.28 |
| B | *Butyricimonas* | 0.94 | 0.29 | 0.04 | 0.20 | 0.02 | 0.23 | 0.07 | 0.06 | 0.53 | 0.15 | <0.01 |
| B | *Campylobacter* | 0.56 | 0.90 | 0.14 | 0.68 | 0.21 | 0.16 | 0.03 | 0.02 | 0.17 | 0.02 | 0.01 |
| C | *Christensenellaceae.R.7.group* | 0.92 | 0.87 | 0.07 | 0.57 | 0.05 | 0.00 | 0.08 | 0.50 | 0.41 | 0.16 | <0.01 |
| B | *Cloacibacillus* | 0.80 | 2.62 | 0.26 | 1.09 | 0.16 | 0.39 | 0.17 | 0.01 | 0.21 | 0.02 | <0.01 |
| C | *Clostridiales.vadinBB60.group_X* | 0.55 | 5.70 | 0.25 | 5.09 | 0.24 | 0.07 | 0.11 | 0.17 | 0.17 | 0.02 | <0.01 |
| C | *Coprobacter* | 0.37 | 0.69 | 0.06 | 0.44 | 0.05 | 0.36 | 0.16 | <0.01 | 0.34 | 0.16 | <0.01 |
| B | *Defluviitaleaceae.UCG.011* | 0.88 | 0.09 | 0.01 | 0.12 | 0.01 | 0.01 | 0.12 | 0.46 | 0.21 | 0.04 | 0.01 |
| B | *Desulfovibrio* | 0.49 | 0.58 | 0.06 | 0.33 | 0.04 | 0.28 | 0.05 | <0.01 | 0.21 | 0.04 | <0.01 |
| B | *Desulfovibrionaceae_X* | 0.59 | 0.12 | 0.02 | 0.08 | 0.01 | 0.21 | 0.06 | 0.04 | 0.49 | 0.18 | <0.01 |
| B | *DTU014_X_X* | 0.76 | 0.13 | 0.02 | 0.07 | 0.01 | 0.01 | 0.09 | 0.43 | 0.16 | 0.01 | 0.01 |
| B | *DTU089* | 0.55 | 0.14 | 0.02 | 0.17 | 0.02 | 0.00 | 0.17 | 0.50 | 0.02 | 0.08 | 0.42 |
| C | *Eisenbergiella* | 0.39 | 0.80 | 0.11 | 0.73 | 0.05 | 0.01 | 0.13 | 0.48 | 0.17 | 0.03 | 0.01 |
| B | *Enterococcus* | 0.30 | 0.19 | 0.04 | 0.34 | 0.09 | 0.61 | 0.14 | <0.01 | 0.17 | 0.03 | 0.03 |
| C | *Erysipelatoclostridium* | 0.33 | 0.29 | 0.03 | 0.49 | 0.04 | 0.19 | 0.03 | <0.01 | 0.36 | 0.15 | <0.01 |
| B | *Erysipelotrichaceae_X* | 0.91 | 0.07 | 0.01 | 0.15 | 0.02 | 0.00 | 0.12 | 0.50 | 0.27 | 0.05 | <0.01 |
| B | *Escherichia.Shigella* | 0.46 | 0.92 | 0.15 | 0.78 | 0.18 | 0.00 | 0.19 | 0.50 | 0.08 | 0.09 | 0.08 |
| C | *Faecalibacterium* | 0.35 | 5.56 | 0.33 | 9.23 | 0.49 | 0.24 | 0.06 | 0.03 | 0.00 | 0.09 | 0.50 |
| B | *Flavobacteriales_X_X* | 0.47 | 0.33 | 0.03 | 0.14 | 0.02 | 0.67 | 0.13 | <0.01 | 0.42 | 0.18 | <0.01 |
| B | *Flavonifractor* | 0.39 | 0.06 | 0.01 | 0.06 | 0.01 | 0.10 | 0.14 | 0.15 | 0.00 | 0.08 | 0.50 |
| B | *Fournierella* | 0.32 | 0.44 | 0.10 | 0.39 | 0.05 | 0.33 | 0.13 | <0.01 | 0.29 | 0.05 | <0.01 |
| C | *Gastranaerophilales_X_X* | 0.40 | 2.90 | 0.18 | 2.45 | 0.16 | 0.41 | 0.18 | 0.01 | 0.14 | 0.10 | 0.08 |
| C | *GCA.900066575* | 0.96 | 0.66 | 0.04 | 0.87 | 0.05 | 0.07 | 0.15 | 0.31 | 0.00 | 0.07 | 0.50 |
| C | *Helicobacter* | 0.49 | 2.07 | 0.25 | 1.70 | 0.18 | 0.28 | 0.06 | <0.01 | 0.36 | 0.15 | <0.01 |
| C | *Lachnoclostridium* | 0.96 | 1.97 | 0.10 | 1.78 | 0.07 | 0.10 | 0.01 | 0.05 | 0.00 | 0.15 | 0.50 |
| C | *Lachnospiraceae_X* | 0.35 | 4.73 | 0.17 | 4.59 | 0.18 | 0.00 | 0.09 | 0.50 | 0.00 | 0.11 | 0.50 |
| C | *Lactobacillus* | 0.92 | 2.47 | 0.23 | 1.95 | 0.16 | 0.30 | 0.19 | 0.09 | 0.22 | 0.05 | 0.01 |
| B | *Megamonas* | 0.45 | 1.70 | 0.27 | 3.26 | 0.42 | 0.10 | 0.13 | 0.13 | 0.46 | 0.15 | <0.01 |
| B | *Methanocorpusculum* | 0.51 | 0.18 | 0.02 | 0.08 | 0.01 | 0.11 | 0.01 | 0.05 | 0.26 | 0.07 | 0.01 |
| B | *Mollicutes.RF39_X_X* | 0.59 | 0.02 | 0.00 | 0.05 | 0.01 | 0.00 | 0.20 | 0.50 | 0.03 | 0.10 | 0.41 |
| B | *Muribaculaceae_X* | 0.45 | 0.44 | 0.09 | 0.50 | 0.12 | 0.09 | 0.14 | 0.17 | 0.12 | 0.01 | 0.03 |
| C | *Negativibacillus* | 0.97 | 0.49 | 0.06 | 0.56 | 0.03 | 0.22 | 0.19 | 0.15 | 0.25 | 0.04 | <0.01 |
| B | *Odoribacter* | 0.81 | 0.56 | 0.13 | 0.27 | 0.09 | 0.00 | 0.10 | 0.50 | 0.27 | 0.19 | 0.22 |
| C | *Oscillibacter* | 0.89 | 0.46 | 0.03 | 0.62 | 0.06 | 0.21 | 0.19 | 0.15 | 0.41 | 0.18 | 0.01 |
| C | *Parabacteroides* | 0.63 | 0.94 | 0.08 | 0.71 | 0.06 | 0.22 | 0.18 | 0.10 | 0.02 | 0.10 | 0.41 |
| C | *Parasutterella* | 0.34 | 0.88 | 0.09 | 0.67 | 0.07 | 0.06 | 0.14 | 0.31 | 0.30 | 0.13 | <0.01 |
| B | *Peptococcaceae_X* | 0.41 | 0.10 | 0.01 | 0.06 | 0.01 | 0.04 | 0.13 | 0.35 | 0.18 | 0.03 | 0.01 |
| C | *Phascolarctobacterium* | 0.79 | 3.65 | 0.18 | 2.84 | 0.19 | 0.11 | 0.15 | 0.18 | 0.43 | 0.18 | <0.01 |
| C | *Rhodospirillales_X_X* | 0.83 | 0.84 | 0.06 | 0.77 | 0.05 | 0.00 | 0.14 | 0.50 | 0.24 | 0.07 | 0.03 |
| B | *Rikenella* | 0.32 | 0.19 | 0.03 | 0.22 | 0.03 | 0.08 | 0.10 | 0.10 | 0.36 | 0.14 | <0.01 |
| B | *Rikenellaceae_X* | 0.73 | 0.14 | 0.02 | 0.58 | 0.10 | 0.26 | 0.08 | 0.03 | 0.45 | 0.18 | <0.01 |
| B | *Rikenellaceae.RC9.gut.group* | 0.44 | 1.29 | 0.24 | 1.07 | 0.17 | 0.32 | 0.15 | 0.01 | 0.16 | 0.03 | 0.02 |
| C | *Ruminiclostridium* | 0.83 | 0.83 | 0.06 | 0.91 | 0.06 | 0.03 | 0.14 | 0.42 | 0.35 | 0.17 | <0.01 |
| C | *Ruminiclostridium.5* | 0.66 | 0.62 | 0.04 | 0.87 | 0.06 | 0.05 | 0.16 | 0.37 | 0.12 | 0.14 | 0.17 |
| C | *Ruminiclostridium.9* | 0.51 | 1.72 | 0.10 | 1.61 | 0.06 | 0.06 | 0.13 | 0.27 | 0.11 | 0.11 | 0.07 |
| C | *Ruminococcaceae_X* | 0.77 | 5.72 | 0.26 | 5.86 | 0.24 | 0.00 | 0.20 | 0.50 | 0.24 | 0.05 | <0.01 |
| C | *Ruminococcaceae.NK4A214.group* | 0.86 | 1.07 | 0.09 | 0.57 | 0.04 | 0.07 | 0.10 | 0.15 | 0.27 | 0.05 | <0.01 |
| C | *Ruminococcaceae.UCG.005* | 0.81 | 1.76 | 0.13 | 1.61 | 0.11 | 0.24 | 0.06 | 0.05 | 0.41 | 0.18 | <0.01 |
| B | *Ruminococcaceae.UCG.009* | 0.31 | 0.14 | 0.02 | 0.10 | 0.01 | 0.00 | 0.16 | 0.50 | 0.26 | 0.12 | <0.01 |
| C | *Ruminococcaceae.UCG.010* | 0.61 | 0.37 | 0.04 | 0.27 | 0.02 | 0.00 | 0.19 | 0.50 | 0.29 | 0.06 | <0.01 |
| B | *Ruminococcaceae.UCG.013* | 0.74 | 0.17 | 0.02 | 0.15 | 0.01 | 0.33 | 0.07 | 0.03 | 0.13 | 0.02 | 0.05 |
| C | *Ruminococcaceae.UCG.014* | 0.69 | 2.63 | 0.14 | 2.32 | 0.11 | 0.26 | 0.08 | 0.04 | 0.00 | 0.13 | 0.50 |
| B | *Ruminococcus.1* | 0.32 | 0.28 | 0.04 | 0.27 | 0.02 | 0.02 | 0.10 | 0.42 | 0.24 | 0.04 | <0.01 |
| B | *Ruminococcus.2* | 0.62 | 0.16 | 0.03 | 0.14 | 0.02 | 0.11 | 0.05 | 0.16 | 0.21 | 0.16 | 0.06 |
| B | *Shuttleworthia* | 0.87 | 0.37 | 0.03 | 0.45 | 0.10 | 0.00 | 0.15 | 0.50 | 0.04 | 0.08 | 0.28 |
| C | *Subdoligranulum* | 0.62 | 0.89 | 0.08 | 0.58 | 0.04 | 0.27 | 0.21 | 0.24 | 0.15 | 0.02 | 0.02 |
| B | *Sutterella* | 0.65 | 0.34 | 0.04 | 0.33 | 0.04 | 0.29 | 0.04 | <0.01 | 0.11 | 0.13 | 0.12 |
| C | *Tyzzerella* | 0.81 | 0.66 | 0.06 | 0.52 | 0.04 | 0.15 | 0.05 | 0.09 | 0.13 | 0.02 | 0.04 |
| B | *Tyzzerella.3* | 0.42 | 0.05 | 0.01 | 0.07 | 0.01 | 0.00 | 0.18 | 0.50 | 0.01 | 0.07 | 0.41 |
| B | *vadinBE97_X* | 0.32 | 0.26 | 0.04 | 0.13 | 0.01 | 0.00 | 0.18 | 0.50 | 0.30 | 0.10 | <0.01 |
| B | *Victivallaceae_X* | 0.51 | 0.28 | 0.03 | 0.19 | 0.02 | 0.16 | 0.15 | 0.11 | 0.25 | 0.07 | 0.05 |
| C | *Victivallis* | 0.53 | 0.22 | 0.04 | 0.22 | 0.03 | 0.00 | 0.10 | 0.49 | 0.00 | 0.11 | 0.50 |
| C | *X.Eubacterium..coprostanoligenes.group* | 0.42 | 0.45 | 0.03 | 0.92 | 0.09 | 0.00 | 0.19 | 0.50 | 0.04 | 0.10 | 0.33 |
| B | *X.Eubacterium..hallii.group* | 0.72 | 0.13 | 0.02 | 0.11 | 0.01 | 0.07 | 0.12 | 0.20 | 0.11 | 0.01 | 0.05 |
| C | *X.Ruminococcus..torques.group* | 0.31 | 4.70 | 0.21 | 5.51 | 0.23 | 0.08 | 0.16 | 0.32 | 0.00 | 0.11 | 0.50 |

Table 3. Genera differing significantly between Cobb400 and Kadaknath as per DESeq2 and included in GWAS1.

| kingdom | phylum | class | order | family | genus | baseMean | log2FoldChange | padj |
| --- | --- | --- | --- | --- | --- | --- | --- | --- |
| Bacteria | Firmicutes | Negativicutes | Selenomonadales | *Veillonellaceae* | *Megamonas* | 2.75 | 0.92 | 0.0137 |
| Bacteria | Firmicutes | Clostridia | Clostridiales | *Ruminococcaceae* | *Faecalibacterium* | 7.83 | 0.77 | <0.0001 |
| Bacteria | Epsilonbacteraeota | Campylobacteria | Campylobacterales | *Helicobacteraceae* | *Helicobacter* | 1.91 | 0.74 | 0.0071 |
| Bacteria | Firmicutes | Clostridia | Clostridiales | *Ruminococcaceae* | *Oscillibacter* | 0.50 | 0.48 | 0.0441 |
| Bacteria | Firmicutes | Erysipelotrichia | Erysipelotrichales | *Erysipelotrichaceae* | *Erysipelatoclostridium* | 0.39 | -0.73 | 0.0107 |
| Bacteria | Firmicutes | Negativicutes | Selenomonadales | *Acidaminococcaceae* | *Phascolarctobacterium* | 3.39 | -0.37 | 0.0407 |
| Bacteria | Firmicutes | Bacilli | Lactobacillales | *Lactobacillaceae* | *Lactobacillus* | 2.26 | -0.56 | 0.0057 |
| Bacteria | Synergistetes | Synergistia | Synergistales | *Synergistaceae* | *Cloacibacillus* | 1.95 | -0.84 | 0.0223 |
| Bacteria | Verrucomicrobia | Verrucomicrobiae | Verrucomicrobiales | *Akkermansiaceae* | *Akkermansia* | 1.56 | -1.82 | 0.0018 |

Table 4 Genome-wide significant SNPs associated with the alpha and beta diversity of caecal microbiota in Cobb400.

| Trait | dbSNP | Chr | Positiona | *P*-value | EAFb | Minor/major allele | Effect size (SE)c | Closet_genesd |
| --- | --- | --- | --- | --- | --- | --- | --- | --- |
| PCoA2 | rs316331412 | Z | 58109849 | 1.0426E-08 | 0.214 | C/T | -0.496(0.084) | *KIAA0825* |
| PCoA2 | rs316960238 | Z | 47340559 | 1.3555E-08 | 0.459 | C/A | -0.365(0.062) | *MAN2A1* |
| PCoA2 | rs314736117 | Z | 58456296 | 5.0231E-08 | 0.197 | G/A | -0.497(0.089) | *FAM172A* |
| PCoA2 | rs315683746 | Z | 63580769 | 6.8099E-08 | 0.142 | A/T | -0.528(0.095) | *ATG10* |
| PCoA2 | rs14752343 | Z | 17221475 | 6.9052E-08 | 0.118 | A/T | -0.634(0.115) | *ANKRD55* |
| PCoA2 | rs312519627 | Z | 47874847 | 1.1203E-07 | 0.443 | T/C | -0.353(0.065) | *FBXL17* |
| PCoA2 | rs313969155 | Z | 47843213 | 1.1203E-07 | 0.443 | G/A | -0.353(0.065) | *FBXL17* |
| PCoA3 | --- | 2 | 110390949 | 6.5103E-09 | 0.375 | G/A | 0.495(0.083) | *MRPL15* |
| PCoA3 | --- | 11 | 12449213 | 1.4582E-08 | 0.189 | C/T | -0.607(0.104) | *CDH11* |
| PCoA3 | --- | 14 | 14636260 | 1.1404E-07 | 0.331 | G/A | -0.387(0.071) | *ENSGALT00000057108* |
| PCoA4 | --- | 2 | 8757131 | 1.168E-07 | 0.124 | A/G | 0.734(0.135) | *DNAJB6* |

aPosition were derived from remapping to Galgal6 by using LiftOver remapping tool.

bThe effect allele frequency calculated using the data from each breed.

cLinear regression beta coefficient and standard error (SE) of the minor allele.

dThe closet genes were derived from the Ensemble by using the new position from Galgal6.

PCoA2, 3, and 4 are the first 2, 3, and 4 axis of beta diversity of caecal microbiota.

Table 5 Genome-wide significant SNPs associated with the alpha and beta diversity of caecal microbiota in Kadaknath.

| Trait | dbSNP | Chr | Positiona | *P*-value | EAFb | Minor/major allele | Effect size (SE)c | Closet_genesd |
| --- | --- | --- | --- | --- | --- | --- | --- | --- |
| PCoA10 | --- | 25 | 2307838 | 4.49E-09 | 0.186 | T/C | 0.596(0.098) | *COPA* |
| PCoA10 | --- | 25 | 2306849 | 1.78E-08 | 0.220 | T/G | 0.539(0.093) | *COPA* |
| PCoA10 | --- | 25 | 2306629 | 4.21E-08 | 0.221 | C/A | 0.532(0.094) | *COPA* |
| PCoA10 | --- | 25 | 2167691 | 6.68E-08 | 0.190 | A/G | 0.550(0.099) | *F-KER* |
| PCoA10 | --- | 25 | 2159506 | 9.74E-08 | 0.197 | C/T | 0.548(0.1) | *F-KER* |
| PCoA2 | --- | 27 | 5121354 | 1.41E-08 | 0.192 | G/T | 0.718(0.122) | *DCAF7* |
| PCoA2 | --- | 22 | 689363 | 2.14E-08 | 0.100 | C/A | 0.715(0.124) | *PPP2R2A* |
| PCoA3 | --- | 1 | 167269928 | 3.36E-08 | 0.173 | G/A | 0.674(0.118) | *ENSGALT00000049953* |
| PCoA4 | rs15679485 | 13 | 7493276 | 2.16E-09 | 0.311 | T/A | -0.513(0.083) | *CCNG1* |
| PCoA4 | --- | 2 | 8757131 | 3.92E-08 | 0.143 | A/G | -0.634(0.112) | *DNAJB6* |
| PCoA4 | --- | 17 | 6829375 | 8.02E-08 | 0.196 | A/G | 0.631(0.114) | *CFAP77* |
| PCoA6 | --- | 20 | 5969268 | 1.60E-08 | 0.064 | C/A | 0.982(0.168) | *SULF2* |
| PCoA9 | rs317996850 | 28 | 2138482 | 3.11E-08 | 0.095 | G/T | 0.871(0.153) | *DOT1L* |
| PCoA9 | --- | 1 | 188886410 | 1.03E-07 | 0.107 | G/T | 0.774(0.141) | *CHORDC1* |
| Shannon | --- | 3 | 46086416 | 7.89E-08 | 0.121 | G/A | -0.754(0.136) | *UTRN* |

aPosition were derived from remapping to Galgal6 by using LiftOver remapping tool.

bThe effect allele frequency calculated using the data from each breed.

cLinear regression beta coefficient and standard error (SE) of the minor allele.

dThe closet genes were derived from the Ensemble by using the new position from Galgal6.

PCoA 2, 3, 4, 6, 9 and 10 are the first 2, 3, 4, 6, 9 and 10 axis of beta diversity of caecal microbiota. Shannon is the alpha diversity index of caecal microbiota.

Table 6 Genome-wide significant SNPs associated with the heritable caecal genera in Cobb400.

| trait | dbSNP | Chr | Positiona | *P*-value | EAFb | Minor/major allele | Effect size (SE)c | Closest genesd |
| --- | --- | --- | --- | --- | --- | --- | --- | --- |
| *Campylobacter* | rs314783291 | 1 | 53848477 | 3.97E-08 | 0.295 | G/C | 0.221(0.039) | *POLR3B* |
| *Campylobacter* | --- | 27 | 6810316 | 3.42E-09 | 0.09 | C/T | 0.414(0.068) | *MLLT6* |
| *Campylobacter* | rs317261924 | 4 | 1646099 | 6.43E-08 | 0.197 | A/T | 0.238(0.043) | *APLN* |
| *Cloacibacillus* | --- | 1 | 109193389 | 1.05E-08 | 0.243 | A/G | 0.33(0.056) | *ETS2* |
| *Desulfovibrio* | --- | 1 | 109193389 | 2.10E-08 | 0.243 | A/G | 0.251(0.043) | *ETS2* |
| *Desulfovibrio* | --- | 10 | 18347715 | 7.99E-08 | 0.46 | C/T | -0.247(0.045) | *IGDCC3* |
| *Desulfovibrio* | --- | 8 | 21359735 | 1.07E-07 | 0.307 | C/T | 0.273(0.05) | *ZSWIM5* |
| *Desulfovibrio* | --- | 1 | 109197138 | 1.18E-07 | 0.268 | C/T | 0.226(0.042) | *ETS2* |
| *Desulfovibrio* | --- | 10 | 18334889 | 1.23E-07 | 0.46 | T/C | -0.241(0.044) | *IGDCC3* |
| *Enterococcus* | --- | 9 | 1234492 | 7.99E-08 | 0.146 | A/G | 0.265(0.048) | *NGEF* |
| *Erysipelatoclostridium* | --- | 10 | 16787954 | 3.65E-09 | 0.125 | A/G | 0.569(0.093) | *ARRDC4* |
| *Erysipelatoclostridium* | rs317618625 | 10 | 16791476 | 8.17E-09 | 0.124 | G/C | 0.559(0.094) | *ARRDC4* |
| *Erysipelatoclostridium* | --- | 10 | 16826267 | 1.03E-08 | 0.122 | T/C | 0.566(0.096) | *ARRDC4* |
| *Erysipelatoclostridium* | --- | 10 | 16810784 | 1.92E-08 | 0.12 | T/C | 0.566(0.098) | *ARRDC4* |
| *Erysipelatoclostridium* | --- | 10 | 16816916 | 3.54E-08 | 0.126 | C/A | 0.554(0.098) | *ARRDC4* |
| *Erysipelatoclostridium* | --- | 1 | 186023591 | 6.54E-08 | 0.161 | C/T | 0.455(0.082) | *CCDC82* |
| *Fournierella* | --- | 5 | 22338311 | 5.68E-08 | 0.053 | T/C | 0.433(0.078) | *TSPAN18* |
| *Fournierella* | rs312299864 | 17 | 6835139 | 5.44E-08 | 0.076 | T/C | 0.365(0.065) | *CFAP77* |
| *Rikenellaceae_RC9_gut_group* | rs313227007 | 4 | 6663045 | 3.95E-10 | 0.476 | G/A | -0.258(0.04) | *PCDH11X* |
| *Rikenellaceae_RC9_gut_group* | rs314107467 | 14 | 9822602 | 4.55E-10 | 0.17 | A/T | -0.37(0.057) | *GRIN2A* |
| *Rikenellaceae_RC9_gut_group* | rs316361063 | 3 | 59135829 | 6.18E-10 | 0.155 | A/T | -0.404(0.063) | *THEMIS* |
| *Rikenellaceae_RC9_gut_group* | --- | 1 | 67682281 | 6.63E-10 | 0.156 | C/T | -0.395(0.062) | *ITPR2* |
| *Rikenellaceae_RC9_gut_group* | --- | 3 | 104787142 | 6.68E-10 | 0.151 | G/A | -0.411(0.064) | *ASXL2* |
| *Rikenellaceae_RC9_gut_group* | --- | 2 | 25923729 | 7.12E-10 | 0.151 | G/A | -0.412(0.065) | *NDUFA4* |
| *Rikenellaceae_RC9_gut_group* | --- | 3 | 27335242 | 7.38E-10 | 0.167 | G/A | -0.393(0.062) | *PPP1CB* |
| *Rikenellaceae_RC9_gut_group* | rs317910367 | 3 | 43372945 | 7.38E-10 | 0.154 | T/A | -0.402(0.063) | *PDE10A* |
| *Rikenellaceae_RC9_gut_group* | --- | 18 | 7935196 | 1.54E-09 | 0.4 | T/G | 0.304(0.049) | *ENSGALG00000021395* |
| *Rikenellaceae_RC9_gut_group* | --- | 19 | 5897655 | 1.88E-09 | 0.153 | G/A | -0.394(0.063) | *KIAA0100* |
| *Rikenellaceae_RC9_gut_group* | --- | 1 | 109238223 | 1.96E-09 | 0.416 | A/C | 0.273(0.044) | *PSMG1* |
| *Rikenellaceae_RC9_gut_group* | rs316380604 | 8 | 24960408 | 2.14E-09 | 0.156 | A/T | -0.386(0.062) | *SLC1A7* |
| *Rikenellaceae_RC9_gut_group* | rs13781939 | 14 | 14226180 | 2.25E-09 | 0.158 | G/A | -0.387(0.063) | *AMDHD2* |
| *Rikenellaceae_RC9_gut_group* | --- | 10 | 2810012 | 3.50E-09 | 0.152 | G/A | -0.383(0.063) | *PPCDC* |
| *Rikenellaceae_RC9_gut_group* | rs317894008 | 14 | 11856287 | 4.17E-09 | 0.151 | A/T | -0.391(0.065) | *NA* |
| *Rikenellaceae_RC9_gut_group* | rs317543493 | 5 | 20490925 | 4.70E-09 | 0.16 | T/A | -0.384(0.063) | *NA* |
| *Rikenellaceae_RC9_gut_group* | --- | 3 | 32320377 | 4.72E-09 | 0.151 | A/G | -0.389(0.064) | *ENSGALG00000047357* |
| *Rikenellaceae_RC9_gut_group* | rs312949550 | 7 | 35878353 | 5.09E-09 | 0.151 | G/C | -0.39(0.065) | *KCNJ3* |
| *Rikenellaceae_RC9_gut_group* | --- | 3 | 25624886 | 5.41E-09 | 0.153 | C/T | -0.391(0.065) | *CAMKMT* |
| *Rikenellaceae_RC9_gut_group* | rs16178725 | 21 | 2234019 | 5.48E-09 | 0.153 | A/T | -0.383(0.064) | *ENSGALG00000023936* |
| *Rikenellaceae_RC9_gut_group* | rs313456337 | 22 | 2474748 | 5.65E-09 | 0.154 | T/A | -0.382(0.064) | *ERLIN2* |
| *Rikenellaceae_RC9_gut_group* | rs316506290 | 19 | 466283 | 5.98E-09 | 0.49 | G/C | 0.241(0.04) | *FZD9* |
| *Rikenellaceae_RC9_gut_group* | rs314862785 | 26 | 5116685 | 6.08E-09 | 0.486 | C/G | 0.251(0.042) | *FMOD* |
| *Rikenellaceae_RC9_gut_group* | rs313544031 | 11 | 7581181 | 8.00E-09 | 0.49 | A/T | 0.247(0.041) | *ITFG1* |
| *Rikenellaceae_RC9_gut_group* | rs314793299 | 20 | 2121848 | 9.39E-09 | 0.155 | T/A | -0.376(0.064) | *CHMP4B* |
| *Rikenellaceae_RC9_gut_group* | --- | 2 | 7206745 | 9.79E-09 | 0.257 | A/G | -0.247(0.042) | *ENSGALG00000006292* |
| *Rikenellaceae_RC9_gut_group* | --- | 7 | 29356633 | 1.32E-08 | 0.24 | C/T | -0.261(0.045) | *DPP10* |
| *Rikenellaceae_RC9_gut_group* | rs317785980 | 1 | 14118881 | 1.52E-08 | 0.126 | G/T | -0.379(0.065) | *PUS7* |
| *Rikenellaceae_RC9_gut_group* | rs317972245 | 28 | 4076789 | 2.26E-08 | 0.135 | G/A | -0.392(0.068) | *LSM4* |
| *Rikenellaceae_RC9_gut_group* | rs317171731 | 25 | 2748988 | 2.35E-08 | 0.158 | C/T | -0.356(0.062) | *MEF2D* |
| *Rikenellaceae_RC9_gut_group* | --- | 8 | 22478633 | 2.65E-08 | 0.174 | C/T | -0.355(0.062) | *TRABD2B* |
| *Rikenellaceae_RC9_gut_group* | rs314380854 | 3 | 18139944 | 3.86E-08 | 0.433 | G/C | 0.254(0.045) | *MIA3* |
| *Rikenellaceae_RC9_gut_group* | --- | 2 | 122537763 | 3.90E-08 | 0.158 | C/T | -0.34(0.06) | *RALYL* |
| *Rikenellaceae_RC9_gut_group* | rs10729601 | 1 | 179797396 | 4.26E-08 | 0.484 | A/G | 0.251(0.044) | *MICU2* |
| *Rikenellaceae_RC9_gut_group* | rs314565094 | 20 | 3583162 | 5.40E-08 | 0.335 | A/T | -0.237(0.042) | *MYBL2* |
| *Rikenellaceae_RC9_gut_group* | rs314542141 | 10 | 9024836 | 5.57E-08 | 0.144 | A/T | -0.37(0.066) | *ONECUT1* |
| *Rikenellaceae_RC9_gut_group* | rs317344448 | 2 | 33506624 | 5.97E-08 | 0.332 | A/T | -0.244(0.044) | *CREB5* |
| *Rikenellaceae_RC9_gut_group* | rs312590226 | 1 | 127658601 | 6.31E-08 | 0.214 | T/A | -0.262(0.047) | *STS* |
| *Rikenellaceae_RC9_gut_group* | --- | 11 | 12449213 | 6.52E-08 | 0.189 | C/T | -0.328(0.059) | *CDH11* |
| *Rikenellaceae_RC9_gut_group* | --- | 2 | 139554242 | 8.25E-08 | 0.408 | G/A | 0.26(0.047) | *MYC* |
| *Ruminococcaceae_UCG_014* | rs314860198 | 22 | 4186483 | 7.36E-08 | 0.388 | G/A | 0.485(0.088) | *TGFA* |
| *Sutterella* | rs315494328 | 1 | 12446509 | 4.90E-08 | 0.341 | C/A | 0.253(0.045) | *MAGI2* |
| *Sutterella* | rs313745263 | 1 | 180309157 | 1.21E-07 | 0.431 | G/C | -0.247(0.045) | *GJB6* |

aPosition were derived from remapping to Galgal6 by using LiftOver remapping tool.

bThe effect allele frequency calculated using the data from each breed.

cLinear regression coefficient beta and standard error (SE) of the minor allele.

dThe closet genes were derived from the Ensemble by using the new position from Galgal6.

Table 7 Genome-wide significant SNPs associated with the heritable caecal genera in Kadaknath.

| Trait | dbSNP | Chr | Positiona | *P*-value | EAFb | Minor/major allele | Effect size (SE)c | Closest genesd |
| --- | --- | --- | --- | --- | --- | --- | --- | --- |
| *Alistipes* | rs313222438 | 6 | 2917790 | 9.39E-08 | 0.118 | C/T | 0.617(0.112) | [*ENSGALG00000045754*](http://apr2022.archive.ensembl.org/Gallus_gallus/Gene/Summary?db=core;g=ENSGALG00000045754;r=6:2863968-2863970;t=ENSGALT00000084597) |
| *Bacteroides* | rs314430640 | 19 | 9541127 | 5.07E-26 | 0.12 | A/T | -1.994(0.169) | *MNT* |
| *Bacteroides* | --- | 8 | 26488717 | 1.15E-25 | 0.119 | A/G | -1.981(0.169) | *DAB1* |
| *Bacteroides* | --- | 2 | 1046953 | 6.56E-25 | 0.115 | T/G | -1.969(0.172) | [*ENSGALG00000051536*](http://apr2022.archive.ensembl.org/Gallus_gallus/Gene/Summary?db=core;g=ENSGALG00000051536;r=2:1046953-1046953;t=ENSGALT00000104014) |
| *Bacteroides* | rs317410227 | 21 | 1800743 | 8.35E-24 | 0.123 | T/A | -2.008(0.18) | *PRKCZ* |
| *Bacteroides* | rs312598647 | 1 | 23195221 | 5.94E-21 | 0.125 | A/T | -1.759(0.171) | *PTPRZ1* |
| *Bacteroides* | --- | 20 | 9699446 | 2.29E-17 | 0.104 | G/A | -1.69(0.185) | *STMN3* |
| *Bacteroides* | rs316393659 | 5 | 39775852 | 4.12E-16 | 0.124 | A/C | -1.375(0.158) | *NRXN3* |
| *Bacteroides* | --- | 18 | 7106780 | 2.44E-15 | 0.102 | C/A | -1.636(0.194) | [*ENSGALG00000026816*](http://apr2022.archive.ensembl.org/Gallus_gallus/Gene/Summary?db=core;g=ENSGALG00000026816;r=18:7091985-7091987;t=ENSGALT00000044283) |
| *Bacteroides* | rs313973602 | 8 | 22088100 | 3.51E-13 | 0.163 | A/T | -1.12(0.146) | *MKNK1* |
| *Bacteroides* | rs314859615 | 1 | 11665151 | 9.14E-13 | 0.184 | T/C | -0.878(0.117) | *GNAI1* |
| *Bacteroides* | --- | 11 | 12727635 | 5.49E-11 | 0.161 | G/A | -1.006(0.147) | *CDH8* |
| *Bacteroides* | rs80622196 | 14 | 8470968 | 1.23E-10 | 0.206 | T/A | -0.769(0.115) | *XYLT1* |
| *Bacteroides* | rs315548533 | 6 | 23701064 | 3.87E-10 | 0.191 | A/T | -0.88(0.135) | *POLL* |
| *Bacteroides* | --- | 17 | 6829375 | 9.39E-10 | 0.196 | A/G | -0.888(0.14) | *CFAP77* |
| *Bacteroides* | rs312810990 | 8 | 5830645 | 1.35E-09 | 0.151 | A/G | -1.04(0.165) | *NUF2* |
| *Bacteroides* | --- | 16 | 2331620 | 3.34E-09 | 0.217 | A/C | -0.808(0.132) | [*ENSGALG00000013101*](http://apr2022.archive.ensembl.org/Gallus_gallus/Gene/Summary?db=core;g=ENSGALG00000013101;r=16:2331620-2331620;t=ENSGALT00000093726) |
| *Bacteroides* | rs14083199 | 3 | 14491752 | 4.71E-09 | 0.407 | A/T | -0.614(0.101) | *PLCB1* |
| *Bacteroides* | rs312454781 | 23 | 4347551 | 5.09E-09 | 0.176 | C/A | -0.901(0.149) | *AGO1* |
| *Bacteroides* | rs14018411 | 11 | 1703664 | 2.04E-08 | 0.426 | C/T | -0.616(0.106) | *MTSS2* |
| *Bacteroides* | rs318169591 | 4 | 76113626 | 2.74E-08 | 0.233 | G/A | -0.688(0.12) | *LDB2* |
| *Bacteroides* | rs316807422 | 1 | 140697558 | 3.29E-08 | 0.067 | G/C | -1.274(0.224) | *ARHGEF7* |
| *Bacteroides* | rs13979608 | 1 | 176566425 | 3.41E-08 | 0.252 | C/T | -0.657(0.115) | *KATNAL1* |
| *Bacteroides* | rs14136995 | 2 | 9580663 | 5.82E-08 | 0.415 | A/T | 0.543(0.097) | *ESYT2* |
| *Bacteroides* | rs316826476 | 15 | 7951586 | 7.47E-08 | 0.496 | C/G | -0.6(0.108) | *TTC28* |
| *Bacteroides* | rs15115074 | 2 | 68840846 | 8.58E-08 | 0.174 | G/A | -0.919(0.167) | *CDH20* |
| *Blautia* | rs314763496 | 5 | 49829340 | 2.20E-08 | 0.087 | T/C | 0.687(0.119) | *TECPR2* |
| *Cloacibacillus* | rs316303702 | 1 | 38074354 | 5.12E-09 | 0.072 | T/C | -0.419(0.069) | *NAP1L1* |
| *Cloacibacillus* | --- | 2 | 46540733 | 8.81E-09 | 0.062 | A/C | -0.416(0.07) | *ELMO1* |
| *Cloacibacillus* | --- | 3 | 100539751 | 1.73E-08 | 0.059 | T/C | -0.481(0.083) | *RDH14* |
| *Cloacibacillus* | rs315806580 | 21 | 1977466 | 2.84E-08 | 0.089 | C/A | -0.363(0.063) | *NADK* |
| *Cloacibacillus* | rs316051823 | 1 | 88315998 | 3.28E-08 | 0.08 | A/C | -0.356(0.062) | *BBX* |
| *Cloacibacillus* | rs314049611 | 2 | 107012508 | 4.14E-08 | 0.146 | C/T | -0.269(0.048) | *ASXL* |
| *Cloacibacillus* | rs13847890 | 1 | 33218451 | 6.42E-08 | 0.057 | T/C | -0.43(0.077) | *PPM1H* |
| *Cloacibacillus* | --- | 3 | 26997654 | 6.86E-08 | 0.06 | A/G | -0.442(0.08) | *MCFD2* |
| *Cloacibacillus* | --- | 12 | 12540766 | 9.16E-08 | 0.095 | A/G | -0.323(0.059) | *FHIT* |
| *Cloacibacillus* | rs314002483 | 21 | 1977452 | 9.67E-08 | 0.097 | G/C | -0.326(0.059) | *NADK* |
| *Cloacibacillus* | --- | 4 | 32848036 | 9.83E-08 | 0.122 | G/A | -0.323(0.059) | *LRBA* |
| *Clostridiales.vadinBB60.group_X* | rs318008674 | 4 | 1249188 | 5.74E-10 | 0.101 | G/A | -1.105(0.172) | *RAB41* |
| *Clostridiales.vadinBB60.group_X* | rs315646827 | 28 | 4136821 | 2.13E-09 | 0.081 | G/T | -1.07(0.172) | *MAST3* |
| *Clostridiales.vadinBB60.group_X* | rs314316614 | 21 | 1262559 | 2.35E-09 | 0.125 | C/A | -0.944(0.152) | [*ENSGALG00000051432*](http://apr2022.archive.ensembl.org/Gallus_gallus/Gene/Summary?db=core;g=ENSGALG00000051432;r=21:1262559-1262559;t=ENSGALT00000093287) |
| *Clostridiales.vadinBB60.group_X* | rs315761738 | 6 | 6553287 | 2.41E-09 | 0.164 | C/T | -0.763(0.123) | *PCDH15* |
| *Clostridiales.vadinBB60.group_X* | --- | 5 | 564019 | 1.51E-08 | 0.131 | G/A | -0.964(0.165) | [*ENSGALG00000038143*](http://apr2022.archive.ensembl.org/Gallus_gallus/Gene/Summary?db=core;g=ENSGALG00000038143;r=5:564019-564019;t=ENSGALT00000086378) |
| *Clostridiales.vadinBB60.group_X* | --- | 8 | 26488717 | 1.96E-08 | 0.119 | A/G | 1.158(0.2) | *DAB1* |
| *Clostridiales.vadinBB60.group_X* | --- | 1 | 57238115 | 2.05E-08 | 0.141 | G/A | -0.851(0.147) | *TMEM178B* |
| *Clostridiales.vadinBB60.group_X* | --- | 10 | 17381992 | 2.12E-08 | 0.097 | G/T | -0.951(0.164) | *LRRC28* |
| *Clostridiales.vadinBB60.group_X* | --- | 12 | 2944162 | 5.54E-08 | 0.091 | G/T | -0.941(0.168) | *BSN* |
| *Clostridiales.vadinBB60.group_X* | rs317410227 | 21 | 1800743 | 8.15E-08 | 0.123 | T/A | 1.135(0.205) | *PRKCZ* |
| *Clostridiales.vadinBB60.group_X* | --- | 2 | 121456570 | 8.22E-08 | 0.125 | T/C | -0.884(0.16) | *SNX16* |
| *Clostridiales.vadinBB60.group_X* | rs314430640 | 19 | 9541127 | 9.26E-08 | 0.12 | A/T | 1.109(0.202) | *MNT* |
| *Desulfovibrionaceae_X* | --- | 2 | 99201730 | 9.37E-08 | 0.328 | T/C | 0.228(0.042) | *PTPRM* |
| *Eisenbergiella* | --- | 3 | 101961231 | 1.06E-07 | 0.133 | A/G | 0.551(0.101) | *LDAH* |
| *Erysipelatoclostridium* | --- | 10 | 16407079 | 3.12E-08 | 0.207 | G/A | 0.546(0.096) | *NR2F2* |
| *Erysipelotrichaceae_X* | --- | 2 | 110271573 | 4.72E-12 | 0.309 | A/G | 0.362(0.05) | *ATP6V1H* |
| *Erysipelotrichaceae_X* | rs314430640 | 19 | 9541127 | 7.94E-12 | 0.12 | A/T | 0.637(0.089) | *MNT* |
| *Erysipelotrichaceae_X* | --- | 18 | 7106780 | 1.12E-11 | 0.102 | C/A | 0.627(0.088) | [*ENSGALG00000026816*](http://apr2022.archive.ensembl.org/Gallus_gallus/Gene/Summary?db=core;g=ENSGALG00000026816;r=18:7091985-7091987;t=ENSGALT00000044283) |
| *Erysipelotrichaceae_X* | rs312598647 | 1 | 23195221 | 1.35E-10 | 0.125 | A/T | 0.563(0.084) | *PTPRZ1* |
| *Erysipelotrichaceae_X* | rs317410227 | 21 | 1800743 | 2.01E-10 | 0.123 | T/A | 0.597(0.09) | *PRKCZ* |
| *Erysipelotrichaceae_X* | --- | 8 | 26488717 | 2.17E-10 | 0.119 | A/G | 0.593(0.09) | *DAB1* |
| *Erysipelotrichaceae_X* | --- | 11 | 12727635 | 9.18E-09 | 0.161 | G/A | 0.4(0.067) | *CDH8* |
| *Erysipelotrichaceae_X* | --- | 17 | 6829375 | 9.64E-08 | 0.196 | A/G | 0.356(0.065) | *CFAP77* |
| *Helicobacter* | --- | 2 | 116059085 | 7.77E-10 | 0.164 | G/T | 0.509(0.08) | *C8orf34* |
| *Helicobacter* | --- | 1 | 145020382 | 9.59E-09 | 0.051 | A/G | 0.867(0.146) | *NALCN* |
| *Helicobacter* | --- | 15 | 11686172 | 1.41E-08 | 0.065 | C/T | 0.747(0.127) | *FBXW8* |
| *Helicobacter* | --- | 1 | 72755120 | 1.96E-08 | 0.128 | C/T | 0.568(0.098) | *PTHLH* |
| *Helicobacter* | --- | 2 | 122515965 | 2.57E-08 | 0.084 | T/C | 0.637(0.111) | *RALYL* |
| *Helicobacter* | --- | 2 | 122484172 | 4.16E-08 | 0.108 | T/G | 0.545(0.096) | *RALYL* |
| *Helicobacter* | --- | 2 | 122522174 | 4.37E-08 | 0.084 | T/C | 0.631(0.112) | *RALYL* |
| *Helicobacter* | --- | 2 | 122434328 | 4.48E-08 | 0.098 | C/T | 0.592(0.105) | *RALYL* |
| *Helicobacter* | --- | 2 | 122475120 | 4.48E-08 | 0.098 | G/A | 0.592(0.105) | *RALYL* |
| *Helicobacter* | --- | 1 | 72767514 | 7.24E-08 | 0.089 | C/A | 0.618(0.111) | *PTHLH* |
| *Helicobacter* | --- | 2 | 122453620 | 1.06E-07 | 0.097 | T/C | 0.59(0.108) | *RALYL* |
| *Muribaculaceae_X* | rs317151263 | 3 | 97200001 | 5.58E-08 | 0.148 | G/C | 0.238(0.042) | *ROCK2* |
| *Parasutterella* | --- | 9 | 13695119 | 4.59E-12 | 0.227 | C/T | 0.482(0.066) | [*ENSGALG00000052927*](http://apr2022.archive.ensembl.org/Gallus_gallus/Gene/Summary?db=core;g=ENSGALG00000052927;r=9:13695119-13695119;t=ENSGALT00000107554) |
| *Parasutterella* | rs13608200 | 9 | 13624556 | 1.18E-08 | 0.349 | G/C | 0.388(0.066) | *FGF12* |
| *Parasutterella* | --- | 9 | 13698113 | 3.42E-08 | 0.274 | A/G | 0.406(0.071) | [*ENSGALG00000052927*](http://apr2022.archive.ensembl.org/Gallus_gallus/Gene/Summary?db=core;g=ENSGALG00000052927;r=9:13688962-13688964;t=ENSGALT00000107554) |
| *Parasutterella* | --- | 9 | 13498932 | 5.19E-08 | 0.238 | T/C | 0.416(0.074) | *FGF12* |
| *Parasutterella* | rs317887276 | 3 | 15450507 | 9.02E-08 | 0.11 | G/A | 0.588(0.107) | *FAM161A* |
| *Rikenella* | --- | 1 | 147234079 | 1.93E-08 | 0.358 | C/T | -0.247(0.043) | *UGGT2* |
| *Rikenellaceae_X* | --- | 1 | 140264365 | 3.65E-10 | 0.305 | T/C | -0.287(0.044) | *COL4A2* |
| *Rikenellaceae_X* | --- | 1 | 140262007 | 4.00E-09 | 0.291 | T/C | -0.276(0.045) | *COL4A2* |
| *Rikenellaceae_X* | --- | 1 | 140307848 | 1.12E-08 | 0.37 | T/C | -0.267(0.045) | *COL4A2* |
| *Rikenellaceae_X* | --- | 1 | 140257153 | 1.55E-08 | 0.297 | G/A | -0.263(0.045) | *COL4A2* |
| *Rikenellaceae_X* | --- | 1 | 140299128 | 3.41E-08 | 0.313 | T/C | -0.257(0.045) | *COL4A2* |
| *Rikenellaceae_X* | --- | 1 | 140347914 | 4.09E-08 | 0.324 | G/A | -0.258(0.046) | *COL4A2* |
| *Rikenellaceae_X* | --- | 1 | 140345020 | 4.23E-08 | 0.315 | T/G | -0.254(0.045) | *COL4A2* |
| *Rikenellaceae_X* | --- | 1 | 140342437 | 6.53E-08 | 0.315 | C/T | -0.251(0.045) | *COL4A2* |
| *Ruminiclostridium* | --- | 28 | 1101128 | 9.94E-08 | 0.127 | C/A | -0.818(0.149) | *PIP5K1C* |
| *Ruminococcaceae.UCG.009* | rs315646827 | 28 | 4136821 | 6.31E-09 | 0.081 | G/T | -0.47(0.078) | *MAST3* |
| *Ruminococcaceae.UCG.009* | --- | 7 | 26314800 | 2.06E-08 | 0.492 | A/G | -0.219(0.038) | *IQCB1* |
| *Ruminococcaceae.UCG.009* | --- | 3 | 46086416 | 2.80E-08 | 0.121 | G/A | -0.373(0.065) | *UTRN* |
| *Ruminococcus.1* | rs315646827 | 28 | 4136821 | 3.44E-08 | 0.081 | G/T | -0.46(0.081) | *MAST3* |
| *Ruminococcus.1* | rs312454781 | 23 | 4347551 | 6.48E-08 | 0.176 | C/A | 0.371(0.067) | *AGO1* |

aPosition were derived from remapping to Galgal6 by using LiftOver remapping tool.

bThe effect allele frequency calculated using the data from each breed.

cLinear regression coefficient beta and standard error (SE) of the minor allele.

dThe closet genes were derived from the Ensemble by using the new position from Galgal6.

Table 9: Significant associations from the fine-mapping of variants from WGS data in Cobb400.

| Trait | Chr | Positiona | Alleles | Adjusted R-squaredb | BH-corrected P-valuesc | Gened | dbSNP |
| --- | --- | --- | --- | --- | --- | --- | --- |
| *Campylobacter* | 4 | 1599253 | A/G | 0.814 | 0.0484 | *BCORL1* | rs318035003 |
| *Campylobacter* | 4 | 1599708 | A/G | 0.814 | 0.0484 | *BCORL1* | rs313016729 |
| *Campylobacter* | 4 | 1601907 | C/T | 0.814 | 0.0484 | *BCORL1* | rs732518573 |
| *Campylobacter* | 4 | 1617251 | C/T | 0.814 | 0.0484 | *ENSGALG00000024039* | rs317418962 |
| *Campylobacter* | 4 | 1618546 | G/A | 0.814 | 0.0484 | *ENSGALG00000024039* | rs736739889 |
| *Campylobacter* | 4 | 1632021 | G/A | 0.814 | 0.0484 | *ZDHHC9* | rs16348284 |
| *Campylobacter* | 4 | 1632048 | C/A | 0.814 | 0.0484 | *ZDHHC9* | rs316138545 |
| *Campylobacter* | 4 | 1636277 | C/T | 0.995 | 5.50E-07 | *SASH3* |  |
| *Campylobacter* | 4 | 1636306 | G/A | 0.814 | 0.0484 | *SASH3* | rs741001285 |
| *Campylobacter* | 4 | 1651602 | C/T | 0.843 | 0.0378 | *ENSGALG00000003920* | rs735785086 |
| *Campylobacter* | 4 | 1668702 | C/T | 1 | 3.10E-62 | *ENSGALG00000003920* | rs1057870092 |
| *Campylobacter* | 4 | 1671605 | A/T | 1 | 4.01E-16 | *ERCC6L* | rs15471122 |
| *Campylobacter* | 4 | 1671724 | A/G | 1 | 4.01E-16 | *ERCC6L* | rs735096987 |
| *Campylobacter* | 4 | 1671776 | T/C | 0.843 | 0.0378 | *ERCC6L* | rs732477567 |
| *Campylobacter* | 4 | 1671871 | A/G | 0.843 | 0.0378 | *ERCC6L* | rs16348244 |
| *Campylobacter* | 4 | 1671880 | A/G | 0.843 | 0.0378 | *ERCC6L* | rs16348242 |
| *Campylobacter* | 4 | 1671907 | T/C | 1 | 4.01E-16 | *ERCC6L* | rs314795325 |
| *Campylobacter* | 4 | 1672034 | T/C | 0.843 | 0.0378 | *ERCC6L* | rs16348240 |
| *Campylobacter* | 4 | 1672120 | G/C | 1 | 4.01E-16 | *ERCC6L* | rs313889702 |
| *Campylobacter* | 4 | 1672291 | G/A | 0.843 | 0.0378 | *ERCC6L* | rs16348239 |
| *Campylobacter* | 4 | 1672358 | C/T | 0.843 | 0.0378 | *ERCC6L* | rs318055549 |
| *Campylobacter* | 4 | 1672807 | A/T | 0.843 | 0.0378 | *ERCC6L* | rs734279028 |
| *Campylobacter* | 4 | 1672936 | G/A | 0.995 | 5.50E-07 | *ERCC6L* | rs315346659 |
| *Campylobacter* | 4 | 1679166 | G/C | 0.995 | 5.50E-07 | *NHSL2* |  |
| *Campylobacter* | 4 | 1681131 | C/T | 0.843 | 0.0378 | *NHSL2* | rs737335281 |
| *Campylobacter* | 4 | 1684226 | C/T | 0.843 | 0.0378 | *NHSL2* | rs1058199410 |
| *Campylobacter* | 27 | 6818579 | A/G | 1 | 1.96E-07 | *PCGF2* |  |
| *Campylobacter* | 27 | 6818586 | T/C | 1 | 1.96E-07 | *PCGF2* |  |
| *Fournierella* | 17 | 6789830 | G/A | 1 | 3.54E-88 | *SETX* | rs1058469165 |
| *Fournierella* | 17 | 6805458 | C/T | 1 | 9.45E-88 | *SETX* | rs1059946721 |
| *Fournierella* | 17 | 6825373 | G/A | 1 | 3.54E-88 | *TTF1* | rs1059022188 |
| PCoA2 | Z | 47469359 | A/T | 0.948 | 0.0065 | *ENSGALG00000000264* | rs317417966 |
| *Rikenellaceae_RC9_gut_group* | 3 | 104752455 | C/T | 1 | 1.48E-88 | *ASXL2* | rs318156060 |
| *Rikenellaceae_RC9_gut_group* | 19 | 5885668 | G/T | 0.833 | 0.0434 | *ALDOC* |  |
| *Rikenellaceae_RC9_gut_group* | 28 | 4041754 | A/T | 0.998 | 4.46E-07 | *SSBP4* |  |
| *Sutterella* | 1 | 180296314 | C/T | 0.839 | 0.0395 | *ENSGALG00000048789* | rs13557110 |

aPosition were derived from remapping to Galgal6 by using LiftOver remapping tool.

bThe coefficient of determination that has been adjusted for the number of predictors in the model.

cBenjamini-Hochberg corrected p-values.

dThe genes were derived from the Ensemble by using the new position from Galgal6.

Table 10: Significant associations from the fine-mapping of variants from WGS data in Kadaknath.

| Trait | Chr | Positiona | Alleles | Adjusted R-squaredb | BH-corrected P-valuesc | Gened | dbSNP |
| --- | --- | --- | --- | --- | --- | --- | --- |
| *Alistipes* | 6 | 2888427 | G/A | 0.674 | 0.0489 | ENSGALG00000045754 | rs1058829383 |
| *Cloacibacillus* | 1 | 33225633 | T/A | 0.725 | 0.0261 | ENSGALG00000051395 | rs313087896 |
| *Cloacibacillus* | 2 | 107005639 | A/C | 0.688 | 0.0489 | ASXL3 | rs431882435 |
| *Helicobacter* | 15 | 11717200 | C/T | 0.73 | 0.0115 | RNFT2 | rs736825520 |
| *Parasutterella* | 3 | 15445859 | C/G | 0.69 | 0.0239 | FAM161A | rs731510358 |
| *Parasutterella* | 3 | 15446494 | T/C | 0.736 | 0.0224 | FAM161A | rs315146219 |
| *Parasutterella* | 3 | 15480423 | G/T | 0.69 | 0.0239 | SEC23B | rs313266496 |
| PCoA4 | 2 | 8747688 | G/A | 0.841 | 0.0021 | DNAJB6 | rs318015763 |
| PCoA4 | 2 | 8760491 | G/A | 0.856 | 0.0009 | DNAJB6 | rs29008277 |
| PCoA4 | 13 | 7444249 | T/C | 0.844 | 0.0021 | HMMR | rs732400520 |
| PCoA4 | 13 | 7444981 | G/A | 0.849 | 0.0009 | HMMR | rs312408655 |
| PCoA4 | 13 | 7445123 | T/C | 0.833 | 0.0024 | HMMR | rs314384075 |
| PCoA4 | 13 | 7445461 | C/G | 0.864 | 0.0014 | HMMR | rs317439108 |
| PCoA4 | 13 | 7446253 | G/C | 0.835 | 0.0023 | HMMR | rs312962381 |
| PCoA4 | 13 | 7446309 | T/C | 0.825 | 0.0060 | HMMR | rs312618216 |
| PCoA4 | 13 | 7454025 | G/A | 0.846 | 0.0010 | NUDCD2 | rs316079863 |
| PCoA4 | 13 | 7479450 | A/C | 0.871 | 0.0011 | ENSGALG00000050328 | rs316859576 |
| PCoA4 | 17 | 6781736 | G/A | 0.852 | 0.0009 | NTNG2 |  |
| PCoA4 | 17 | 6789830 | G/A | 0.928 | 6.55E-05 | SETX | rs1058469165 |
| PCoA4 | 17 | 6789881 | T/C | 0.852 | 0.0009 | SETX | rs314057971 |
| PCoA4 | 17 | 6789965 | C/T | 0.833 | 0.0024 | SETX | rs1060476827 |
| PCoA4 | 17 | 6789978 | T/C | 0.856 | 0.0018 | SETX | rs10721871 |
| PCoA4 | 17 | 6790010 | C/T | 0.852 | 0.0009 | SETX | rs738244051 |
| PCoA4 | 17 | 6790013 | T/C | 0.877 | 0.0009 | SETX | rs740430334 |
| PCoA4 | 17 | 6790019 | G/A | 0.877 | 0.0009 | SETX | rs1058375126 |
| PCoA4 | 17 | 6790225 | T/A | 0.887 | 0.0009 | SETX | rs732554714 |
| PCoA4 | 17 | 6790305 | C/A | 0.928 | 6.55E-05 | SETX | rs739932192 |
| PCoA4 | 17 | 6796535 | T/C | 0.814 | 0.0078 | SETX | rs314235243 |
| PCoA4 | 17 | 6804566 | C/G | 0.852 | 0.0009 | SETX | rs15795715 |
| PCoA4 | 17 | 6804861 | G/C | 0.832 | 0.0024 | SETX | rs317847919 |
| PCoA4 | 17 | 6805011 | T/C | 0.836 | 0.0023 | SETX | rs739269923 |
| PCoA4 | 17 | 6805038 | C/G | 0.871 | 0.0009 | SETX | rs734130519 |
| PCoA4 | 17 | 6805061 | G/A | 0.849 | 0.0009 | SETX | rs731874490 |
| PCoA4 | 17 | 6805104 | A/T | 0.865 | 0.0009 | SETX |  |
| PCoA4 | 17 | 6805107 | T/C | 0.842 | 0.0021 | SETX | rs317326501 |
| PCoA4 | 17 | 6805458 | C/T | 0.928 | 6.55E-05 | SETX | rs1059946721 |
| PCoA4 | 17 | 6805604 | G/A | 0.842 | 0.0021 | SETX | rs15795712 |
| PCoA4 | 17 | 6805743 | T/C | 0.849 | 0.0009 | SETX | rs739203699 |
| PCoA4 | 17 | 6805787 | A/G | 0.852 | 0.0009 | SETX | rs735760035 |
| PCoA4 | 17 | 6805932 | A/G | 0.852 | 0.0009 | SETX | rs14099744 |
| PCoA4 | 17 | 6805958 | G/A | 0.851 | 0.0009 | SETX | rs734969725 |
| PCoA4 | 17 | 6807075 | C/T | 0.832 | 0.0024 | SETX | rs731914795 |
| PCoA4 | 17 | 6807212 | G/A | 0.864 | 0.0009 | SETX | rs315463693 |
| PCoA4 | 17 | 6807473 | T/C | 0.849 | 0.0009 | SETX | rs736436238 |
| PCoA4 | 17 | 6807488 | T/A | 0.84 | 0.0021 | SETX | rs14099743 |
| PCoA4 | 17 | 6807491 | T/A | 0.84 | 0.0021 | SETX | rs14099742 |
| PCoA4 | 17 | 6807527 | G/A | 0.89 | 0.0009 | SETX | rs738776151 |
| PCoA4 | 17 | 6808335 | T/C | 0.847 | 0.0021 | SETX | rs316220761 |
| PCoA4 | 17 | 6808374 | T/C | 0.834 | 0.0048 | SETX | rs14099741 |
| PCoA4 | 17 | 6810251 | T/C | 0.851 | 0.0020 | SETX | rs315051620 |
| PCoA4 | 17 | 6820327 | C/T | 0.843 | 0.0021 | TTF1 | rs314157839 |
| PCoA4 | 17 | 6820399 | G/C | 0.843 | 0.0021 | TTF1 | rs313187579 |
| PCoA4 | 17 | 6825316 | T/C | 0.849 | 0.0020 | TTF1 | rs317309447 |
| PCoA4 | 17 | 6825330 | G/A | 0.884 | 0.0009 | TTF1 | rs741073865 |
| PCoA4 | 17 | 6825344 | C/A | 0.849 | 0.0020 | TTF1 | rs313530217 |
| PCoA4 | 17 | 6825373 | G/A | 0.928 | 6.55E-05 | TTF1 | rs1059022188 |
| PCoA4 | 17 | 6826181 | G/A | 0.849 | 0.0020 | TTF1 | rs312905642 |
| PCoA4 | 17 | 6826274 | A/G | 0.849 | 0.0020 | TTF1 | rs733598522 |
| PCoA4 | 17 | 6826526 | G/A | 0.836 | 0.0023 | TTF1 | rs316976751 |
| PCoA6 | 20 | 5975310 | C/T | 0.763 | 0.0057 | SULF2 |  |

aPosition were derived from remapping to Galgal6 by using LiftOver remapping tool.

bThe coefficient of determination that has been adjusted for the number of predictors in the model.

cBenjamini-Hochberg corrected p-values.

dThe genes were derived from the Ensemble by using the new position from Galgal6.
